# Supplementary material for: Expression Quantitative Trait Locus Mapping in Pulmonary Arterial Hypertension
Source: PubMed Central journal article supplement (PMC7690609; doi:10.3390/genes11111247), 2020-10-22
Supplement: genes-11-01247-s001.pdf [file genes-11-01247-s001.pdf]

# Supplementary Appendix

for

Expression quantitative trait locus mapping in pulmonary arterial  
hypertension

Anna Ulrich *et al.*

|                                                          |   |
|----------------------------------------------------------|---|
| RNA sequencing and transcript abundance estimation ..... | 2 |
| eQTL validation procedure.....                           | 2 |
| eQTL studies used for validation.....                    | 3 |
| Supplementary Tables .....                               | 4 |

## RNA sequencing and transcript abundance estimation

Whole blood (3ml) was collected in Tempus™ Blood RNA Tubes, which were stored at -80 °C until required. RNA was extracted using a Maxwell robotic system (Promega). Samples with a 260/230 ratio >1.5 and a 260/280 ratio in the range 1.9-2.1 were further quality checked by Bioanalyser and those achieving a minimum RNA Integrity Number (RIN) of 7 were submitted for sequencing. Globin-Zero Gold rRNA Removal Kits (Illumina Inc, San Diego, CA) were used to remove ribosomal RNA contamination from whole blood RNA samples. 75bp paired-end sequencing on a Hiseq4000 was performed on pooled libraries of ~80 samples.

Fastq files (raw reads from RNAseq) were analysed using Salmon v0.9.1 (Patro et al., 2017) and GENCODE release 28 to produce transcript abundance estimates which were converted to gene expression data using tximport in R (Soneson et al., 2015). Salmon, the first transcriptome-wide quantifier to correct for fragment GC-content bias was used, which substantially improves the accuracy of abundance estimates and the sensitivity of subsequent differential expression analysis (Patro et al., 2017).

## eQTL validation procedure

To assess the extent to which expression quantitative trait locus (eQTL) - transcript pairs in PAH overlap with previously reported eQTL-transcript pairs described in healthy populations, we calculated the validation rate of our findings in the two largest published eQTL studies to date and the Genotype-Tissue Expression (GTEx) Project (Westra et al., 2013, Joehanes et al., 2017, Aguet et al., 2019). Validation rate was defined as the number of significant eQTL-transcript pairs in this study confirmed by the published study divided by the total number of significant eQTL-transcript pairs that were tested by the published study and multiplied by one hundred.

We extracted all eQTL with effects below the study specific significance threshold from the published studies` results for all significant transcripts in this study. Ensembl identifiers were used for the transcripts and genomic coordinates (chromosome and base pair position) on the Genome Reference Consortium Human Build 37 for eQTL when matching my eQTL-transcript pairs to those published by the external studies.

An eQTL-transcript pair was considered confirmed if the lead variant was in linkage disequilibrium ( $r^2 \geq 40\%$ ) with the lead eQTL of the same transcript in the published study. For this purpose, a list of correlated variants was obtained from the European population of the 1000 Genomes Project (Durbin et al., 2010) - using the R package 'proxysnps' - for each lead eQTL reported by the studies used for validation. Each eQTL-transcript pair that reached the study-specific significance threshold in at least one of the studies was considered confirmed.

Since the complete list of variants or transcripts that passed study-specific quality control is not usually made available by published studies, we had to make assumptions when determining the total number of my significant eQTL-transcript pairs tested in the external studies. This did not apply to GTEx results where all tested eQTL-transcript pairs could be retrieved.

All transcripts present on the expression array used in the other two studies were assumed to have been tested. Annotation files were downloaded from the manufacturer`s website for the complete list of transcripts present on the expression arrays. Additionally, all eQTL in this study were assumed

to have been available for analysis in the studies used for validation which used genotyping array data imputed to high-density reference panels. We restricted our analyses to common variants with a minimum minor allele frequency of 5% which is at least as high as those of the published eQTL studies used for validation.

#### eQTL studies used for validation

We selected two of the largest published eQTL studies and the GTEx Project to compare our results to. Westra et al. (Westra et al., 2013) meta-analysed eQTL effects from seven studies totaling 5,311 individuals to identify cis-acting effects genome-wide as well as trans-acting effects of 4,542 variants implicated in diseases and traits from the GWAS Catalog (Buniello et al., 2019) at the time of their study. The other eQTL study used for validation was published by Joehanes et al. (Joehanes et al., 2017) who conducted the largest to-date single cohort transcriptome-wide analysis testing both cis- and trans-acting elements genome-wide in the whole blood samples of 5,257 individuals from the Framingham Heart Study. The GTEx Project aims to create a database of genotype and gene expression correlations in multiple human tissues of consenting donors to aid the scientific community in understanding inherited disease susceptibility. The GTEx website provides a browser (<https://gtexportal.org/home/testyourown>) for retrieving results for any given variant and transcript pair based on Ensembl identifiers in the tissue of interest.

The current release (V8) of the GTEx Project has 838 post-mortem donor samples with genetic data of which 670 contributed to the eQTL mapping in whole blood (GTExPortal, Aguet et al., 2019). Only tissue samples that passed histological examination were accepted for the project, however tissue exclusions were not made based on cause of death. Demographics and cause of death statistics can be found on the GTEx Portal (<https://gtexportal.org/>).

Westra et al. meta-analysed seven studies that measured gene expression in peripheral blood on one of Illumina's whole-genome Expression BeadChips (HT12v3, HT12v4 or H8v2 arrays). Since most of the cohorts used the HT12v3 array, the analyses were restricted to transcripts present on this array (Westra et al., 2013). Joehanes et al. used the Affymetrix Human Exon ST 1.0 array for the whole cohort (Joehanes et al., 2017). The complete list of transcripts was obtained from the manifest files, namely HumanHt-12\_V3\_0\_R3\_11283641\_A.bgx for Illumina and HuEx-1\_0-st-v2.na33.1.hg19.probeset.csv for Affymetrix, available on the manufacturers' websites.

The genotype data from Westra et al. and Joehanes et al. were imputed to the largest haplotype reference panels available at the time of conducting their analyses. Westra et al. mapped cis-eQTL differently from our and the other two studies' approach, using a 250 kilobases (kb) maximum distance from the probe midpoint to demarcate cis effects, while eQTLs with a distance greater than 5 Mb were defined as trans-eQTLs. The validation rate of our trans eQTL was not assessed using Westra's trans eQTL results as they have only tested a small set of selected variants. Also, cis-eQTL in this study were restricted to the ones not farther than 250 kb from the transcript's TSS when validating cis-eQTL with Westra's results.

## Supplementary Tables

|                                                                                                                                                           |    |
|-----------------------------------------------------------------------------------------------------------------------------------------------------------|----|
| Supplementary Table 1 Patient characteristics and white blood cell fractions in the PAH Cohort study.....                                                 | 5  |
| Supplementary Table 2 Lead variants for novel eQTL in the PAH Cohort ordered by variance explained in gene expression.....                                | 6  |
| Supplementary Table 3 Phenotypes from the NHGRI-EBI GWAS Catalog of published genome-wide association studies reported for novel and confirmed eQTL. .... | 21 |
| Supplementary Table 4 Significant KEGG pathways from the enrichment analysis of genes with novel eQTL in the PAH Cohort. ....                             | 27 |

| <b>Characteristic</b>                      | <b>Males</b>  | <b>Females</b> |
|--------------------------------------------|---------------|----------------|
| <b>N (%)</b>                               | 82 (30)       | 194 (70)       |
| <b>Age at diagnosis, yr</b>                | 45.6 (24.5)   | 47.7 (22.1)    |
| <b>Age at sampling, yr</b>                 | 54.4 (22.8)   | 52.9 (21.8)    |
| <b>B cells</b>                             | 0.028 (0.014) | 0.028 (0.016)  |
| <b>Alternatively activated macrophages</b> | 0.022 (0.008) | 0.020 (0.011)  |
| <b>Neutrophils</b>                         | 0.265 (0.098) | 0.285 (0.100)  |
| <b>Natural killer cells</b>                | 0.020 (0.017) | 0.020 (0.020)  |
| <b>CD8+ T cells</b>                        | 0.050 (0.057) | 0.050 (0.038)  |
| <b>Regulatory CD4+ T cells</b>             | 0.150 (0.128) | 0.160 (0.128)  |
| <b>Other uncharacterized cells</b>         | 0.397 (0.117) | 0.392 (0.141)  |

*Supplementary Table 1 Patient characteristics and white blood cell fractions in the PAH Cohort study.* Age and white blood cell fractions are presented as median (interquartile range).

**Supplementary Table 2 Lead variants for novel eQTL in the PAH Cohort ordered by variance explained in gene expression.**

Column names: eQTL rs ID = dbSNP (150) variant identifier; eQTL chr:pos = chromosome and genomic position (Ensembl GRCh37 coordinates); ref = reference allele in the human genome reference GRCh37; alt = alternative allele in the human genome reference GRCh37; Ensembl gene ID = Ensembl stable gene identifiers; variant type = dbSNP version 150 variant annotation; R<sup>2</sup> = percent (%) variance explained in gene expression by the genetic variant; Gene type: PC = protein coding, TC = transcribed, PPG = processed pseudogene, unPPG = unprocessed pseudogene, lncRNA = long non-coding RNA, TR V gene = T-cell receptor variable gene, IG V gene = immunoglobulin variable gene, snRNA = small nuclear RNA, snoRNA = small nucleolar RNA, miRNA = micro RNA.

| eQTL rs ID  | eQTL chr:pos | ref | alt | Gene symbol          | Ensembl gene ID | cis/trans | eQTL P-value           | R <sup>2</sup> | Gene type |
|-------------|--------------|-----|-----|----------------------|-----------------|-----------|------------------------|----------------|-----------|
| rs2295768   | 6:2954602    | C   | T   | <i>HTATSFP2</i>      | ENSG00000271361 | cis       | 7.1x10 <sup>-83</sup>  | 57.4           | PPG       |
| rs2240101   | 15:31115709  | G   | C   | <i>RP5.1086D14.5</i> | ENSG00000259845 | cis       | 4.5x10 <sup>-79</sup>  | 56.2           | unPPG     |
| rs2302559   | 7:105903904  | T   | C   | <i>NAMPTL</i>        | ENSG00000229644 | trans     | 6.35x10 <sup>-78</sup> | 55.9           | PPG       |
| rs745666    | 17:72744798  | G   | C   | <i>RP11.452I5.2</i>  | ENSG00000266036 | cis       | 1.9x10 <sup>-70</sup>  | 53.3           | PC        |
| rs7635      | 11:721570    | C   | T   | <i>RPLP2</i>         | ENSG00000177600 | cis       | 2.05x10 <sup>-70</sup> | 53.3           | lncRNA    |
| rs471521    | 12:10115647  | A   | T   | <i>CLEC12B</i>       | ENSG00000256660 | cis       | 1.94x10 <sup>-68</sup> | 52.5           | PC        |
| rs67933574  | 12:11226237  | A   | G   | <i>TAS2R43</i>       | ENSG00000255374 | cis       | 8.58x10 <sup>-65</sup> | 51.1           | PC        |
| rs11079015  | 17:39975164  | C   | T   | <i>NT5C3B</i>        | ENSG00000141698 | cis       | 2.28x10 <sup>-64</sup> | 51             | PC        |
| rs2280370   | 16:89627460  | T   | G   | <i>RPL13P12</i>      | ENSG00000215030 | trans     | 1.72x10 <sup>-62</sup> | 50.2           | TCunPPG   |
| rs9892882   | 17:18501596  | A   | G   | <i>USP32P1</i>       | ENSG00000188933 | trans     | 2.03x10 <sup>-62</sup> | 50.2           | PPG       |
| rs9892882   | 17:18501596  | A   | G   | <i>CCDC144A</i>      | ENSG00000170160 | trans     | 3.71x10 <sup>-62</sup> | 50.1           | PC        |
| rs72785089  | 16:70005967  | A   | G   | <i>CLEC18A</i>       | ENSG00000157322 | cis       | 1.14x10 <sup>-61</sup> | 49.9           | PC        |
| rs10947675  | 6:37479972   | G   | A   | <i>RP1.153P14.8</i>  | ENSG00000204110 | cis       | 4.66x10 <sup>-60</sup> | 49.2           | lncRNA    |
| rs1455979   | 21:44524006  | G   | A   | <i>U2AF1</i>         | ENSG00000160201 | cis       | 2.5x10 <sup>-59</sup>  | 48.9           | PC        |
| rs12975591  | 19:10627814  | A   | G   | <i>CTC.539A10.4</i>  | ENSG00000267100 | cis       | 1.6x10 <sup>-58</sup>  | 48.5           | lncRNA    |
| rs10790962  | 11:128385169 | G   | A   | <i>Sep-03</i>        | ENSG00000100167 | trans     | 4.37x10 <sup>-57</sup> | 47.9           | PC        |
| rs12225372  | 11:74604594  | A   | G   | <i>XRR1</i>          | ENSG00000166435 | cis       | 4.79x10 <sup>-56</sup> | 47.4           | PC        |
| rs2732603   | 17:44367288  | G   | C   | <i>RP11.197O15.1</i> | ENSG00000214401 | cis       | 5.07x10 <sup>-55</sup> | 46.9           | lncRNA    |
| rs79240608  | 1:149585945  | T   | C   | <i>NBPF26</i>        | ENSG00000273136 | trans     | 6.4x10 <sup>-55</sup>  | 46.9           | PC        |
| rs2336136   | 14:74030518  | T   | A   | <i>ACOT1</i>         | ENSG00000184227 | cis       | 1.12x10 <sup>-54</sup> | 46.8           | PC        |
| rs2286466   | 16:2014283   | A   | G   | <i>RPS2P5</i>        | ENSG00000240342 | trans     | 4.46x10 <sup>-54</sup> | 46.5           | PPG       |
| rs2656417   | 17:18475630  | T   | C   | <i>USP32P2</i>       | ENSG00000233327 | cis       | 7.58x10 <sup>-54</sup> | 46.4           | TCunPPG   |
| rs55969088  | 18:9024224   | G   | T   | <i>NDUFV2P1</i>      | ENSG00000267809 | trans     | 7.55x10 <sup>-54</sup> | 46.4           | PPG       |
| rs9264607   | 6:31237605   | G   | A   | <i>HLA.L</i>         | ENSG00000243753 | trans     | 2.13x10 <sup>-53</sup> | 46.2           | TCunPPG   |
| rs61744075  | 8:23288346   | C   | A   | <i>NKX3.1</i>        | ENSG00000167034 | cis       | 1.92x10 <sup>-52</sup> | 45.7           | PC        |
| rs17847967  | 12:8082367   | T   | C   | <i>SLC2A14</i>       | ENSG00000173262 | cis       | 2.4x10 <sup>-52</sup>  | 45.6           | PC        |
| rs11677238  | 2:114424974  | T   | G   | <i>AC002055.4</i>    | ENSG00000184319 | trans     | 4.55x10 <sup>-52</sup> | 45.5           | TCunPPG   |
| rs73287153  | 7:12139272   | A   | G   | <i>VWDE</i>          | ENSG00000146530 | cis       | 7.37x10 <sup>-52</sup> | 45.4           | PC        |
| rs216257    | 6:24934664   | A   | T   | <i>LSAMP</i>         | ENSG00000185565 | trans     | 1x10 <sup>-50</sup>    | 44.8           | PC        |
| rs10489762  | 1:183570545  | G   | T   | <i>CTD.2058B24.2</i> | ENSG00000259048 | trans     | 1.84x10 <sup>-50</sup> | 44.7           | lncRNA    |
| rs2732603   | 17:44367288  | G   | C   | <i>RP11.583F2.1</i>  | ENSG00000264057 | trans     | 2.02x10 <sup>-50</sup> | 44.7           | TCunPPG   |
| rs111839387 | 7:65285169   | C   | T   | <i>PSPH</i>          | ENSG00000146733 | trans     | 5.95x10 <sup>-50</sup> | 44.4           | PC        |
| rs12447763  | 16:23753594  | G   | T   | <i>RP11.151E14.1</i> | ENSG00000261035 | trans     | 8.42x10 <sup>-50</sup> | 44.4           | lncRNA    |
| rs9934565   | 16:87764267  | A   | T   | <i>RP11.278A23.2</i> | ENSG00000260671 | cis       | 1.73x10 <sup>-49</sup> | 44.2           | lncRNA    |
| rs2732617   | 17:44363632  | A   | C   | <i>RP11.359G22.2</i> | ENSG00000230400 | trans     | 4.78x10 <sup>-49</sup> | 44             | lncRNA    |

| eQTL rs ID  | eQTL chr:pos | ref | alt | Gene symbol          | Ensembl gene ID | cis/trans | eQTL P-value | R <sup>2</sup> | Gene type  |
|-------------|--------------|-----|-----|----------------------|-----------------|-----------|--------------|----------------|------------|
| rs9273495   | 6:32628273   | G   | A   | <i>HLA.DQB2</i>      | ENSG00000232629 | cis       | 1.07x10-48   | 43.8           | PC         |
| rs4976210   | 5:70307464   | T   | C   | <i>SERF1A</i>        | ENSG00000172058 | cis       | 1.65x10-48   | 43.7           | PC         |
| rs2732603   | 17:44367288  | G   | C   | <i>DND1P1</i>        | ENSG00000264070 | cis       | 2.68x10-48   | 43.6           | PPG        |
| rs145140188 | 11:77627431  | G   | C   | <i>INTS4P1</i>       | ENSG00000164669 | trans     | 4.36x10-48   | 43.5           | TCunPPG    |
| rs2294641   | 1:11721854   | C   | T   | <i>FBXO44</i>        | ENSG00000132879 | cis       | 1.12x10-46   | 42.7           | PC         |
| rs111164082 | 17:44047037  | T   | A   | <i>RP11.798G7.3</i>  | ENSG00000214425 | cis       | 1.8x10-46    | 42.6           | TCunPPG    |
| rs6085421   | 20:61422259  | T   | A   | <i>RP11.199O14.1</i> | ENSG00000229876 | cis       | 2.95x10-46   | 42.5           | lncRNA     |
| rs471521    | 12:10115647  | A   | T   | <i>AC091814.2</i>    | ENSG00000225231 | cis       | 8.12x10-46   | 42.2           | lncRNA     |
| rs10409076  | 19:45057224  | G   | T   | <i>CEACAM22P</i>     | ENSG00000230666 | cis       | 1.68x10-45   | 42.1           | TCunPPG    |
| rs12912107  | 15:48520590  | G   | A   | <i>C10orf111</i>     | ENSG00000176236 | trans     | 2.46x10-45   | 42             | PC         |
| rs150996856 | 7:76596954   | G   | A   | <i>CCDC146</i>       | ENSG00000135205 | cis       | 2.44x10-45   | 42             | lncRNA     |
| rs2272550   | 14:22591988  | C   | A   | <i>TRAV26.1</i>      | ENSG00000211807 | cis       | 2.02x10-45   | 42             | TR V gene  |
| rs739239    | 22:50050468  | G   | A   | <i>RP1.29C18.10</i>  | ENSG00000212939 | cis       | 2.29x10-45   | 42             | lncRNA     |
| rs4774967   | 15:57855760  | G   | T   | <i>GCOM1</i>         | ENSG00000137878 | cis       | 1.88x10-44   | 41.5           | PC         |
| rs7207087   | 17:46917953  | C   | G   | <i>CALCOCO2</i>      | ENSG00000136436 | cis       | 3.11x10-44   | 41.4           | PC         |
| rs7952689   | 11:7492630   | T   | G   | <i>CTD.2516F10.2</i> | ENSG00000251364 | cis       | 7.99x10-44   | 41.1           | lncRNA     |
| rs62557076  | 9:69449629   | T   | C   | <i>ANKRD20A4</i>     | ENSG00000172014 | cis       | 2.74x10-42   | 40.2           | PC         |
| rs67851010  | 6:32501347   | G   | A   | <i>HLA.DRB5</i>      | ENSG00000198502 | cis       | 4.55x10-42   | 40.1           | PC         |
| rs3179969   | 14:88862529  | G   | A   | <i>SPATA7</i>        | ENSG00000042317 | cis       | 1.43x10-41   | 39.8           | PC         |
| rs236628    | 7:75023850   | G   | T   | <i>AC006014.6</i>    | ENSG00000205583 | cis       | 2.03x10-41   | 39.7           | TCunPPG    |
| rs330924    | 8:8999187    | G   | C   | <i>RP11.10A14.3</i>  | ENSG00000254340 | cis       | 4.11x10-41   | 39.5           | lncRNA     |
| rs9408297   | 9:48559      | G   | T   | <i>WASHC1</i>        | ENSG00000181404 | cis       | 2.19x10-40   | 39.1           | PC         |
| rs12047480  | 1:198635256  | A   | G   | <i>WISP2</i>         | ENSG00000064205 | trans     | 5.28x10-40   | 38.8           | PC         |
| rs1141684   | 16:2014591   | C   | T   | <i>RP11.364L4.1</i>  | ENSG00000228981 | trans     | 3.44x10-39   | 38.3           | PC         |
| rs9264669   | 6:31239681   | A   | T   | <i>HLA.C</i>         | ENSG00000204525 | cis       | 4.11x10-39   | 38.3           | PPG        |
| rs10931780  | 2:198175297  | G   | C   | <i>AC013264.2</i>    | ENSG00000231621 | cis       | 9.22x10-39   | 38.1           | lncRNA     |
| rs76909629  | 2:68258988   | T   | C   | <i>C1D</i>           | ENSG00000197223 | cis       | 1.81x10-38   | 37.9           | PC         |
| rs10130430  | 14:37448518  | T   | C   | <i>SLC25A21</i>      | ENSG00000183032 | cis       | 2.1x10-38    | 37.8           | PC         |
| rs62072802  | 17:18490410  | A   | G   | <i>RP11.219A15.1</i> | ENSG00000266302 | trans     | 2.19x10-38   | 37.8           | PC         |
| rs61809765  | 1:149660625  | A   | G   | <i>NBPF8P</i>        | ENSG00000270231 | trans     | 1.54x10-37   | 37.3           | TCunPPG    |
| rs17816376  | 15:90233553  | T   | C   | <i>PEX11A</i>        | ENSG00000166821 | cis       | 1.88x10-37   | 37.2           | PC         |
| rs11765305  | 7:143111112  | C   | G   | <i>AC092214.10</i>   | ENSG00000229153 | cis       | 2.68x10-37   | 37.1           | PC         |
| rs2714313   | 6:7331682    | G   | C   | <i>DSP</i>           | ENSG00000096696 | cis       | 2.58x10-37   | 37.1           | lncRNA     |
| rs11772895  | 7:143081942  | G   | C   | <i>TAS2R41</i>       | ENSG00000221855 | cis       | 3.57x10-37   | 37             | PC         |
| rs5761004   | 22:23978677  | G   | A   | <i>DRICH1</i>        | ENSG00000189269 | cis       | 5.78x10-37   | 36.9           | PC         |
| rs1451659   | 11:4439535   | T   | C   | <i>OR51R1P</i>       | ENSG00000237272 | cis       | 9.34x10-37   | 36.8           | PC         |
| rs7093      | 17:3566232   | C   | T   | <i>TAX1BP3</i>       | ENSG00000213977 | cis       | 7.11x10-37   | 36.8           | unitary PG |
| rs62192251  | 2:231277825  | G   | T   | <i>RP11.634B22.4</i> | ENSG00000254467 | trans     | 1.36x10-36   | 36.6           | lncRNA     |
| rs7225024   | 17:57780223  | C   | A   | <i>TMEM148</i>       | ENSG00000179219 | trans     | 2.14x10-36   | 36.5           | PC         |
| rs7575806   | 2:201632512  | G   | C   | <i>ORC2</i>          | ENSG00000115942 | cis       | 2.52x10-36   | 36.5           | lncRNA     |
| rs16995310  | 20:1550334   | C   | A   | <i>RP4.576H24.4</i>  | ENSG00000260861 | cis       | 2.69x10-36   | 36.4           | PC         |
| rs12415     | 2:232573292  | T   | C   | <i>PTMA</i>          | ENSG00000187514 | cis       | 5.05x10-36   | 36.3           | PC         |
| rs13099099  | 3:132441268  | T   | C   | <i>NPHP3</i>         | ENSG00000113971 | cis       | 5.1x10-36    | 36.3           | PC         |
| rs2732603   | 17:44367288  | G   | C   | <i>MAPK8IP1</i>      | ENSG00000121653 | trans     | 4.15x10-36   | 36.3           | PC         |

| eQTL rs ID  | eQTL chr:pos | ref | alt | Gene symbol            | Ensembl gene ID | cis/trans | eQTL P-value           | R <sup>2</sup> | Gene type    |
|-------------|--------------|-----|-----|------------------------|-----------------|-----------|------------------------|----------------|--------------|
| rs376215580 | 1:146385910  | A   | G   | <i>NBPF12</i>          | ENSG00000268043 | trans     | 1.2x10 <sup>-35</sup>  | 36             | PC           |
| rs1510881   | 4:144439082  | T   | C   | <i>FREM3</i>           | ENSG00000183090 | cis       | 2.13x10 <sup>-35</sup> | 35.8           | PC           |
| rs28408686  | 17:30846624  | C   | G   | <i>CDK5R1</i>          | ENSG00000176749 | cis       | 3x10 <sup>-35</sup>    | 35.7           | PC           |
| rs12962555  | 18:46901634  | T   | A   | <i>RPL17.C18orf32</i>  | ENSG00000215472 | cis       | 4.32x10 <sup>-35</sup> | 35.6           | PC           |
| rs72843816  | 10:131846688 | T   | C   | <i>RP11.500G10.1</i>   | ENSG00000237489 | cis       | 7.05x10 <sup>-35</sup> | 35.5           | PC           |
| rs9273841   | 6:32629582   | C   | T   | <i>RP11.544M22.1</i>   | ENSG00000198358 | trans     | 1.66x10 <sup>-34</sup> | 35.2           | lncRNA       |
| rs375407631 | 9:66470329   | A   | G   | <i>RP11.262H14.3</i>   | ENSG00000234665 | cis       | 3.48x10 <sup>-34</sup> | 35             | lncRNA       |
| rs67651814  | 20:43598154  | G   | C   | <i>RP11.369C8.1</i>    | ENSG00000258616 | trans     | 3.62x10 <sup>-34</sup> | 35             | lncRNA       |
| rs11709127  | 3:20228009   | T   | C   | <i>AC099057.8</i>      | ENSG00000231304 | cis       | 4.87x10 <sup>-34</sup> | 34.9           | lncRNA       |
| rs62557076  | 9:69449629   | T   | C   | <i>RP11.146D12.2</i>   | ENSG00000240240 | trans     | 5.42x10 <sup>-34</sup> | 34.9           | lncRNA       |
| rs56402156  | 7:143103481  | G   | A   | <i>OR2R1P</i>          | ENSG00000236853 | cis       | 7.86x10 <sup>-34</sup> | 34.8           | TCunitary PG |
| rs7142957   | 14:21724070  | G   | A   | <i>AP002387.1</i>      | ENSG00000172900 | trans     | 6.94x10 <sup>-34</sup> | 34.8           | unitary PG   |
| rs1637340   | 7:74337634   | G   | A   | <i>GTF2IRD2</i>        | ENSG00000196275 | cis       | 1.45x10 <sup>-33</sup> | 34.6           | PC           |
| rs7146961   | 14:106993798 | C   | T   | <i>IGHV3.48</i>        | ENSG00000211964 | cis       | 1.89x10 <sup>-33</sup> | 34.5           | IG V gene    |
| rs7952890   | 12:9478318   | C   | G   | <i>RP13.735L24.1</i>   | ENSG00000260423 | cis       | 1.89x10 <sup>-33</sup> | 34.5           | lncRNA       |
| rs2505811   | 10:42872833  | G   | C   | <i>RP11.313J2.1</i>    | ENSG00000215146 | cis       | 4.63x10 <sup>-33</sup> | 34.2           | TCunPPG      |
| rs982085    | 5:137775581  | C   | G   | <i>KDM3B</i>           | ENSG00000120733 | cis       | 8.47x10 <sup>-33</sup> | 34             | PC           |
| rs522042    | 1:74666274   | C   | T   | <i>RP1.20N18.6</i>     | ENSG00000224308 | trans     | 2.52x10 <sup>-32</sup> | 33.7           | lncRNA       |
| rs72642336  | 4:68466995   | C   | A   | <i>TMPRSS11D</i>       | ENSG00000153802 | cis       | 2.79x10 <sup>-32</sup> | 33.6           | PC           |
| rs2975065   | 7:38401522   | A   | G   | <i>TRGV4</i>           | ENSG00000211698 | cis       | 3.91x10 <sup>-32</sup> | 33.5           | TR V gene    |
| rs56350361  | 11:64156776  | A   | T   | <i>AP003774.6</i>      | ENSG00000231680 | cis       | 9.39x10 <sup>-32</sup> | 33.3           | PC           |
| rs6725743   | 2:68622990   | T   | C   | <i>PLEK</i>            | ENSG00000115956 | cis       | 9.19x10 <sup>-32</sup> | 33.3           | lncRNA       |
| rs2945641   | 11:93807605  | A   | C   | <i>HEPHL1</i>          | ENSG00000181333 | cis       | 9.58x10 <sup>-32</sup> | 33.2           | PC           |
| rs1803262   | 2:87068827   | G   | A   | <i>AC108868.4</i>      | ENSG00000254126 | trans     | 1.92x10 <sup>-31</sup> | 33             | PC           |
| rs3803798   | 17:7460517   | G   | C   | <i>TNFSF12.TNFSF13</i> | ENSG00000248871 | cis       | 1.94x10 <sup>-31</sup> | 33             | PC           |
| rs10902267  | 11:1007831   | T   | C   | <i>AP2A2</i>           | ENSG00000183020 | cis       | 3.43x10 <sup>-31</sup> | 32.8           | PC           |
| rs7960229   | 12:93717719  | T   | C   | <i>RP11.511B23.2</i>   | ENSG00000257322 | cis       | 3.42x10 <sup>-31</sup> | 32.8           | lncRNA       |
| rs684552    | 1:120917635  | G   | A   | <i>NBPF8P</i>          | ENSG00000270231 | cis       | 5.66x10 <sup>-31</sup> | 32.7           | TCunPPG      |
| rs1777459   | 1:108584999  | G   | C   | <i>RP11.356N1.2</i>    | ENSG00000226822 | cis       | 6.36x10 <sup>-31</sup> | 32.6           | PC           |
| rs2523590   | 6:31327064   | T   | C   | <i>HCG4P3</i>          | ENSG00000237669 | trans     | 7.37x10 <sup>-31</sup> | 32.6           | lncRNA       |
| rs669340    | 17:18263957  | G   | C   | <i>SHMT1</i>           | ENSG00000176974 | cis       | 6.08x10 <sup>-31</sup> | 32.6           | unPPG        |
| rs2732617   | 17:44363632  | A   | C   | <i>KANSL1</i>          | ENSG00000120071 | cis       | 1.04x10 <sup>-30</sup> | 32.5           | PC           |
| rs17817950  | 17:53045325  | G   | A   | <i>STXBP4</i>          | ENSG00000166263 | cis       | 2.71x10 <sup>-30</sup> | 32.2           | PC           |
| rs9611170   | 22:39784845  | G   | C   | <i>SYNGR1</i>          | ENSG00000100321 | cis       | 3.08x10 <sup>-30</sup> | 32.1           | PC           |
| rs10448     | 19:59093239  | T   | C   | <i>RPL23AP79</i>       | ENSG00000213753 | cis       | 5.39x10 <sup>-30</sup> | 31.9           | PC           |
| rs12184651  | 13:21329029  | G   | A   | <i>EEF1AKMT1</i>       | ENSG00000150456 | cis       | 6.06x10 <sup>-30</sup> | 31.9           | PC           |
| rs17552066  | 12:27863531  | T   | C   | <i>RP11.1060J15.4</i>  | ENSG00000256377 | cis       | 5.84x10 <sup>-30</sup> | 31.9           | TCPPG        |
| rs6806332   | 3:125763566  | A   | G   | <i>ROPN1B</i>          | ENSG00000114547 | cis       | 5.27x10 <sup>-30</sup> | 31.9           | lncRNA       |
| rs3757093   | 6:2766779    | G   | A   | <i>MYLK4</i>           | ENSG00000145949 | cis       | 7.14x10 <sup>-30</sup> | 31.8           | PC           |
| rs12798684  | 11:5215042   | C   | T   | <i>AC104389.16</i>     | ENSG00000224091 | cis       | 1.42x10 <sup>-29</sup> | 31.6           | lncRNA       |
| rs3918010   | 1:36944462   | A   | G   | <i>CBLN2</i>           | ENSG00000141668 | trans     | 2.79x10 <sup>-29</sup> | 31.4           | PC           |
| rs1808209   | 17:46140291  | C   | T   | <i>HOXB2</i>           | ENSG00000173917 | cis       | 5.32x10 <sup>-29</sup> | 31.2           | PC           |
| rs143043168 | 19:22857004  | A   | G   | <i>ZNF492</i>          | ENSG00000229676 | cis       | 7.19x10 <sup>-29</sup> | 31.1           | PG           |
| rs75045569  | 7:143109208  | T   | G   | <i>OR10AC1P</i>        | ENSG00000176510 | cis       | 5.69x10 <sup>-29</sup> | 31.1           | PC           |

| eQTL rs ID  | eQTL chr:pos | ref | alt | Gene symbol          | Ensembl gene ID | cis/trans | eQTL P-value | R <sup>2</sup> | Gene type    |
|-------------|--------------|-----|-----|----------------------|-----------------|-----------|--------------|----------------|--------------|
| rs17180100  | 6:29936065   | C   | T   | <i>HLA.G</i>         | ENSG00000204632 | cis       | 1.59x10-28   | 30.8           | PC           |
| rs10081693  | 9:94966486   | T   | G   | <i>OGN</i>           | ENSG00000106809 | cis       | 2.31x10-28   | 30.7           | PC           |
| rs12124948  | 1:150527294  | C   | T   | <i>HORMAD1</i>       | ENSG00000143452 | cis       | 1.76x10-28   | 30.7           | PC           |
| rs10772397  | 12:11138683  | C   | T   | <i>TAS2R50</i>       | ENSG00000212126 | cis       | 2.98x10-28   | 30.6           | PC           |
| rs763271    | 22:27043233  | C   | G   | <i>CTA.211A9.5</i>   | ENSG00000244625 | cis       | 3.05x10-28   | 30.6           | lncRNA       |
| rs4785093   | 16:60083019  | A   | G   | <i>RP11.430C1.1</i>  | ENSG00000261807 | cis       | 3.98x10-28   | 30.5           | lncRNA       |
| rs3792988   | 6:24876260   | T   | C   | <i>RP5.1112D6.5</i>  | ENSG00000229276 | trans     | 5.41x10-28   | 30.4           | lncRNA       |
| rs73046589  | 12:10944122  | T   | C   | <i>RP11.711K1.7</i>  | ENSG00000255790 | cis       | 4.79x10-28   | 30.4           | lncRNA       |
| rs112534607 | 17:44344376  | G   | A   | <i>AC126544.4</i>    | ENSG00000204650 | cis       | 6.6x10-28    | 30.3           | TCunitary PG |
| rs62282782  | 3:195687736  | G   | C   | <i>AC069513.3</i>    | ENSG00000242086 | cis       | 6.97x10-28   | 30.3           | lncRNA       |
| rs2844827   | 6:29811237   | T   | C   | <i>HCG4P5</i>        | ENSG00000227766 | cis       | 9.03x10-28   | 30.2           | unPPG        |
| rs67933574  | 12:11226237  | A   | G   | <i>TAS2R64P</i>      | ENSG00000256274 | cis       | 7.7x10-28    | 30.2           | TCunPPG      |
| rs10794309  | 11:325948    | C   | T   | <i>RP11.326C3.15</i> | ENSG00000270972 | cis       | 1.06x10-27   | 30.1           | lncRNA       |
| rs4658519   | 1:243110266  | C   | T   | <i>CEP170P1</i>      | ENSG00000154608 | trans     | 1.69x10-27   | 30             | TCunPPG      |
| rs1133222   | 10:52516665  | C   | T   | <i>ASAH2</i>         | ENSG00000188611 | cis       | 9.34x10-27   | 29.4           | PC           |
| rs9894225   | 17:4546559   | A   | G   | <i>ALOX15</i>        | ENSG00000161905 | cis       | 9.14x10-27   | 29.4           | PC           |
| rs1043314   | 11:118915944 | A   | G   | <i>HYOU1</i>         | ENSG00000149428 | cis       | 1.75x10-26   | 29.1           | PC           |
| rs11914110  | 22:23660328  | G   | A   | <i>AP000550.1</i>    | ENSG00000169668 | trans     | 1.74x10-26   | 29.1           | TCunPPG      |
| rs2316770   | 17:43934256  | G   | A   | <i>LRRC37A3</i>      | ENSG00000176809 | trans     | 2.1x10-26    | 29.1           | PC           |
| rs9657894   | 7:150437927  | C   | T   | <i>RP5.1051J4.6</i>  | ENSG00000177590 | cis       | 2.82x10-26   | 29             | PPG          |
| rs146432789 | 5:178453100  | A   | G   | <i>ZNF879</i>        | ENSG00000234284 | cis       | 4.33x10-26   | 28.8           | TCunPPG      |
| rs6465906   | 7:102787381  | A   | C   | <i>DPY19L2P2</i>     | ENSG00000170629 | cis       | 4.21x10-26   | 28.8           | PC           |
| rs1637340   | 7:74337634   | G   | A   | <i>AC004166.5</i>    | ENSG00000123965 | cis       | 5.47x10-26   | 28.7           | PC           |
| rs57890152  | 5:149821472  | T   | C   | <i>RP11.343H5.4</i>  | ENSG00000224114 | trans     | 6.4x10-26    | 28.7           | unPPG        |
| rs72642336  | 4:68466995   | C   | A   | <i>GNRHR</i>         | ENSG00000109163 | cis       | 6.24x10-26   | 28.7           | PPG          |
| rs13081249  | 3:152092101  | T   | C   | <i>RP11.513O17.2</i> | ENSG00000253301 | trans     | 9.68x10-26   | 28.5           | lncRNA       |
| rs373427274 | 5:177218466  | C   | T   | <i>FAM153C</i>       | ENSG00000204677 | cis       | 1.23x10-25   | 28.4           | lncRNA       |
| rs10907940  | 9:42191070   | C   | A   | <i>RP11.204M4.2</i>  | ENSG00000204837 | cis       | 1.5x10-25    | 28.3           | TCunPPG      |
| rs10907940  | 9:42191070   | C   | A   | <i>RP11.111F5.5</i>  | ENSG00000227449 | trans     | 1.86x10-25   | 28.3           | TCunPPG      |
| rs143820282 | 1:1676091    | C   | T   | <i>RP1.283E3.8</i>   | ENSG00000268575 | cis       | 1.57x10-25   | 28.3           | lncRNA       |
| rs2008345   | 14:23401442  | T   | A   | <i>RP11.298I3.1</i>  | ENSG00000257285 | cis       | 1.86x10-25   | 28.3           | TCunPPG      |
| rs62027001  | 15:102317025 | T   | C   | <i>CTD.2611K5.6</i>  | ENSG00000259660 | cis       | 1.47x10-25   | 28.3           | lncRNA       |
| rs905707    | 17:72563644  | A   | G   | <i>CTD.2006K23.1</i> | ENSG00000261222 | cis       | 1.57x10-25   | 28.3           | lncRNA       |
| rs2685190   | 3:130564579  | G   | A   | <i>NEK11</i>         | ENSG00000114670 | cis       | 3.05x10-25   | 28.1           | PC           |
| rs72929707  | 2:196439583  | C   | T   | <i>AC064834.2</i>    | ENSG00000223466 | cis       | 4.24x10-25   | 28             | PC           |
| rs78821460  | 5:127874149  | G   | C   | <i>FBN2</i>          | ENSG00000138829 | cis       | 3.77x10-25   | 28             | lncRNA       |
| rs13255886  | 8:71565954   | G   | T   | <i>XKR9</i>          | ENSG00000221947 | cis       | 4.93x10-25   | 27.9           | PC           |
| rs2836200   | 21:39593581  | G   | A   | <i>AP001434.2</i>    | ENSG00000226012 | cis       | 5.35x10-25   | 27.9           | PC           |
| rs6933976   | 6:28969522   | G   | A   | <i>ZNF311</i>        | ENSG00000197935 | cis       | 5.62x10-25   | 27.9           | lncRNA       |
| rs10794309  | 11:325948    | C   | T   | <i>RP11.326C3.12</i> | ENSG00000255328 | cis       | 6.15x10-25   | 27.8           | PC           |
| rs988067    | 8:133791175  | C   | G   | <i>TG</i>            | ENSG00000042832 | cis       | 5.79x10-25   | 27.8           | lncRNA       |
| rs79379134  | 16:30292500  | A   | T   | <i>RP11.345J4.5</i>  | ENSG00000261740 | cis       | 9.43x10-25   | 27.7           | PC           |
| rs11040487  | 11:6086071   | C   | T   | <i>CTD.2008A1.2</i>  | ENSG00000259479 | trans     | 2.27x10-24   | 27.3           | PC           |
| rs114586219 | 15:82537939  | C   | A   | <i>FAM154B</i>       | ENSG00000188659 | cis       | 2.14x10-24   | 27.3           | PC           |

| eQTL rs ID  | eQTL chr:pos | ref | alt   | Gene symbol          | Ensembl gene ID | cis/trans | eQTL P-value           | R <sup>2</sup> | Gene type |
|-------------|--------------|-----|-------|----------------------|-----------------|-----------|------------------------|----------------|-----------|
| rs2982122   | 1:148002289  | C   | T     | <i>NBPF26</i>        | ENSG00000273136 | trans     | 2.72x10 <sup>-24</sup> | 27.3           | PC        |
| rs324122    | 19:52893957  | C   | T     | <i>ZNF880</i>        | ENSG00000221923 | cis       | 2.43x10 <sup>-24</sup> | 27.3           | TCunPPG   |
| rs3366      | 21:44834825  | G   | A     | <i>SIK1</i>          | ENSG00000142178 | cis       | 2.2x10 <sup>-24</sup>  | 27.3           | PC        |
| rs1985275   | 11:9000993   | A   | G     | <i>TMEM9B.AS1</i>    | ENSG00000254860 | cis       | 3.41x10 <sup>-24</sup> | 27.2           | PC        |
| rs75364523  | 17:4723121   | G   | A     | <i>CHRNE</i>         | ENSG00000108556 | cis       | 3.22x10 <sup>-24</sup> | 27.2           | lncRNA    |
| rs1056739   | 10:104236542 | T   | C     | <i>MFSD13A</i>       | ENSG00000138111 | cis       | 3.87x10 <sup>-24</sup> | 27.1           | TCunPPG   |
| rs4267298   | 16:70004028  | C   | T     | <i>CLEC18B</i>       | ENSG00000140839 | trans     | 4.39x10 <sup>-24</sup> | 27.1           | PC        |
| rs7791024   | 7:66766024   | T   | C     | <i>PMS2L4</i>        | ENSG00000067601 | cis       | 3.75x10 <sup>-24</sup> | 27.1           | PC        |
| rs11099650  | 4:85483950   | A   | C     | <i>AC005022.1</i>    | ENSG00000224017 | trans     | 5.76x10 <sup>-24</sup> | 27             | PC        |
| rs12269882  | 11:79092486  | A   | G     | <i>ODZ4</i>          | ENSG00000149256 | cis       | 4.87x10 <sup>-24</sup> | 27             | lncRNA    |
| rs7952790   | 12:68406452  | C   | T     | <i>GS1.410F4.3</i>   | ENSG00000236946 | cis       | 5.03x10 <sup>-24</sup> | 27             | TCPPG     |
| rs1892568   | 21:39563599  | T   | C     | <i>AP001434.1</i>    | ENSG00000231123 | cis       | 6.26x10 <sup>-24</sup> | 26.9           | PC        |
| rs4050880   | 22:22624189  | C   | A     | <i>IGLV5.52</i>      | ENSG00000211643 | cis       | 6.56x10 <sup>-24</sup> | 26.9           | lncRNA    |
| rs56006248  | 17:43815141  | A   | G     | <i>LRRC37A</i>       | ENSG00000176681 | cis       | 7.47x10 <sup>-24</sup> | 26.9           | PC        |
| rs639455    | 1:20978221   | C   | T     | <i>RP11.401M16.7</i> | ENSG00000117242 | cis       | 7.37x10 <sup>-24</sup> | 26.9           | IG V gene |
| rs7872739   | 9:95217930   | C   | T     | <i>ECM2</i>          | ENSG00000106823 | cis       | 6.58x10 <sup>-24</sup> | 26.9           | PPG       |
| rs3894776   | 19:1457370   | C   | T     | <i>CTB.25B13.12</i>  | ENSG00000267317 | cis       | 1.1x10 <sup>-23</sup>  | 26.7           | lncRNA    |
| rs10221200  | 17:15589734  | G   | A     | <i>TRIM16</i>        | ENSG00000221926 | cis       | 1.67x10 <sup>-23</sup> | 26.6           | PC        |
| rs1501371   | 15:82460440  | A   | C     | <i>UBE2Q2P2</i>      | ENSG00000259429 | cis       | 1.49x10 <sup>-23</sup> | 26.6           | TCPPG     |
| rs375407631 | 9:66470329   | A   | G     | <i>RP11.262H14.7</i> | ENSG00000227582 | cis       | 1.5x10 <sup>-23</sup>  | 26.6           | TCunPPG   |
| rs4006668   | 2:219595001  | C   | T     | <i>RP11.459I19.1</i> | ENSG00000272555 | cis       | 1.87x10 <sup>-23</sup> | 26.5           | PC        |
| rs77727254  | 17:30986984  | C   | T     | <i>TMEM98</i>        | ENSG00000006042 | cis       | 2.08x10 <sup>-23</sup> | 26.5           | PC        |
| rs9926      | 4:10076860   | G   | A     | <i>WDR1</i>          | ENSG00000071127 | cis       | 2.02x10 <sup>-23</sup> | 26.5           | lncRNA    |
| rs10470179  | 21:39570684  | C   | T     | <i>AC079753.4</i>    | ENSG00000180152 | trans     | 2.27x10 <sup>-23</sup> | 26.4           | PPG       |
| rs13340529  | 7:66466119   | A   | C     | <i>TYW1</i>          | ENSG00000198874 | cis       | 2.31x10 <sup>-23</sup> | 26.4           | PC        |
| rs2641419   | 11:4555193   | A   | C     | <i>OR52I2</i>        | ENSG00000226288 | cis       | 2.25x10 <sup>-23</sup> | 26.4           | lncRNA    |
| rs7898547   | 10:6659210   | A   | C     | <i>RP11.554I8.1</i>  | ENSG00000225948 | cis       | 2.58x10 <sup>-23</sup> | 26.4           | PC        |
| rs3917945   | 1:36942233   | T   | G     | <i>CA5A</i>          | ENSG00000174990 | trans     | 3.21x10 <sup>-23</sup> | 26.3           | PC        |
| rs9264682   | 6:31240872   | T   | G     | <i>HLA.K</i>         | ENSG00000230795 | trans     | 3.48x10 <sup>-23</sup> | 26.3           | unPPG     |
| rs140950438 | 5:59983635   | G   | C     | <i>DEPDC1B</i>       | ENSG00000035499 | cis       | 4.59x10 <sup>-23</sup> | 26.2           | PC        |
| rs35117338  | 7:66072781   | A   | T     | <i>GS1.124K5.12</i>  | ENSG00000229180 | cis       | 4.15x10 <sup>-23</sup> | 26.2           | PC        |
| rs3930740   | 17:8294959   | C   | T     | <i>KRBA2</i>         | ENSG00000184619 | cis       | 4.42x10 <sup>-23</sup> | 26.2           | TCunPPG   |
| rs4685744   | 3:4403537    | C   | T     | <i>AC023480.1</i>    | ENSG00000229241 | cis       | 4.24x10 <sup>-23</sup> | 26.2           | PPG       |
| rs10179864  | 2:238675892  | A   | G     | <i>RP11.255C15.1</i> | ENSG00000240429 | trans     | 5.65x10 <sup>-23</sup> | 26.1           | PC        |
| rs112161250 | 15:58440089  | G   | GCACA | <i>RP1</i>           | ENSG00000104237 | trans     | 5.3x10 <sup>-23</sup>  | 26.1           | PC        |
| rs2596496   | 6:31322782   | C   | G     | <i>HLA.B</i>         | ENSG00000234745 | cis       | 6.12x10 <sup>-23</sup> | 26.1           | PPG       |
| rs113590651 | 8:82707315   | A   | G     | <i>SNX16</i>         | ENSG00000104497 | cis       | 6.42x10 <sup>-23</sup> | 26             | PC        |
| rs1749596   | 1:236380913  | T   | C     | <i>ERO1B</i>         | ENSG00000086619 | cis       | 7.55x10 <sup>-23</sup> | 26             | PC        |
| rs2596503   | 6:31320810   | A   | G     | <i>DDX39B</i>        | ENSG00000198563 | cis       | 6.22x10 <sup>-23</sup> | 26             | PC        |
| rs12366     | 2:75185856   | G   | T     | <i>AC104135.2</i>    | ENSG00000236209 | cis       | 1.02x10 <sup>-22</sup> | 25.9           | lncRNA    |
| rs3026243   | 12:9183400   | T   | C     | <i>RP11.118B22.1</i> | ENSG00000256817 | cis       | 8.09x10 <sup>-23</sup> | 25.9           | PPG       |
| rs2285170   | 1:172425529  | C   | G     | <i>SUCO</i>          | ENSG00000094975 | cis       | 1.26x10 <sup>-22</sup> | 25.8           | PC        |
| rs7400769   | 14:94613418  | A   | T     | <i>PPP4R4</i>        | ENSG00000119698 | cis       | 1.09x10 <sup>-22</sup> | 25.8           | PC        |
| rs77972028  | 1:149674716  | G   | A     | <i>CH17.118O6.2</i>  | ENSG00000226067 | cis       | 1.15x10 <sup>-22</sup> | 25.8           | lncRNA    |
| rs7295439   | 12:89825122  | G   | T     | <i>RP11.734K2.4</i>  | ENSG00000270344 | cis       | 1.4x10 <sup>-22</sup>  | 25.7           | lncRNA    |

| eQTL rs ID  | eQTL chr:pos | ref | alt | Gene symbol          | Ensembl gene ID | cis/trans | eQTL P-value           | R <sup>2</sup> | Gene type |
|-------------|--------------|-----|-----|----------------------|-----------------|-----------|------------------------|----------------|-----------|
| rs2435201   | 17:44078982  | T   | A   | <i>RP11.995C19.3</i> | ENSG00000232300 | cis       | 1.89x10 <sup>-22</sup> | 25.6           | PC        |
| rs6502892   | 17:1617608   | T   | C   | <i>TLCD2</i>         | ENSG00000185561 | cis       | 2.17x10 <sup>-22</sup> | 25.6           | PC        |
| rs7096229   | 10:91394900  | T   | G   | <i>RP11.248C1.2</i>  | ENSG00000232229 | cis       | 1.75x10 <sup>-22</sup> | 25.6           | lncRNA    |
| rs72697606  | 8:145611531  | A   | T   | <i>CPSF1</i>         | ENSG00000071894 | cis       | 1.75x10 <sup>-22</sup> | 25.6           | lncRNA    |
| rs11657128  | 17:56048840  | G   | A   | <i>RP11.415I12.3</i> | ENSG00000249753 | trans     | 2.59x10 <sup>-22</sup> | 25.5           | lncRNA    |
| rs4013507   | 10:48303741  | G   | A   | <i>RP11.144G6.12</i> | ENSG00000254929 | trans     | 3.35x10 <sup>-22</sup> | 25.4           | lncRNA    |
| rs76549974  | 9:43793814   | C   | T   | <i>RP11.146D12.2</i> | ENSG00000240240 | trans     | 3.21x10 <sup>-22</sup> | 25.4           | lncRNA    |
| rs17442763  | 12:40538796  | T   | A   | <i>RP11.476D10.1</i> | ENSG00000260943 | cis       | 4.33x10 <sup>-22</sup> | 25.3           | PC        |
| rs3117640   | 19:55338833  | G   | A   | <i>KIR3DL1</i>       | ENSG00000167633 | cis       | 4.03x10 <sup>-22</sup> | 25.3           | PC        |
| rs368785114 | 9:45729667   | C   | A   | <i>RP11.146D12.2</i> | ENSG00000240240 | trans     | 3.94x10 <sup>-22</sup> | 25.3           | lncRNA    |
| rs7838905   | 8:2954809    | C   | G   | <i>CSMD1</i>         | ENSG00000183117 | cis       | 4.47x10 <sup>-22</sup> | 25.3           | lncRNA    |
| rs2523815   | 6:29840243   | A   | G   | <i>HLA.K</i>         | ENSG00000230795 | cis       | 5.44x10 <sup>-22</sup> | 25.2           | PC        |
| rs3087563   | 11:117707937 | T   | C   | <i>FXVD6</i>         | ENSG00000137726 | cis       | 5.38x10 <sup>-22</sup> | 25.2           | lncRNA    |
| rs6488334   | 12:11140444  | T   | C   | <i>TAS2R46</i>       | ENSG00000226761 | cis       | 5.15x10 <sup>-22</sup> | 25.2           | PC        |
| rs8073963   | 17:46609918  | G   | A   | <i>HOXB.AS1</i>      | ENSG00000230148 | cis       | 5.01x10 <sup>-22</sup> | 25.2           | lncRNA    |
| rs9368476   | 6:26906789   | A   | G   | <i>RP11.457M11.5</i> | ENSG00000261584 | cis       | 5.45x10 <sup>-22</sup> | 25.2           | unPPG     |
| rs995059    | 9:114439510  | C   | T   | <i>RP11.18M11.2</i>  | ENSG00000224812 | trans     | 5.88x10 <sup>-22</sup> | 25.2           | lncRNA    |
| rs1852270   | 17:43655280  | G   | T   | <i>LRRC37A</i>       | ENSG00000176681 | cis       | 7.65x10 <sup>-22</sup> | 25.1           | PC        |
| rs2523815   | 6:29840243   | A   | G   | <i>HCG4B</i>         | ENSG00000227262 | cis       | 6.32x10 <sup>-22</sup> | 25.1           | PC        |
| rs62050500  | 17:21446432  | G   | A   | <i>C17orf51</i>      | ENSG00000212719 | cis       | 6.93x10 <sup>-22</sup> | 25.1           | lncRNA    |
| rs6720375   | 2:132440073  | G   | C   | <i>AP000525.9</i>    | ENSG00000206195 | trans     | 7.08x10 <sup>-22</sup> | 25.1           | lncRNA    |
| rs7480474   | 11:307912    | T   | C   | <i>IFITM3</i>        | ENSG00000142089 | cis       | 6.29x10 <sup>-22</sup> | 25.1           | unPPG     |
| rs12489198  | 3:193294307  | G   | T   | <i>RP11.175P19.2</i> | ENSG00000236297 | cis       | 9.45x10 <sup>-22</sup> | 25             | PC        |
| rs8068200   | 17:45390562  | A   | G   | <i>RP11.66B24.7</i>  | ENSG00000272808 | trans     | 9.41x10 <sup>-22</sup> | 25             | TCPPG     |
| rs8077275   | 17:18705412  | G   | A   | <i>TVP23B</i>        | ENSG00000171928 | cis       | 8.76x10 <sup>-22</sup> | 25             | lncRNA    |
| rs12763558  | 10:70872970  | G   | A   | <i>VPS26A</i>        | ENSG00000122958 | cis       | 1.36x10 <sup>-21</sup> | 24.8           | PC        |
| rs879985390 | 7:101977597  | G   | A   | <i>LRWD1</i>         | ENSG00000161036 | cis       | 1.36x10 <sup>-21</sup> | 24.8           | PC        |
| rs13401870  | 2:68340446   | A   | G   | <i>CNRIP1</i>        | ENSG00000119865 | cis       | 1.82x10 <sup>-21</sup> | 24.7           | PC        |
| rs1678185   | 2:231409854  | C   | T   | <i>UNC13C</i>        | ENSG00000137766 | trans     | 2.25x10 <sup>-21</sup> | 24.6           | PC        |
| rs1834274   | 2:131951961  | G   | A   | <i>NF1L2</i>         | ENSG00000236956 | cis       | 2.38x10 <sup>-21</sup> | 24.6           | unPPG     |
| rs2388419   | 15:94400712  | G   | A   | <i>RP11.76E17.4</i>  | ENSG00000258831 | cis       | 2.38x10 <sup>-21</sup> | 24.6           | lncRNA    |
| rs10995796  | 10:51592744  | T   | G   | <i>PARGP1</i>        | ENSG00000239883 | trans     | 3.23x10 <sup>-21</sup> | 24.5           | TCunPPG   |
| rs58304714  | 1:150831561  | T   | A   | <i>RP11.732A21.2</i> | ENSG00000260008 | trans     | 3.31x10 <sup>-21</sup> | 24.5           | lncRNA    |
| rs72836318  | 17:44121579  | T   | C   | <i>RP11.798G7.8</i>  | ENSG00000266918 | cis       | 2.91x10 <sup>-21</sup> | 24.5           | lncRNA    |
| rs7897787   | 10:18921314  | C   | A   | <i>RP11.499P20.2</i> | ENSG00000240291 | cis       | 2.97x10 <sup>-21</sup> | 24.5           | TEC       |
| rs11648223  | 16:29585333  | C   | A   | <i>RP11.231C14.3</i> | ENSG00000254634 | cis       | 3.56x10 <sup>-21</sup> | 24.4           | unPPG     |
| rs12475433  | 2:173293419  | G   | T   | <i>AC078883.4</i>    | ENSG00000226963 | cis       | 5.69x10 <sup>-21</sup> | 24.2           | PC        |
| rs2490849   | 9:15388507   | C   | T   | <i>CCDC171</i>       | ENSG00000164989 | cis       | 5.6x10 <sup>-21</sup>  | 24.2           | PC        |
| rs2753747   | 10:81512832  | A   | G   | <i>NUTM2B</i>        | ENSG00000188199 | cis       | 5.76x10 <sup>-21</sup> | 24.2           | PC        |
| rs2908776   | 16:53407506  | C   | G   | <i>RP11.44F14.2</i>  | ENSG00000261804 | cis       | 5.58x10 <sup>-21</sup> | 24.2           | PC        |
| rs72744331  | 9:76788027   | T   | C   | <i>RORB</i>          | ENSG00000198963 | cis       | 6.04x10 <sup>-21</sup> | 24.2           | lncRNA    |
| rs7947900   | 11:316299    | T   | G   | <i>IFITM2</i>        | ENSG00000185201 | cis       | 6.28x10 <sup>-21</sup> | 24.2           | lncRNA    |
| rs430748    | 22:18896529  | C   | T   | <i>DGCR6</i>         | ENSG00000183628 | cis       | 8.04x10 <sup>-21</sup> | 24.1           | PC        |
| rs9761856   | 4:119579892  | G   | A   | <i>SYNPO2</i>        | ENSG00000172403 | cis       | 7.48x10 <sup>-21</sup> | 24.1           | PC        |
| rs12653907  | 5:175485237  | C   | A   | <i>RP11.844P9.5</i>  | ENSG00000248596 | cis       | 1.07x10 <sup>-20</sup> | 24             | PC        |

| eQTL rs ID  | eQTL chr:pos | ref | alt | Gene symbol          | Ensembl gene ID | cis/trans | eQTL P-value | R <sup>2</sup> | Gene type |
|-------------|--------------|-----|-----|----------------------|-----------------|-----------|--------------|----------------|-----------|
| rs190206    | 17:15464679  | G   | A   | <i>TVP23C.CDRT4</i>  | ENSG00000259024 | cis       | 1.03x10-20   | 24             | PC        |
| rs6925979   | 6:142651052  | G   | A   | <i>ADGRG6</i>        | ENSG00000112414 | cis       | 9.91x10-21   | 24             | lncRNA    |
| rs876554    | 12:89885473  | T   | C   | <i>POC1B</i>         | ENSG00000139323 | cis       | 9.87x10-21   | 24             | PC        |
| rs2377220   | 1:1660635    | T   | G   | <i>CDK11A</i>        | ENSG00000008128 | cis       | 1.3x10-20    | 23.9           | PC        |
| rs3118000   | 1:16909820   | C   | G   | <i>MST1L</i>         | ENSG00000186715 | cis       | 1.28x10-20   | 23.9           | PC        |
| rs7273242   | 20:62594160  | T   | C   | <i>SAMD10</i>        | ENSG00000130590 | cis       | 1.41x10-20   | 23.9           | TCunPPG   |
| rs72836318  | 17:44121579  | T   | C   | <i>ARL17B</i>        | ENSG00000228696 | cis       | 1.18x10-20   | 23.9           | PC        |
| rs11619622  | 13:42570201  | A   | G   | <i>VWA8</i>          | ENSG00000102763 | cis       | 1.81x10-20   | 23.8           | PC        |
| rs3095174   | 17:16254494  | C   | G   | <i>CENPV</i>         | ENSG00000166582 | cis       | 1.62x10-20   | 23.8           | PC        |
| rs3098394   | 19:12397460  | G   | A   | <i>CTD.2666L21.2</i> | ENSG00000234750 | cis       | 1.45x10-20   | 23.8           | PC        |
| rs4236478   | 7:142411527  | T   | C   | <i>U66061.35</i>     | ENSG00000244273 | cis       | 1.56x10-20   | 23.8           | PPG       |
| rs4484184   | 3:53981048   | T   | C   | <i>ACTR8</i>         | ENSG00000113812 | cis       | 1.62x10-20   | 23.8           | PPG       |
| rs12975429  | 19:33199227  | G   | A   | <i>NUDT19</i>        | ENSG00000213965 | cis       | 1.97x10-20   | 23.7           | PC        |
| rs3102342   | 16:89451575  | T   | C   | <i>RP1.168P16.1</i>  | ENSG00000261692 | cis       | 1.96x10-20   | 23.7           | lncRNA    |
| rs6960171   | 7:64910100   | G   | A   | <i>RP11.792A8.4</i>  | ENSG00000272831 | cis       | 1.95x10-20   | 23.7           | lncRNA    |
| rs1042229   | 19:52249672  | A   | C   | <i>FPR1</i>          | ENSG00000171051 | cis       | 2.34x10-20   | 23.6           | PC        |
| rs7829886   | 8:95497388   | T   | A   | <i>KIAA1429</i>      | ENSG00000164944 | cis       | 2.53x10-20   | 23.6           | PC        |
| rs2373340   | 7:148001246  | A   | G   | <i>CNTNAP2</i>       | ENSG00000174469 | trans     | 3.68x10-20   | 23.5           | PC        |
| rs1375862   | 9:125617037  | G   | A   | <i>ZBTB26</i>        | ENSG00000171448 | cis       | 4.57x10-20   | 23.4           | PC        |
| rs72689277  | 4:185593699  | G   | A   | <i>PRIMPOL</i>       | ENSG00000164306 | cis       | 4.62x10-20   | 23.4           | PC        |
| rs1051664   | 1:45116985   | C   | T   | <i>RNF220</i>        | ENSG00000187147 | cis       | 5.82x10-20   | 23.3           | PC        |
| rs2003490   | 14:75377555  | C   | A   | <i>DLST</i>          | ENSG00000119689 | cis       | 5.97x10-20   | 23.3           | PC        |
| rs7350611   | 12:11331094  | T   | C   | <i>TAS2R13</i>       | ENSG00000212128 | cis       | 5.99x10-20   | 23.3           | PC        |
| rs112413396 | 4:70278401   | T   | C   | <i>UGT2B28</i>       | ENSG00000135226 | cis       | 7.37x10-20   | 23.2           | PC        |
| rs28652789  | 16:83807     | G   | C   | <i>DDX11L10</i>      | ENSG00000233614 | cis       | 6.36x10-20   | 23.2           | PC        |
| rs56104184  | 19:49370310  | C   | T   | <i>PPP1R15A</i>      | ENSG00000087074 | cis       | 6.84x10-20   | 23.2           | TCunPPG   |
| rs12704823  | 7:76822127   | C   | T   | <i>AC073635.5</i>    | ENSG00000250990 | cis       | 8.66x10-20   | 23.1           | PC        |
| rs867663893 | 3:122443492  | A   | T   | <i>DIRC2</i>         | ENSG00000138463 | cis       | 8.2x10-20    | 23.1           | lncRNA    |
| rs13333072  | 16:8823848   | A   | G   | <i>ABAT</i>          | ENSG00000183044 | cis       | 1.12x10-19   | 23             | PC        |
| rs142929928 | 17:4783340   | C   | G   | <i>C17orf107</i>     | ENSG00000205710 | cis       | 1.08x10-19   | 23             | PPG       |
| rs2286466   | 16:2014283   | A   | G   | <i>RPS2P46</i>       | ENSG00000189343 | trans     | 1.21x10-19   | 23             | PC        |
| rs6085271   | 20:5748056   | T   | C   | <i>C20orf196</i>     | ENSG00000171984 | cis       | 1.29x10-19   | 22.9           | PC        |
| rs987534    | 8:120713652  | G   | A   | <i>DSCC1</i>         | ENSG00000136982 | cis       | 1.48x10-19   | 22.9           | PC        |
| rs9796412   | 14:77211737  | C   | T   | <i>RP11.488C13.5</i> | ENSG00000258301 | cis       | 1.64x10-19   | 22.8           | lncRNA    |
| rs11076704  | 16:88777995  | C   | T   | <i>CTU2</i>          | ENSG00000174177 | cis       | 2.33x10-19   | 22.7           | PC        |
| rs1355775   | 6:52529358   | G   | A   | <i>RP1.152L7.5</i>   | ENSG00000216775 | cis       | 2.05x10-19   | 22.7           | PC        |
| rs76312359  | 15:55829689  | A   | T   | <i>PYGO1</i>         | ENSG00000171016 | cis       | 2.14x10-19   | 22.7           | PC        |
| rs9514837   | 13:108995148 | G   | C   | <i>MYO16</i>         | ENSG00000041515 | cis       | 1.99x10-19   | 22.7           | TCunPPG   |
| rs12167058  | 22:29907401  | C   | T   | <i>RP11.638L3.3</i>  | ENSG00000265555 | trans     | 2.65x10-19   | 22.6           | PC        |
| rs2769345   | 6:167366394  | T   | C   | <i>RP11.514O12.4</i> | ENSG00000249141 | cis       | 2.7x10-19    | 22.6           | PC        |
| rs35940311  | 1:93663604   | G   | A   | <i>DR1</i>           | ENSG00000117505 | cis       | 2.7x10-19    | 22.6           | PC        |
| rs9272779   | 6:32610314   | T   | C   | <i>HLA.DQA1</i>      | ENSG00000196735 | cis       | 2.64x10-19   | 22.6           | lncRNA    |
| rs162298    | 6:167455629  | G   | A   | <i>NPTXR</i>         | ENSG00000221890 | trans     | 3.28x10-19   | 22.5           | PC        |
| rs58581511  | 17:57950621  | T   | G   | <i>RNFT1</i>         | ENSG00000189050 | cis       | 3.39x10-19   | 22.5           | PC        |
| rs2588347   | 12:10944783  | A   | G   | <i>TAS2R31</i>       | ENSG00000256436 | cis       | 4.88x10-19   | 22.4           | PC        |

| eQTL rs ID  | eQTL chr:pos | ref | alt | Gene symbol           | Ensembl gene ID | cis/trans | eQTL P-value | R <sup>2</sup> | Gene type |
|-------------|--------------|-----|-----|-----------------------|-----------------|-----------|--------------|----------------|-----------|
| rs7718927   | 5:109907035  | A   | T   | <i>TMEM232</i>        | ENSG00000186952 | cis       | 3.99x10-19   | 22.4           | PC        |
| rs12216750  | 8:82066711   | T   | A   | <i>RP11.1149M10.2</i> | ENSG00000253214 | cis       | 7.12x10-19   | 22.2           | PC        |
| rs12464694  | 2:196908927  | A   | G   | <i>DNAH7</i>          | ENSG00000118997 | cis       | 6.41x10-19   | 22.2           | PC        |
| rs2924251   | 17:46338677  | A   | G   | <i>HOXB3</i>          | ENSG00000120093 | cis       | 6.45x10-19   | 22.2           | PC        |
| rs4674336   | 2:219632820  | A   | G   | <i>PRKAG3</i>         | ENSG00000115592 | cis       | 6.31x10-19   | 22.2           | lncRNA    |
| rs586746    | 19:53080928  | A   | G   | <i>ZNF701</i>         | ENSG00000167562 | cis       | 9.73x10-19   | 22.1           | PC        |
| rs1873379   | 15:75498744  | G   | C   | <i>RP11.817O13.8</i>  | ENSG00000260274 | cis       | 1.22x10-18   | 22             | PC        |
| rs2302058   | 19:57703077  | T   | G   | <i>ZNF264</i>         | ENSG00000083844 | cis       | 1.15x10-18   | 22             | PPG       |
| rs2832328   | 21:30821767  | C   | G   | <i>RP11.313P22.1</i>  | ENSG00000273464 | cis       | 9.97x10-19   | 22             | lncRNA    |
| rs6589587   | 11:116875338 | T   | G   | <i>AP000936.1</i>     | ENSG00000234268 | cis       | 1.16x10-18   | 22             | lncRNA    |
| rs10400906  | 15:83297138  | C   | T   | <i>CPEB1</i>          | ENSG00000214575 | cis       | 1.43x10-18   | 21.9           | PC        |
| rs2780681   | 10:27512767  | A   | G   | <i>RP11.85G18.4</i>   | ENSG00000230445 | cis       | 1.29x10-18   | 21.9           | PC        |
| rs61148413  | 15:84828326  | T   | A   | <i>GOLGA6L4</i>       | ENSG00000184206 | cis       | 1.48x10-18   | 21.9           | PC        |
| rs7223043   | 17:33826654  | A   | G   | <i>RP11.1094M14.8</i> | ENSG00000267369 | cis       | 1.37x10-18   | 21.9           | TCPPG     |
| rs8058597   | 16:70082214  | G   | C   | <i>NP1PB15</i>        | ENSG00000196436 | trans     | 1.44x10-18   | 21.9           | PPG       |
| rs145475856 | 1:146367867  | G   | T   | <i>PFN1P8</i>         | ENSG00000244371 | cis       | 1.66x10-18   | 21.8           | PC        |
| rs62371990  | 5:42604782   | G   | A   | <i>CCDC152</i>        | ENSG00000198865 | cis       | 1.76x10-18   | 21.8           | PPG       |
| rs2588347   | 12:10944783  | A   | G   | <i>TAS2R12</i>        | ENSG00000256682 | cis       | 2.05x10-18   | 21.7           | lncRNA    |
| rs964611    | 15:48597514  | C   | A   | <i>RP5.898J17.1</i>   | ENSG00000231987 | trans     | 2.43x10-18   | 21.7           | TCPPG     |
| rs7223732   | 17:45881197  | G   | C   | <i>SCRN2</i>          | ENSG00000141295 | cis       | 3.08x10-18   | 21.6           | PC        |
| rs9893390   | 17:33751315  | T   | A   | <i>RP11.686D22.3</i>  | ENSG00000267648 | cis       | 3.09x10-18   | 21.6           | TCPPG     |
| rs10079553  | 5:178959047  | C   | T   | <i>RUFY1</i>          | ENSG00000176783 | cis       | 3.54x10-18   | 21.5           | PC        |
| rs12728538  | 1:63959125   | A   | C   | <i>ITGB3BP</i>        | ENSG00000142856 | cis       | 3.25x10-18   | 21.5           | PC        |
| rs12939821  | 17:62079286  | G   | A   | <i>PRR29</i>          | ENSG00000224383 | cis       | 3.75x10-18   | 21.5           | PC        |
| rs200276266 | 5:175530214  | C   | T   | <i>FAM153A</i>        | ENSG00000170074 | trans     | 3.13x10-18   | 21.5           | PC        |
| rs4744150   | 9:95630363   | C   | T   | <i>RP11.526D8.3</i>   | ENSG00000226721 | cis       | 3.44x10-18   | 21.5           | PC        |
| rs78042407  | 10:49333147  | G   | C   | <i>AGAP9</i>          | ENSG00000204172 | trans     | 3.35x10-18   | 21.5           | PPG       |
| rs10125553  | 9:37841380   | A   | G   | <i>DCAF10</i>         | ENSG00000122741 | cis       | 4.48x10-18   | 21.4           | PC        |
| rs144921768 | 16:32973407  | G   | A   | <i>DUSP22</i>         | ENSG00000112679 | trans     | 5.91x10-18   | 21.3           | PC        |
| rs2450556   | 8:95330332   | A   | C   | <i>FSBP</i>           | ENSG00000265817 | cis       | 7.31x10-18   | 21.2           | PC        |
| rs4083651   | 9:19211852   | A   | G   | <i>RP11.513M16.8</i>  | ENSG00000273226 | cis       | 7.64x10-18   | 21.2           | lncRNA    |
| rs11659948  | 18:9197372   | A   | G   | <i>RP11.63E9.1</i>    | ENSG00000259828 | trans     | 9.25x10-18   | 21.1           | PC        |
| rs12718958  | 7:55431162   | A   | G   | <i>LANCL2</i>         | ENSG00000132434 | cis       | 8.91x10-18   | 21.1           | lncRNA    |
| rs2873872   | 17:49508445  | A   | T   | <i>RP11.1018N14.5</i> | ENSG00000267452 | cis       | 8.46x10-18   | 21.1           | lncRNA    |
| rs6558530   | 8:1706207    | A   | G   | <i>AC093375.1</i>     | ENSG00000226383 | trans     | 8.42x10-18   | 21.1           | lncRNA    |
| rs116918202 | 16:89587080  | C   | T   | <i>CDK10</i>          | ENSG00000185324 | cis       | 1.17x10-17   | 21             | PC        |
| rs1817303   | 10:51450060  | A   | C   | <i>RP11.546J1.1</i>   | ENSG00000270557 | trans     | 1.05x10-17   | 21             | lncRNA    |
| rs9412607   | 9:42901002   | T   | G   | <i>RP11.745L13.2</i>  | ENSG00000251555 | trans     | 1.16x10-17   | 21             | lncRNA    |
| rs10405910  | 19:57961191  | A   | T   | <i>AC004076.9</i>     | ENSG00000268163 | cis       | 1.43x10-17   | 20.9           | PC        |
| rs179468    | 22:24109774  | T   | G   | <i>CHCHD10</i>        | ENSG00000250479 | cis       | 1.49x10-17   | 20.9           | lncRNA    |
| rs2671827   | 17:33732330  | C   | T   | <i>RP11.686D22.8</i>  | ENSG00000267745 | cis       | 1.35x10-17   | 20.9           | PC        |
| rs73153794  | 7:134853085  | A   | C   | <i>RP11.90K6.1</i>    | ENSG00000239482 | trans     | 1.47x10-17   | 20.9           | lncRNA    |
| rs9353446   | 6:87780724   | T   | C   | <i>C6orf163</i>       | ENSG00000203872 | cis       | 1.36x10-17   | 20.9           | PC        |
| rs111277130 | 5:1634070    | C   | T   | <i>CTD.2083E4.4</i>   | ENSG00000260774 | trans     | 1.62x10-17   | 20.8           | PC        |
| rs1128894   | 1:153604422  | T   | C   | <i>S100A1</i>         | ENSG00000160678 | cis       | 1.66x10-17   | 20.8           | PC        |

| eQTL rs ID  | eQTL chr:pos | ref | alt | Gene symbol           | Ensembl gene ID | cis/trans | eQTL P-value           | R <sup>2</sup> | Gene type    |
|-------------|--------------|-----|-----|-----------------------|-----------------|-----------|------------------------|----------------|--------------|
| rs1367224   | 2:175391901  | T   | C   | <i>AC018890.6</i>     | ENSG00000236449 | cis       | 1.54x10 <sup>-17</sup> | 20.8           | PC           |
| rs67425176  | 8:66543064   | T   | C   | <i>CTD.3025N20.3</i>  | ENSG00000272010 | cis       | 1.76x10 <sup>-17</sup> | 20.8           | lncRNA       |
| rs6816018   | 4:88735959   | G   | C   | <i>SPP1</i>           | ENSG00000118785 | cis       | 1.76x10 <sup>-17</sup> | 20.8           | lncRNA       |
| rs73213579  | 4:198953     | C   | A   | <i>SOHLH2</i>         | ENSG00000120669 | trans     | 1.55x10 <sup>-17</sup> | 20.8           | lncRNA       |
| rs1007591   | 11:35731800  | T   | G   | <i>TRIM44</i>         | ENSG00000166326 | cis       | 2.05x10 <sup>-17</sup> | 20.7           | PC           |
| rs11009104  | 10:33116039  | A   | G   | <i>CCDC7</i>          | ENSG00000216937 | cis       | 1.89x10 <sup>-17</sup> | 20.7           | PC           |
| rs13081249  | 3:152092101  | T   | C   | <i>ANO7</i>           | ENSG00000146205 | trans     | 2.22x10 <sup>-17</sup> | 20.7           | PC           |
| rs529150802 | 16:89268323  | G   | T   | <i>FANCA</i>          | ENSG00000187741 | cis       | 2.14x10 <sup>-17</sup> | 20.7           | PC           |
| rs11150958  | 18:74248237  | A   | G   | <i>RP11.17M16.2</i>   | ENSG00000265778 | cis       | 2.56x10 <sup>-17</sup> | 20.6           | lncRNA       |
| rs2075458   | 7:130528147  | A   | G   | <i>AC058791.1</i>     | ENSG00000226380 | cis       | 2.68x10 <sup>-17</sup> | 20.6           | lncRNA       |
| rs2732617   | 17:44363632  | A   | C   | <i>MKRN9P</i>         | ENSG00000258128 | trans     | 2.57x10 <sup>-17</sup> | 20.6           | TCPPG        |
| rs591411    | 9:79313529   | C   | T   | <i>PCA3</i>           | ENSG00000225937 | cis       | 2.84x10 <sup>-17</sup> | 20.6           | lncRNA       |
| rs62469316  | 7:64674302   | T   | G   | <i>RP11.792A8.4</i>   | ENSG00000272831 | trans     | 2.47x10 <sup>-17</sup> | 20.6           | lncRNA       |
| rs2416548   | 12:11324176  | C   | A   | <i>SMIM10L1</i>       | ENSG00000256537 | cis       | 3.19x10 <sup>-17</sup> | 20.5           | PC           |
| rs4472162   | 4:79626160   | A   | T   | <i>RP11.109G23.3</i>  | ENSG00000260278 | cis       | 3.41x10 <sup>-17</sup> | 20.5           | lncRNA       |
| rs1541533   | 11:17096211  | A   | G   | <i>SNORD14A</i>       | ENSG00000272034 | cis       | 4.41x10 <sup>-17</sup> | 20.4           | PC           |
| rs1967415   | 17:57113124  | C   | A   | <i>TRIM37</i>         | ENSG00000108395 | cis       | 4.04x10 <sup>-17</sup> | 20.4           | PC           |
| rs1982074   | 19:10668673  | A   | G   | <i>KRI1</i>           | ENSG00000129347 | cis       | 4.16x10 <sup>-17</sup> | 20.4           | PC           |
| rs373769561 | 9:41922713   | G   | C   | <i>RP11.262H14.3</i>  | ENSG00000234665 | trans     | 3.89x10 <sup>-17</sup> | 20.4           | lncRNA       |
| rs7105835   | 11:78075725  | T   | C   | <i>RP11.452H21.1</i>  | ENSG00000254420 | cis       | 3.74x10 <sup>-17</sup> | 20.4           | lncRNA       |
| rs7837964   | 8:22264417   | G   | C   | <i>SLC39A14</i>       | ENSG00000104635 | cis       | 3.8x10 <sup>-17</sup>  | 20.4           | snoRNA       |
| rs11078300  | 17:2571489   | G   | A   | <i>PAFAH1B1</i>       | ENSG00000007168 | cis       | 5.31x10 <sup>-17</sup> | 20.3           | PC           |
| rs11249686  | 5:177181014  | A   | G   | <i>FAM153B</i>        | ENSG00000182230 | trans     | 5.13x10 <sup>-17</sup> | 20.3           | PC           |
| rs2730272   | 7:158798622  | G   | C   | <i>LINC00689</i>      | ENSG00000231419 | cis       | 4.96x10 <sup>-17</sup> | 20.3           | PC           |
| rs492095    | 17:72869078  | A   | G   | <i>FDXR</i>           | ENSG00000161513 | cis       | 4.85x10 <sup>-17</sup> | 20.3           | lncRNA       |
| rs11186721  | 10:93641908  | C   | A   | <i>AC005307.1</i>     | ENSG00000260725 | trans     | 6.82x10 <sup>-17</sup> | 20.2           | PC           |
| rs376869011 | 9:66530411   | A   | G   | <i>FGF7</i>           | ENSG00000140285 | trans     | 5.72x10 <sup>-17</sup> | 20.2           | lncRNA       |
| rs9893390   | 17:33751315  | T   | A   | <i>RP11.686D22.4</i>  | ENSG00000267547 | cis       | 6.18x10 <sup>-17</sup> | 20.2           | lncRNA       |
| rs12514888  | 5:34221989   | G   | A   | <i>RP11.1023L17.2</i> | ENSG00000215156 | cis       | 7.93x10 <sup>-17</sup> | 20.1           | PPG          |
| rs3127726   | 10:46932364  | T   | C   | <i>RP11.144G6.12</i>  | ENSG00000254929 | cis       | 7.76x10 <sup>-17</sup> | 20.1           | TCunitary PG |
| rs35858034  | 19:41299864  | A   | C   | <i>CYP2T2P</i>        | ENSG00000233622 | cis       | 7.39x10 <sup>-17</sup> | 20.1           | lncRNA       |
| rs11209243  | 1:68738861   | G   | C   | <i>RP11.518D3.3</i>   | ENSG00000234383 | cis       | 9.9x10 <sup>-17</sup>  | 20             | PC           |
| rs11799352  | 1:118576627  | A   | T   | <i>SPAG17</i>         | ENSG00000155761 | cis       | 1.06x10 <sup>-16</sup> | 20             | TCPPG        |
| rs150134394 | 10:81455053  | T   | C   | <i>RP11.119F19.4</i>  | ENSG00000224886 | cis       | 1.09x10 <sup>-16</sup> | 20             | PPG          |
| rs4968290   | 17:45047384  | C   | T   | <i>RP11.156P1.3</i>   | ENSG00000262879 | cis       | 1.02x10 <sup>-16</sup> | 20             | unPPG        |
| rs61920361  | 12:27165921  | A   | T   | <i>RP11.582E3.4</i>   | ENSG00000256625 | cis       | 9x10 <sup>-17</sup>    | 20             | lncRNA       |
| rs10752555  | 9:70484945   | A   | G   | <i>RP11.262H14.3</i>  | ENSG00000234665 | trans     | 1.23x10 <sup>-16</sup> | 19.9           | PC           |
| rs4624506   | 3:39444901   | T   | C   | <i>SLC25A38</i>       | ENSG00000144659 | cis       | 1.29x10 <sup>-16</sup> | 19.9           | PC           |
| rs55962832  | 3:40244451   | T   | C   | <i>ENTPD3</i>         | ENSG00000168032 | cis       | 1.34x10 <sup>-16</sup> | 19.9           | lncRNA       |
| rs10772397  | 12:11138683  | C   | T   | <i>TAS2R19</i>        | ENSG00000212124 | cis       | 1.43x10 <sup>-16</sup> | 19.8           | PC           |
| rs34511016  | 5:79881909   | A   | G   | <i>FAM151B</i>        | ENSG00000152380 | cis       | 1.59x10 <sup>-16</sup> | 19.8           | PC           |
| rs677078    | 11:121432287 | C   | A   | <i>RP11.86H7.1</i>    | ENSG00000224081 | trans     | 1.58x10 <sup>-16</sup> | 19.8           | PC           |
| rs72642346  | 4:68479934   | C   | T   | <i>AC079880.1</i>     | ENSG00000232398 | cis       | 1.6x10 <sup>-16</sup>  | 19.8           | PC           |
| rs7839535   | 8:134586637  | A   | G   | <i>RP11.629O1.2</i>   | ENSG00000261220 | cis       | 1.54x10 <sup>-16</sup> | 19.8           | TCPPG        |

| eQTL rs ID  | eQTL chr:pos | ref | alt   | Gene symbol               | Ensembl gene ID | cis/trans | eQTL P-value           | R <sup>2</sup> | Gene type |
|-------------|--------------|-----|-------|---------------------------|-----------------|-----------|------------------------|----------------|-----------|
| rs9353446   | 6:87780724   | T   | C     | <i>SMIM8</i>              | ENSG00000111850 | cis       | 1.61x10 <sup>-16</sup> | 19.8           | unPPG     |
| NA          | 17:80735913  | C   | CCTCA | <i>ARL16</i>              | ENSG00000214087 | trans     | 1.69x10 <sup>-16</sup> | 19.8           | lncRNA    |
| rs132650    | 22:36554588  | C   | T     | <i>CADPS</i>              | ENSG00000163618 | trans     | 1.72x10 <sup>-16</sup> | 19.7           | PC        |
| rs2388419   | 15:94400712  | G   | A     | <i>RP11.76E17.3</i>       | ENSG00000258476 | cis       | 2.05x10 <sup>-16</sup> | 19.7           | PPG       |
| rs4585080   | 2:99557327   | T   | C     | <i>AC019097.7</i>         | ENSG00000231822 | cis       | 1.74x10 <sup>-16</sup> | 19.7           | lncRNA    |
| rs71409258  | 15:80159117  | A   | G     | <i>ST20.MTHFS</i>         | ENSG00000259332 | cis       | 1.85x10 <sup>-16</sup> | 19.7           | PC        |
| rs10771996  | 12:9811352   | A   | G     | <i>AC003005.2</i>         | ENSG00000268266 | trans     | 2.16x10 <sup>-16</sup> | 19.6           | PC        |
| rs2008758   | 17:19893590  | C   | T     | <i>AKAP10</i>             | ENSG00000108599 | cis       | 2.15x10 <sup>-16</sup> | 19.6           | PC        |
| rs2531805   | 6:28412326   | C   | T     | <i>ZSCAN23</i>            | ENSG00000187987 | cis       | 2.16x10 <sup>-16</sup> | 19.6           | PC        |
| rs28549275  | 7:138886066  | C   | T     | <i>LUC7L2</i>             | ENSG00000146963 | cis       | 2.25x10 <sup>-16</sup> | 19.6           | PC        |
| rs3785884   | 17:44057595  | G   | A     | <i>LRRC37A2</i>           | ENSG00000238083 | cis       | 2.33x10 <sup>-16</sup> | 19.6           | lncRNA    |
| rs7962354   | 12:62823325  | T   | C     | <i>RP11.769N19.2</i>      | ENSG00000257880 | cis       | 2.17x10 <sup>-16</sup> | 19.6           | lncRNA    |
| rs2309426   | 9:71830308   | T   | G     | <i>TJP2</i>               | ENSG00000119139 | cis       | 3.17x10 <sup>-16</sup> | 19.5           | PC        |
| rs2945247   | 8:8096004    | G   | A     | <i>ABC11.48400900C8.1</i> | ENSG00000254527 | trans     | 2.78x10 <sup>-16</sup> | 19.5           | PC        |
| rs374559823 | 2:87366345   | C   | T     | <i>RGPD1</i>              | ENSG00000187627 | cis       | 3.17x10 <sup>-16</sup> | 19.5           | PC        |
| rs61811182  | 1:183585327  | A   | G     | <i>SCGB3A2</i>            | ENSG00000164265 | trans     | 2.9x10 <sup>-16</sup>  | 19.5           | PC        |
| rs74651789  | 4:165898682  | C   | T     | <i>TRIM61</i>             | ENSG00000183439 | cis       | 2.78x10 <sup>-16</sup> | 19.5           | PPG       |
| rs116044941 | 17:73874684  | G   | C     | <i>RP11.552F3.9</i>       | ENSG00000267801 | cis       | 3.44x10 <sup>-16</sup> | 19.4           | PC        |
| rs3106150   | 17:62919344  | G   | A     | <i>DND1P1</i>             | ENSG00000264070 | trans     | 3.86x10 <sup>-16</sup> | 19.4           | PC        |
| rs743810    | 22:35742925  | T   | G     | <i>TOM1</i>               | ENSG00000100284 | cis       | 3.68x10 <sup>-16</sup> | 19.4           | PPG       |
| rs9895898   | 17:18644142  | T   | C     | <i>TRIM16L</i>            | ENSG00000108448 | cis       | 3.64x10 <sup>-16</sup> | 19.4           | lncRNA    |
| rs11052771  | 12:9891371   | C   | T     | <i>RP11.75L1.2</i>        | ENSG00000213443 | cis       | 4.3x10 <sup>-16</sup>  | 19.3           | PC        |
| rs2169764   | 19:14193735  | G   | A     | <i>CTB.5506.8</i>         | ENSG00000141854 | cis       | 4.49x10 <sup>-16</sup> | 19.3           | PPG       |
| rs2540431   | 2:202367621  | G   | T     | <i>AC007256.5</i>         | ENSG00000213090 | cis       | 4.58x10 <sup>-16</sup> | 19.3           | PPG       |
| rs2949585   | 1:148002266  | A   | C     | <i>NBPF8P</i>             | ENSG00000270231 | trans     | 4.35x10 <sup>-16</sup> | 19.3           | lncRNA    |
| rs9289971   | 3:156389947  | T   | C     | <i>RP11.791I24.4</i>      | ENSG00000243926 | cis       | 4.07x10 <sup>-16</sup> | 19.3           | TCunPPG   |
| rs7978962   | 12:10524824  | T   | C     | <i>RP11.277P12.6</i>      | ENSG00000255641 | cis       | 5.07x10 <sup>-16</sup> | 19.2           | PC        |
| rs111527470 | 2:239149377  | G   | C     | <i>AC016757.3</i>         | ENSG00000186235 | cis       | 6.53x10 <sup>-16</sup> | 19.1           | TCunPPG   |
| rs11912319  | 22:50937900  | A   | G     | <i>CTA.384D8.34</i>       | ENSG00000273272 | cis       | 6.52x10 <sup>-16</sup> | 19.1           | PC        |
| rs148853830 | 7:99912929   | A   | T     | <i>PMS2L1</i>             | ENSG00000078319 | cis       | 6.27x10 <sup>-16</sup> | 19.1           | lncRNA    |
| rs2569102   | 5:149800881  | G   | C     | <i>RPS14</i>              | ENSG00000164587 | cis       | 6.29x10 <sup>-16</sup> | 19.1           | lncRNA    |
| rs2611491   | 10:51489393  | T   | G     | <i>CTGLF10P</i>           | ENSG00000230869 | trans     | 7.32x10 <sup>-16</sup> | 19.1           | TCPPG     |
| rs28625723  | 7:135715783  | T   | C     | <i>AC024084.1</i>         | ENSG00000230649 | cis       | 6.27x10 <sup>-16</sup> | 19.1           | lncRNA    |
| rs7216865   | 17:6891851   | A   | T     | <i>AC027763.2</i>         | ENSG00000215067 | cis       | 7.26x10 <sup>-16</sup> | 19.1           | unPPG     |
| rs9834      | 5:176733616  | T   | C     | <i>RP11.753G20.1</i>      | ENSG00000217325 | trans     | 7.16x10 <sup>-16</sup> | 19.1           | lncRNA    |
| rs509421    | 1:24035696   | G   | A     | <i>CNR2</i>               | ENSG00000188822 | cis       | 8.01x10 <sup>-16</sup> | 19             | PC        |
| rs11048496  | 12:9172421   | G   | A     | <i>AP000688.11</i>        | ENSG00000236677 | trans     | 1.15x10 <sup>-15</sup> | 18.9           | PC        |
| rs11640445  | 16:60195615  | T   | A     | <i>RP11.430C1.1</i>       | ENSG00000261807 | cis       | 1.07x10 <sup>-15</sup> | 18.9           | lncRNA    |
| rs218663    | 17:6567190   | A   | G     | <i>CTC.281F24.1</i>       | ENSG00000261996 | cis       | 9.55x10 <sup>-16</sup> | 18.9           | lncRNA    |
| rs2530839   | 17:28964727  | C   | T     | <i>RP11.271K11.2</i>      | ENSG00000264943 | cis       | 1.12x10 <sup>-15</sup> | 18.9           | lncRNA    |
| rs4657614   | 1:166899261  | A   | G     | <i>ILDR2</i>              | ENSG00000143195 | cis       | 9.94x10 <sup>-16</sup> | 18.9           | PPG       |
| rs12441089  | 15:93277514  | T   | C     | <i>RP11.386M24.4</i>      | ENSG00000258741 | cis       | 1.32x10 <sup>-15</sup> | 18.8           | PC        |
| rs12482295  | 21:15263797  | C   | T     | <i>RP11.757O6.2</i>       | ENSG00000265787 | trans     | 1.42x10 <sup>-15</sup> | 18.8           | TCPPG     |
| rs12917526  | 15:81025457  | G   | C     | <i>FAM108C1</i>           | ENSG00000136379 | cis       | 1.45x10 <sup>-15</sup> | 18.8           | TCunPPG   |
| rs115654156 | 6:31395040   | G   | C     | <i>MICA</i>               | ENSG00000204520 | cis       | 1.55x10 <sup>-15</sup> | 18.7           | PC        |

| eQTL rs ID  | eQTL chr:pos | ref | alt   | Gene symbol           | Ensembl gene ID | cis/trans | eQTL P-value           | R <sup>2</sup> | Gene type  |
|-------------|--------------|-----|-------|-----------------------|-----------------|-----------|------------------------|----------------|------------|
| rs4649586   | 1:144611851  | G   | A     | <i>CH17.11806.2</i>   | ENSG00000226067 | trans     | 1.47x10 <sup>-15</sup> | 18.7           | lncRNA     |
| rs60545295  | 15:48521101  | G   | A     | <i>CTB.43E15.3</i>    | ENSG00000253686 | trans     | 1.59x10 <sup>-15</sup> | 18.7           | lncRNA     |
| rs10136164  | 14:37483309  | T   | C     | <i>PAX9</i>           | ENSG00000198807 | cis       | 1.89x10 <sup>-15</sup> | 18.6           | PC         |
| rs10752555  | 9:70484945   | A   | G     | <i>FGF7</i>           | ENSG00000140285 | trans     | 1.9x10 <sup>-15</sup>  | 18.6           | PC         |
| rs11655481  | 17:30622552  | C   | T     | <i>CYP4F11</i>        | ENSG00000171903 | trans     | 1.85x10 <sup>-15</sup> | 18.6           | PC         |
| rs1808199   | 6:29924542   | G   | T     | <i>SPINK1</i>         | ENSG00000164266 | trans     | 1.9x10 <sup>-15</sup>  | 18.6           | PC         |
| rs2005594   | 22:19021819  | A   | G     | <i>AC000095.8</i>     | ENSG00000241527 | cis       | 2.12x10 <sup>-15</sup> | 18.6           | PC         |
| rs489552    | 9:27196617   | C   | T     | <i>RP11.56F10.3</i>   | ENSG00000254396 | cis       | 2.13x10 <sup>-15</sup> | 18.6           | unitary PG |
| rs79710144  | 10:17723145  | T   | A     | <i>FAT3</i>           | ENSG00000165323 | trans     | 1.94x10 <sup>-15</sup> | 18.6           | lncRNA     |
| rs2353408   | 3:142791030  | A   | C     | <i>U2SURP</i>         | ENSG00000163714 | cis       | 2.48x10 <sup>-15</sup> | 18.5           | PC         |
| rs34499924  | 11:60970328  | A   | G     | <i>PGA3</i>           | ENSG00000229859 | cis       | 2.58x10 <sup>-15</sup> | 18.5           | lncRNA     |
| rs375809946 | 5:175499074  | G   | A     | <i>FAM153C</i>        | ENSG00000204677 | trans     | 2.57x10 <sup>-15</sup> | 18.5           | PC         |
| rs7531159   | 1:74653039   | C   | T     | <i>FPGT.TNNI3K</i>    | ENSG00000259030 | cis       | 2.33x10 <sup>-15</sup> | 18.5           | lncRNA     |
| rs7835354   | 8:19564149   | A   | G     | <i>RP11.1105O14.1</i> | ENSG00000253270 | cis       | 2.35x10 <sup>-15</sup> | 18.5           | PC         |
| rs3904094   | 13:37683479  | T   | C     | <i>VMAC</i>           | ENSG00000187650 | trans     | 2.86x10 <sup>-15</sup> | 18.4           | PC         |
| rs9949547   | 18:37381312  | T   | C     | <i>RP11.244M2.1</i>   | ENSG00000267374 | cis       | 3.34x10 <sup>-15</sup> | 18.4           | lncRNA     |
| rs201958810 | 10:47097863  | G   | GTCTC | <i>AGAP9</i>          | ENSG00000204172 | cis       | 3.92x10 <sup>-15</sup> | 18.3           | PC         |
| rs3865258   | 17:18709492  | T   | C     | <i>TVP23C</i>         | ENSG00000175106 | trans     | 4x10 <sup>-15</sup>    | 18.3           | PC         |
| rs3915878   | 4:144915780  | C   | T     | <i>RP11.248J18.2</i>  | ENSG00000269906 | trans     | 3.92x10 <sup>-15</sup> | 18.3           | PC         |
| rs4579515   | 8:59476807   | A   | G     | <i>AC068522.4</i>     | ENSG00000242970 | cis       | 3.73x10 <sup>-15</sup> | 18.3           | PPG        |
| rs72805116  | 16:85792967  | A   | G     | <i>C16orf74</i>       | ENSG00000154102 | cis       | 3.57x10 <sup>-15</sup> | 18.3           | lncRNA     |
| rs112697442 | 14:35580186  | C   | T     | <i>SEPT7P1</i>        | ENSG00000259090 | cis       | 4.51x10 <sup>-15</sup> | 18.2           | PPG        |
| rs1411476   | 1:104569468  | C   | T     | <i>RP11.364B6.2</i>   | ENSG00000215869 | cis       | 5.64x10 <sup>-15</sup> | 18.1           | PC         |
| rs142863425 | 6:27885980   | C   | T     | <i>ZNF389</i>         | ENSG00000226314 | cis       | 6.07x10 <sup>-15</sup> | 18.1           | PC         |
| rs17216887  | 4:100010273  | C   | G     | <i>RP11.696N14.1</i>  | ENSG00000246090 | cis       | 5.73x10 <sup>-15</sup> | 18.1           | PC         |
| rs2269984   | 7:141362693  | A   | T     | <i>RP5.894A10.6</i>   | ENSG00000270157 | cis       | 5.46x10 <sup>-15</sup> | 18.1           | PC         |
| rs2314645   | 4:15538922   | G   | T     | <i>ADRB3</i>          | ENSG00000188778 | trans     | 5.99x10 <sup>-15</sup> | 18.1           | PC         |
| rs2315601   | 17:39086932  | C   | T     | <i>KRT23</i>          | ENSG00000108244 | cis       | 6.04x10 <sup>-15</sup> | 18.1           | TCPPG      |
| rs2739337   | 22:24296483  | C   | T     | <i>DDT</i>            | ENSG00000099977 | cis       | 6.23x10 <sup>-15</sup> | 18.1           | TCunPPG    |
| rs2831947   | 21:30022213  | A   | G     | <i>CCT8</i>           | ENSG00000156261 | cis       | 5.57x10 <sup>-15</sup> | 18.1           | lncRNA     |
| rs28565512  | 4:57397196   | C   | G     | <i>THEGL</i>          | ENSG00000249693 | cis       | 6.34x10 <sup>-15</sup> | 18.1           | PC         |
| rs797515    | 13:51227415  | G   | A     | <i>DLEU7</i>          | ENSG00000186047 | cis       | 5.67x10 <sup>-15</sup> | 18.1           | lncRNA     |
| rs113734006 | 8:59345027   | C   | T     | <i>UBXN2B</i>         | ENSG00000215114 | cis       | 7.6x10 <sup>-15</sup>  | 18             | PC         |
| rs1991401   | 17:62502435  | A   | G     | <i>DDX5</i>           | ENSG00000108654 | cis       | 6.94x10 <sup>-15</sup> | 18             | PC         |
| rs4273875   | 8:2585105    | T   | C     | <i>GS1.57L11.1</i>    | ENSG00000253853 | cis       | 6.5x10 <sup>-15</sup>  | 18             | PC         |
| rs77245739  | 16:4801939   | G   | T     | <i>ZNF500</i>         | ENSG00000103199 | cis       | 7.53x10 <sup>-15</sup> | 18             | PC         |
| rs78095701  | 17:66443609  | A   | C     | <i>WIP1</i>           | ENSG00000070540 | cis       | 6.42x10 <sup>-15</sup> | 18             | lncRNA     |
| rs112521249 | 14:35244362  | C   | T     | <i>RP11.73E17.2</i>   | ENSG00000258738 | cis       | 8.3x10 <sup>-15</sup>  | 17.9           | PC         |
| rs11631833  | 15:75588262  | G   | A     | <i>CTD.2323K18.1</i>  | ENSG00000260269 | cis       | 9.14x10 <sup>-15</sup> | 17.9           | PC         |
| rs11668526  | 19:54749060  | C   | T     | <i>LILRA6</i>         | ENSG00000244482 | cis       | 8.6x10 <sup>-15</sup>  | 17.9           | PC         |
| rs4141794   | 7:130667258  | G   | A     | <i>AMER2</i>          | ENSG00000165566 | trans     | 7.86x10 <sup>-15</sup> | 17.9           | PC         |
| rs4687658   | 3:52860366   | C   | G     | <i>RP5.966M1.6</i>    | ENSG00000243696 | cis       | 8.27x10 <sup>-15</sup> | 17.9           | TCunPPG    |
| rs4804785   | 19:7780643   | A   | C     | <i>CLEC4G</i>         | ENSG00000182566 | cis       | 7.95x10 <sup>-15</sup> | 17.9           | PPG        |
| rs56053835  | 15:85093046  | G   | A     | <i>UBE2Q2P1</i>       | ENSG00000189136 | cis       | 8.47x10 <sup>-15</sup> | 17.9           | PC         |

| eQTL rs ID  | eQTL chr:pos | ref | alt | Gene symbol          | Ensembl gene ID | cis/trans | eQTL P-value | R <sup>2</sup> | Gene type    |
|-------------|--------------|-----|-----|----------------------|-----------------|-----------|--------------|----------------|--------------|
| rs708277    | 16:54147935  | G   | A   | <i>FTO</i>           | ENSG00000140718 | cis       | 9.17x10-15   | 17.9           | PC           |
| rs78622635  | 1:16538094   | A   | G   | <i>ARHGEF19</i>      | ENSG00000142632 | cis       | 8.34x10-15   | 17.9           | lncRNA       |
| rs9842198   | 3:156539204  | G   | C   | <i>PA2G4P4</i>       | ENSG00000230457 | cis       | 8.35x10-15   | 17.9           | lncRNA       |
| rs10151105  | 14:62549004  | G   | A   | <i>RP11.355I22.3</i> | ENSG00000186369 | cis       | 1.14x10-14   | 17.8           | PC           |
| rs11653833  | 17:15592143  | C   | G   | <i>ZNF286B</i>       | ENSG00000249459 | trans     | 1.07x10-14   | 17.8           | PC           |
| rs12927623  | 16:34021783  | A   | G   | <i>DUSP22</i>        | ENSG00000112679 | trans     | 1.05x10-14   | 17.8           | TCunitary PG |
| rs2712204   | 7:107148544  | A   | T   | <i>GPR22</i>         | ENSG00000172209 | cis       | 1.14x10-14   | 17.8           | NA           |
| rs2985424   | 1:145386391  | A   | G   | <i>RP11.458D21.5</i> | ENSG00000213240 | cis       | 1.04x10-14   | 17.8           | lncRNA       |
| rs34352889  | 10:88974706  | G   | A   | <i>RP11.506M13.3</i> | ENSG00000244733 | trans     | 1.11x10-14   | 17.8           | TCunPPG      |
| rs11118912  | 1:222149130  | C   | T   | <i>RP11.815M8.1</i>  | ENSG00000238042 | cis       | 1.42x10-14   | 17.7           | PC           |
| rs11743541  | 5:75738858   | G   | A   | <i>CTD.2236F14.1</i> | ENSG00000249713 | cis       | 1.39x10-14   | 17.7           | PC           |
| rs2454705   | 12:123192848 | G   | A   | <i>RP11.324E6.6</i>  | ENSG00000256249 | cis       | 1.28x10-14   | 17.7           | lncRNA       |
| rs2961559   | 10:4864809   | T   | C   | <i>AKR1E2</i>        | ENSG00000165568 | cis       | 1.39x10-14   | 17.7           | PC           |
| rs35775224  | 7:7015632    | A   | C   | <i>RP11.266K4.12</i> | ENSG00000256589 | trans     | 1.27x10-14   | 17.7           | lncRNA       |
| rs56288025  | 19:58963717  | G   | T   | <i>ZNF324B</i>       | ENSG00000249471 | cis       | 1.19x10-14   | 17.7           | lncRNA       |
| rs60163605  | 17:43334649  | C   | A   | <i>SPATA32</i>       | ENSG00000184361 | cis       | 1.3x10-14    | 17.7           | unPPG        |
| rs1227809   | 19:37269981  | G   | C   | <i>ZNF790</i>        | ENSG00000197863 | cis       | 1.51x10-14   | 17.6           | PC           |
| rs12814509  | 12:21613367  | A   | T   | <i>PYROXD1</i>       | ENSG00000121350 | cis       | 1.47x10-14   | 17.6           | PC           |
| rs200210467 | 14:59983185  | T   | G   | <i>CCDC175</i>       | ENSG00000151838 | cis       | 1.79x10-14   | 17.6           | PC           |
| rs2904758   | 6:29923351   | G   | A   | <i>HLA.W</i>         | ENSG00000235290 | cis       | 1.46x10-14   | 17.6           | lncRNA       |
| rs62147427  | 2:87126664   | C   | T   | <i>RP1.81D8.3</i>    | ENSG00000224477 | trans     | 1.46x10-14   | 17.6           | unPPG        |
| rs1803005   | 6:24804860   | G   | T   | <i>C6orf229</i>      | ENSG00000260286 | cis       | 1.82x10-14   | 17.5           | PC           |
| rs2271089   | 17:79210707  | G   | A   | <i>C17orf89</i>      | ENSG00000224877 | cis       | 2.47x10-14   | 17.4           | PC           |
| rs2942202   | 8:23418444   | A   | C   | <i>PRDM6</i>         | ENSG00000061455 | trans     | 2.31x10-14   | 17.4           | PC           |
| rs76021834  | 7:75607155   | A   | G   | <i>MDH2</i>          | ENSG00000146701 | cis       | 2.26x10-14   | 17.4           | PC           |
| rs10081693  | 9:94966486   | T   | G   | <i>ASPEN</i>         | ENSG00000106819 | cis       | 2.89x10-14   | 17.3           | PC           |
| rs10255707  | 7:45954692   | T   | C   | <i>AC073115.7</i>    | ENSG00000229628 | cis       | 2.8x10-14    | 17.3           | PC           |
| rs12168582  | 22:28316227  | A   | G   | <i>TTC28</i>         | ENSG00000100154 | cis       | 2.71x10-14   | 17.3           | PC           |
| rs1883595   | 6:40935728   | G   | A   | <i>APOBEC2</i>       | ENSG00000124701 | cis       | 2.86x10-14   | 17.3           | PC           |
| rs251732    | 16:4310468   | C   | G   | <i>TFAP4</i>         | ENSG00000090447 | cis       | 2.81x10-14   | 17.3           | lncRNA       |
| rs3807891   | 7:95226709   | G   | C   | <i>AC002451.3</i>    | ENSG00000231170 | cis       | 3.19x10-14   | 17.3           | lncRNA       |
| rs62065454  | 17:43573592  | A   | G   | <i>RP11.156P1.1</i>  | ENSG00000263142 | trans     | 2.86x10-14   | 17.3           | TCunPPG      |
| rs12453507  | 17:38053207  | C   | G   | <i>GSDMB</i>         | ENSG00000073605 | cis       | 3.96x10-14   | 17.2           | PC           |
| rs147751661 | 17:62927969  | G   | A   | <i>RP11.197O15.1</i> | ENSG00000214401 | trans     | 3.73x10-14   | 17.2           | PC           |
| rs4754708   | 11:100759034 | A   | G   | <i>ARHGAP42</i>      | ENSG00000165895 | cis       | 3.34x10-14   | 17.2           | lncRNA       |
| rs12539729  | 7:128142023  | A   | T   | <i>METTL2B</i>       | ENSG00000165055 | cis       | 4.3x10-14    | 17.1           | PC           |
| rs4647870   | 17:74516655  | A   | C   | <i>SNHG16</i>        | ENSG00000163597 | cis       | 4.25x10-14   | 17.1           | lncRNA       |
| rs4736693   | 8:134553603  | G   | C   | <i>ERICH3</i>        | ENSG00000178965 | trans     | 4.79x10-14   | 17.1           | PC           |
| rs58173607  | 18:74277779  | G   | T   | <i>RP11.111H3.2</i>  | ENSG00000266256 | cis       | 4.99x10-14   | 17.1           | PC           |
| rs60659886  | 1:26994245   | A   | T   | <i>PIGV</i>          | ENSG00000060642 | cis       | 4.33x10-14   | 17.1           | PC           |
| rs7082545   | 10:52478100  | T   | G   | <i>ASAH2B</i>        | ENSG00000204147 | cis       | 4.11x10-14   | 17.1           | lncRNA       |
| rs73359005  | 8:135795757  | G   | A   | <i>AC083843.1</i>    | ENSG00000259820 | cis       | 4.85x10-14   | 17.1           | lncRNA       |
| rs11042607  | 11:2121817   | A   | G   | <i>IGF2</i>          | ENSG00000167244 | cis       | 5.15x10-14   | 17             | PC           |
| rs117491574 | 17:58325048  | T   | G   | <i>RP11.3K24.1</i>   | ENSG00000241157 | cis       | 5.02x10-14   | 17             | PC           |

| eQTL rs ID  | eQTL chr:pos | ref | alt | Gene symbol               | Ensembl gene ID | cis/trans | eQTL P-value | R <sup>2</sup> | Gene type |
|-------------|--------------|-----|-----|---------------------------|-----------------|-----------|--------------|----------------|-----------|
| rs11951414  | 5:68431872   | C   | T   | <i>RP11.309M7.1</i>       | ENSG00000261298 | trans     | 5.85x10-14   | 17             | PC        |
| rs17259058  | 7:87921277   | C   | G   | <i>AC003991.3</i>         | ENSG00000228113 | cis       | 5.72x10-14   | 17             | PC        |
| rs2230707   | 1:19202896   | G   | A   | <i>ALDH4A1</i>            | ENSG00000159423 | cis       | 5.13x10-14   | 17             | lncRNA    |
| rs34630775  | 8:79417693   | G   | T   | <i>RP11.578O24.2</i>      | ENSG00000254352 | cis       | 5.17x10-14   | 17             | PPG       |
| rs71473137  | 15:30948494  | C   | T   | <i>RP11.932O9.9</i>       | ENSG00000269930 | cis       | 5.45x10-14   | 17             | PPG       |
| rs72751993  | 1:233468388  | T   | C   | <i>RP5.862P8.2</i>        | ENSG00000143674 | cis       | 5.21x10-14   | 17             | lncRNA    |
| rs867845230 | 17:62920612  | A   | G   | <i>RP11.583F2.1</i>       | ENSG00000264057 | cis       | 6.09x10-14   | 17             | TCunPPG   |
| rs9303577   | 17:49249186  | C   | A   | <i>NME1.NME2</i>          | ENSG00000011052 | cis       | 6.08x10-14   | 17             | lncRNA    |
| rs1665294   | 2:114369935  | T   | G   | <i>AC016629.3</i>         | ENSG00000269600 | trans     | 6.24x10-14   | 16.9           | PC        |
| rs61978213  | 14:70653758  | G   | A   | <i>SLC8A3</i>             | ENSG00000100678 | cis       | 6.89x10-14   | 16.9           | lncRNA    |
| rs12149595  | 16:35259917  | G   | A   | <i>DUSP22</i>             | ENSG00000112679 | trans     | 9.01x10-14   | 16.8           | PC        |
| rs3115858   | 1:755890     | A   | T   | <i>FAM87B</i>             | ENSG00000177757 | cis       | 7.68x10-14   | 16.8           | PC        |
| rs6503453   | 17:44062603  | A   | G   | <i>AC007679.3</i>         | ENSG00000225610 | trans     | 9.16x10-14   | 16.8           | lncRNA    |
| rs6866645   | 5:137988944  | A   | G   | <i>LRRTM2</i>             | ENSG00000146006 | cis       | 7.63x10-14   | 16.8           | lncRNA    |
| rs1852270   | 17:43655280  | G   | T   | <i>LRRC37A3</i>           | ENSG00000176809 | trans     | 1.02x10-13   | 16.7           | PC        |
| rs28709161  | 22:22646562  | T   | C   | <i>RP11.23E10.3</i>       | ENSG00000260626 | trans     | 9.88x10-14   | 16.7           | lncRNA    |
| rs7446704   | 5:70662060   | C   | A   | <i>RP11.1280N14.4</i>     | ENSG00000215630 | cis       | 9.27x10-14   | 16.7           | unPPG     |
| rs10907576  | 9:46918872   | A   | G   | <i>RP11.262H14.3</i>      | ENSG00000234665 | trans     | 1.14x10-13   | 16.6           | lncRNA    |
| rs12603589  | 17:65825248  | T   | C   | <i>AC005332.1</i>         | ENSG00000237854 | cis       | 1.15x10-13   | 16.6           | PC        |
| rs13122     | 14:31359024  | A   | T   | <i>RP11.829H16.3</i>      | ENSG00000258525 | cis       | 1.17x10-13   | 16.6           | PC        |
| rs3016125   | 22:20475050  | T   | C   | <i>TMEM191C</i>           | ENSG00000206140 | trans     | 1.15x10-13   | 16.6           | PC        |
| rs3106149   | 17:62919455  | G   | A   | <i>RP11.798G7.3</i>       | ENSG00000214425 | trans     | 1.3x10-13    | 16.6           | TCunPPG   |
| rs62307246  | 4:70295728   | A   | C   | <i>UGT2B11</i>            | ENSG00000213759 | cis       | 1.19x10-13   | 16.6           | lncRNA    |
| rs62542381  | 9:27488566   | C   | T   | <i>RP11.120I21.2</i>      | ENSG00000254202 | trans     | 1.13x10-13   | 16.6           | TCunPPG   |
| rs75655792  | 7:99813285   | C   | A   | <i>PVRIG</i>              | ENSG00000213413 | cis       | 1.14x10-13   | 16.6           | lncRNA    |
| rs184608345 | 9:66584918   | C   | T   | <i>RP11.745L13.2</i>      | ENSG00000251555 | trans     | 1.42x10-13   | 16.5           | lncRNA    |
| rs185073    | 5:179334857  | A   | G   | <i>TBC1D9B</i>            | ENSG00000197226 | cis       | 1.61x10-13   | 16.5           | PC        |
| rs2562240   | 16:83458     | A   | G   | <i>AP006222.1</i>         | ENSG00000228463 | trans     | 1.63x10-13   | 16.5           | PC        |
| rs28551168  | 1:229456185  | C   | T   | <i>CCSAP</i>              | ENSG00000154429 | cis       | 1.5x10-13    | 16.5           | PC        |
| rs4356723   | 20:24899051  | T   | C   | <i>ACSS1</i>              | ENSG00000154930 | cis       | 1.63x10-13   | 16.5           | PC        |
| rs56248825  | 21:39465015  | C   | T   | <i>SCAMP4</i>             | ENSG00000227500 | trans     | 1.54x10-13   | 16.5           | PC        |
| rs59812768  | 1:198599981  | T   | C   | <i>RP11.55L3.1</i>        | ENSG00000250791 | trans     | 1.59x10-13   | 16.5           | TCPPG     |
| rs77913677  | 3:122038460  | T   | C   | <i>KPNA1</i>              | ENSG00000114030 | cis       | 1.52x10-13   | 16.5           | lncRNA    |
| rs113352051 | 2:89283617   | T   | C   | <i>IGKV1.9</i>            | ENSG00000241755 | cis       | 1.69x10-13   | 16.4           | lncRNA    |
| rs148240181 | 12:93080     | C   | G   | <i>ABC7.42389800N19.1</i> | ENSG00000226210 | cis       | 1.9x10-13    | 16.4           | PC        |
| rs1641716   | 12:12224718  | G   | A   | <i>BCL2L14</i>            | ENSG00000121380 | cis       | 1.84x10-13   | 16.4           | unPPG     |
| rs4798075   | 18:3247256   | A   | C   | <i>RP13.270P17.3</i>      | ENSG00000272688 | cis       | 2x10-13      | 16.4           | IG V gene |
| rs62253656  | 3:53023428   | G   | C   | <i>RP11.894J14.5</i>      | ENSG00000272305 | cis       | 1.84x10-13   | 16.4           | PC        |
| rs1035559   | 16:72031860  | A   | G   | <i>DHX38</i>              | ENSG00000140829 | cis       | 2.43x10-13   | 16.3           | lncRNA    |
| rs1046381   | 1:153604112  | G   | A   | <i>RP1.178F15.5</i>       | ENSG00000271853 | cis       | 2.34x10-13   | 16.3           | PC        |
| rs13063033  | 3:46082481   | G   | A   | <i>RP11.793E15.1</i>      | ENSG00000229515 | cis       | 2.47x10-13   | 16.3           | PC        |
| rs2396690   | 6:46618289   | C   | G   | <i>TDRD6</i>              | ENSG00000180113 | cis       | 2.26x10-13   | 16.3           | PC        |
| rs2644720   | 11:10859439  | C   | T   | <i>SNORD97</i>            | ENSG00000238622 | cis       | 2.12x10-13   | 16.3           | PC        |
| rs372107064 | 5:21303103   | G   | C   | <i>RP11.457M11.5</i>      | ENSG00000261584 | trans     | 2.15x10-13   | 16.3           | PPG       |
| rs55699816  | 3:196059377  | A   | T   | <i>TCTEX1D2</i>           | ENSG00000213123 | cis       | 2.36x10-13   | 16.3           | snoRNA    |

| eQTL rs ID  | eQTL chr:pos | ref | alt   | Gene symbol    | Ensembl gene ID | cis/trans | eQTL P-value | R <sup>2</sup> | Gene type |
|-------------|--------------|-----|-------|----------------|-----------------|-----------|--------------|----------------|-----------|
| rs6718328   | 2:198038562  | G   | A     | PPP2R2C        | ENSG00000074211 | trans     | 2.28x10-13   | 16.3           | lncRNA    |
| rs1784304   | 11:118962816 | C   | A     | HMBS           | ENSG00000256269 | cis       | 2.69x10-13   | 16.2           | lncRNA    |
| rs4542712   | 17:7469327   | T   | C     | AC113189.5     | ENSG00000233223 | cis       | 2.67x10-13   | 16.2           | PC        |
| rs67654984  | 8:135707982  | G   | A     | CTD.2342N23.3  | ENSG00000272456 | cis       | 2.54x10-13   | 16.2           | PPG       |
| rs7145650   | 14:35947295  | G   | A     | RP11.287A8.2   | ENSG00000229419 | trans     | 2.69x10-13   | 16.2           | lncRNA    |
| rs7537908   | 1:78518939   | A   | G     | GIPC2          | ENSG00000137960 | cis       | 2.81x10-13   | 16.2           | PPG       |
| rs80284522  | 3:139035188  | T   | C     | RP11.319G6.1   | ENSG00000248932 | cis       | 2.74x10-13   | 16.2           | lncRNA    |
| rs869738    | 2:64493422   | C   | G     | AC114752.2     | ENSG00000236148 | cis       | 2.8x10-13    | 16.2           | PC        |
| rs10025792  | 4:164504947  | T   | G     | RP11.557L19.1  | ENSG00000272002 | trans     | 3.15x10-13   | 16.1           | lncRNA    |
| rs11027831  | 11:3550720   | C   | T     | CTC.342M10.2   | ENSG00000255367 | cis       | 3.15x10-13   | 16.1           | PC        |
| rs11186897  | 10:94048558  | C   | G     | Mar-05         | ENSG00000198060 | cis       | 3.08x10-13   | 16.1           | PC        |
| rs1817104   | 12:11338589  | G   | T     | TAS2R63P       | ENSG00000256019 | cis       | 3.3x10-13    | 16.1           | PC        |
| rs200601667 | 2:107117022  | A   | AATTT | AC108868.4     | ENSG00000254126 | cis       | 3.5x10-13    | 16.1           | PC        |
| rs4782394   | 16:88726726  | T   | G     | RP5.1142A6.3   | ENSG00000260630 | cis       | 3.46x10-13   | 16.1           | PC        |
| rs5744709   | 5:74891002   | G   | A     | ANKDD1B        | ENSG00000189045 | cis       | 3.64x10-13   | 16.1           | PPG       |
| rs62461484  | 7:63911740   | T   | C     | ERV3.1         | ENSG00000213462 | cis       | 3.14x10-13   | 16.1           | PC        |
| rs6737901   | 2:169936393  | A   | G     | DHRS9          | ENSG00000073737 | cis       | 3.71x10-13   | 16.1           | lncRNA    |
| rs76330394  | 7:102791112  | A   | C     | RP11.401L13.4  | ENSG00000224415 | cis       | 3.21x10-13   | 16.1           | unPPG     |
| rs796704680 | 15:32838699  | T   | C     | GOLGA8R        | ENSG00000186399 | trans     | 3.19x10-13   | 16.1           | lncRNA    |
| rs13238996  | 7:74069645   | A   | G     | GTF2IRD2B      | ENSG00000174428 | cis       | 4.44x10-13   | 16             | lncRNA    |
| rs17692129  | 17:44793283  | C   | T     | RP11.927P21.12 | ENSG00000271974 | trans     | 3.87x10-13   | 16             | PC        |
| rs530569    | 11:94169708  | C   | T     | MIR548A1       | ENSG00000207775 | trans     | 3.88x10-13   | 16             | miRNA     |
| rs142893200 | 15:84897901  | A   | G     | GOLGA6L9       | ENSG00000197978 | trans     | 5.41x10-13   | 15.9           | TCPPG     |
| rs61842918  | 10:47746978  | C   | A     | ANXA8          | ENSG00000265190 | cis       | 5.59x10-13   | 15.9           | PC        |
| rs62118921  | 19:23798289  | C   | T     | ZNF681         | ENSG00000196172 | cis       | 5.24x10-13   | 15.9           | PC        |
| rs184608345 | 9:66584918   | C   | T     | RP11.204M4.2   | ENSG00000204837 | trans     | 6.15x10-13   | 15.8           | PC        |
| rs188871467 | 16:8928935   | T   | G     | RP11.77H9.2    | ENSG00000260276 | cis       | 5.68x10-13   | 15.8           | PC        |
| rs6770645   | 3:40227789   | G   | A     | MYRIP          | ENSG00000170011 | cis       | 6.02x10-13   | 15.8           | PC        |
| rs7399685   | 13:114516947 | A   | G     | TMEM255B       | ENSG00000184497 | cis       | 6.17x10-13   | 15.8           | TCunPPG   |
| rs11123747  | 2:99328763   | T   | C     | GABRB2         | ENSG00000145864 | trans     | 7.04x10-13   | 15.7           | lncRNA    |
| rs142893200 | 15:84897901  | A   | G     | RP11.152F13.3  | ENSG00000255769 | trans     | 8.07x10-13   | 15.7           | PC        |
| rs146957881 | 5:177233117  | C   | A     | RP11.1277A3.2  | ENSG00000246596 | cis       | 7.75x10-13   | 15.7           | PC        |
| rs200690889 | 9:44544142   | G   | A     | RP11.111F5.5   | ENSG00000227449 | trans     | 8.27x10-13   | 15.7           | TCunPPG   |
| rs202086943 | 20:29602222  | T   | G     | MLLT10P1       | ENSG00000238151 | cis       | 7.66x10-13   | 15.7           | TCunPPG   |
| rs4476463   | 3:36880858   | A   | G     | AC011816.1     | ENSG00000234073 | cis       | 7.43x10-13   | 15.7           | PPG       |
| rs57947330  | 17:16728955  | T   | C     | CCDC144A       | ENSG00000170160 | cis       | 7.87x10-13   | 15.7           | PPG       |
| rs57947330  | 17:16728955  | T   | C     | USP32P1        | ENSG00000188933 | cis       | 7.53x10-13   | 15.7           | TCunPPG   |
| rs61998439  | 15:31111123  | G   | T     | RP11.540B6.6   | ENSG00000270015 | cis       | 7.72x10-13   | 15.7           | NA        |
| rs74651789  | 4:165898682  | C   | T     | RP11.366M4.11  | ENSG00000248632 | cis       | 7.4x10-13    | 15.7           | TCunPPG   |
| rs11052241  | 12:9811948   | A   | G     | RP3.337H4.8    | ENSG00000203362 | trans     | 8.33x10-13   | 15.6           | NA        |
| rs17216887  | 4:100010273  | C   | G     | ADH6           | ENSG00000172955 | cis       | 8.98x10-13   | 15.6           | PC        |
| rs3783164   | 13:41380363  | C   | T     | RP11.346L13.3  | ENSG00000168852 | cis       | 8.68x10-13   | 15.6           | PC        |
| rs4242389   | 8:22972321   | G   | A     | POU5F1B        | ENSG00000212993 | trans     | 9.81x10-13   | 15.6           | PC        |
| rs56065326  | 3:112008771  | C   | T     | SLC9C1         | ENSG00000172139 | cis       | 8.44x10-13   | 15.6           | TCunPPG   |
| rs56185013  | 4:106160133  | G   | A     | TET2           | ENSG00000168769 | cis       | 9.51x10-13   | 15.6           | PC        |

| eQTL rs ID  | eQTL chr:pos | ref | alt | Gene symbol         | Ensembl gene ID | cis/trans | eQTL P-value | R <sup>2</sup> | Gene type |
|-------------|--------------|-----|-----|---------------------|-----------------|-----------|--------------|----------------|-----------|
| rs61809245  | 1:148203960  | G   | A   | <i>NBPF20</i>       | ENSG00000162825 | trans     | 8.88x10-13   | 15.6           | PC        |
| rs62364993  | 5:80514325   | G   | C   | <i>CKMT2</i>        | ENSG00000131730 | cis       | 8.58x10-13   | 15.6           | PC        |
| rs6488334   | 12:11140444  | T   | C   | <i>TAS2R30</i>      | ENSG00000256188 | cis       | 9.02x10-13   | 15.6           | lncRNA    |
| rs72905231  | 2:191303525  | A   | G   | <i>NEMP2</i>        | ENSG00000189362 | cis       | 9.05x10-13   | 15.6           | PC        |
| rs77391378  | 21:29947914  | T   | A   | <i>AF131217.1</i>   | ENSG00000232855 | cis       | 9.87x10-13   | 15.6           | lncRNA    |
| rs776296    | 7:63804337   | T   | A   | <i>ZNF736</i>       | ENSG00000234444 | cis       | 8.84x10-13   | 15.6           | PC        |
| rs1233578   | 6:28712247   | A   | G   | <i>BTN3A2</i>       | ENSG00000186470 | trans     | 1.14x10-12   | 15.5           | PC        |
| rs2697291   | 2:198111312  | A   | G   | <i>RP11.794P6.1</i> | ENSG00000255428 | trans     | 1.12x10-12   | 15.5           | PC        |
| rs61979250  | 14:76668905  | C   | G   | <i>GPATCH2L</i>     | ENSG00000089916 | cis       | 1.09x10-12   | 15.5           | PC        |
| rs34019730  | 16:89812930  | G   | A   | <i>FANCA</i>        | ENSG00000187741 | cis       | 1.24x10-12   | 15.4           | lncRNA    |
| rs35084227  | 2:87277202   | T   | C   | <i>PLG</i>          | ENSG00000122194 | trans     | 1.25x10-12   | 15.4           | PC        |
| rs35785032  | 4:175697250  | G   | A   | <i>ADAM29</i>       | ENSG00000168594 | cis       | 1.49x10-12   | 15.4           | PC        |
| rs372161775 | 5:175398456  | A   | G   | <i>THOC3</i>        | ENSG00000051596 | cis       | 1.29x10-12   | 15.4           | PC        |
| rs41265179  | 1:153601828  | G   | T   | <i>NUP210L</i>      | ENSG00000143552 | cis       | 1.4x10-12    | 15.4           | PC        |
| rs10584     | 15:90328551  | G   | C   | <i>ANPEP</i>        | ENSG00000166825 | cis       | 1.72x10-12   | 15.3           | PC        |
| rs11246329  | 11:843713    | C   | T   | <i>TSPAN4</i>       | ENSG00000214063 | cis       | 1.72x10-12   | 15.3           | PC        |
| rs12812329  | 12:9167788   | T   | C   | <i>RP11.436I9.3</i> | ENSG00000255776 | cis       | 1.54x10-12   | 15.3           | PC        |
| rs2684556   | 17:44580533  | A   | G   | <i>RP11.156P1.1</i> | ENSG00000263142 | cis       | 1.56x10-12   | 15.3           | PC        |
| rs3807020   | 6:41747048   | G   | C   | <i>OR56A1</i>       | ENSG00000180934 | trans     | 1.62x10-12   | 15.3           | PC        |
| rs56175172  | 11:77245728  | A   | G   | <i>AP000580.1</i>   | ENSG00000219529 | cis       | 1.51x10-12   | 15.3           | PPG       |
| rs61945858  | 12:120879461 | A   | G   | <i>DYNLL1</i>       | ENSG00000088986 | cis       | 1.62x10-12   | 15.3           | PPG       |
| rs62414240  | 6:76274825   | C   | T   | <i>RNU6.1016P</i>   | ENSG00000252498 | cis       | 1.72x10-12   | 15.3           | snRNA     |
| rs7448600   | 5:21365623   | C   | A   | <i>RP11.823P9.3</i> | ENSG00000233974 | cis       | 1.82x10-12   | 15.3           | PPG       |
| rs10435105  | 7:3330994    | C   | T   | <i>SDK1</i>         | ENSG00000146555 | cis       | 1.97x10-12   | 15.2           | TCunPPG   |
| rs112161250 | 15:58440089  | G   | GCA | <i>RP1</i>          | ENSG00000104237 | trans     | 1.94x10-12   | 15.2           | PC        |
| rs9567377   | 13:44720217  | G   | T   | <i>SMIM2.AS1</i>    | ENSG00000227258 | cis       | 2x10-12      | 15.2           | PC        |

*Supplementary Table 3 Phenotypes from the NHGRI-EBI GWAS Catalog of published genome-wide association studies reported for novel and confirmed eQTL.*

The full list of phenotypes reported for eQTL in the PAH Cohort study including sixty-three eQTL reported for at least one lung-related phenotype in the GWAS Catalog are listed in the column 'GWAS Catalog phenotypes'. The column 'confirmation' indicates if the eQTL was found in the population-based studies used for confirmation.

| eQTL rs ID  | Gene symbol         | confirmation | GWAS Catalog phenotypes                                                                                                                                                                                                                                                                                                                                                                                                                                                                                                                                                                                                                                                                                                                                                                                                                                                                            |
|-------------|---------------------|--------------|----------------------------------------------------------------------------------------------------------------------------------------------------------------------------------------------------------------------------------------------------------------------------------------------------------------------------------------------------------------------------------------------------------------------------------------------------------------------------------------------------------------------------------------------------------------------------------------------------------------------------------------------------------------------------------------------------------------------------------------------------------------------------------------------------------------------------------------------------------------------------------------------------|
| rs10790962  | <i>SEPT3</i>        | novel        | Glaucoma; Glaucoma (multi-trait analysis); Intraocular pressure; Lung function (FVC); Psoriasis; Multiple sclerosis; Psoriasis vulgaris; Celiac disease; Lymphocyte percentage of white cells                                                                                                                                                                                                                                                                                                                                                                                                                                                                                                                                                                                                                                                                                                      |
| rs7947900   | <i>IFITM2</i>       | novel        | Eosinophil counts; Red blood cell count; Lung function (FEV1/FVC); White blood cell count; Granulocyte percentage of myeloid white cells; Monocyte percentage of white cells; Monocyte count; Neutrophil percentage of white cells; Lymphocyte percentage of white cells; Myeloid white cell count; White blood cell count (basophil); Sum neutrophil eosinophil counts; Granulocyte count; Neutrophil count; Sum basophil neutrophil counts; Medication use (thyroid preparations)                                                                                                                                                                                                                                                                                                                                                                                                                |
| rs1451659   | <i>OR51R1P</i>      | novel        | Lung cancer                                                                                                                                                                                                                                                                                                                                                                                                                                                                                                                                                                                                                                                                                                                                                                                                                                                                                        |
| rs2008345   | <i>RP11.298I3.1</i> | novel        | Lung function (FEV1/FVC); Household income (MTAG); Cognitive ability; years of educational attainment or schizophrenia (pleiotropy); Cognitive ability (MTAG); Educational attainment (years of education); Educational attainment (MTAG); Highest math class taken; Cognitive performance (MTAG); Self-reported math ability; Highest math class taken (MTAG)                                                                                                                                                                                                                                                                                                                                                                                                                                                                                                                                     |
| rs10136164  | <i>PAX9</i>         | novel        | Lung function (FVC)                                                                                                                                                                                                                                                                                                                                                                                                                                                                                                                                                                                                                                                                                                                                                                                                                                                                                |
| rs72785089  | <i>CLEC18A</i>      | novel        | Lung function (FVC)                                                                                                                                                                                                                                                                                                                                                                                                                                                                                                                                                                                                                                                                                                                                                                                                                                                                                |
| rs8058597   | <i>NPIP815</i>      | novel        | Lung function (FVC)                                                                                                                                                                                                                                                                                                                                                                                                                                                                                                                                                                                                                                                                                                                                                                                                                                                                                |
| rs111164082 | <i>RP11.798G7.3</i> | novel        | Interstitial lung disease; Progressive supranuclear palsy; Risk-taking tendency (4-domain principal component model); Depressed affect; Eosinophil counts; Worry; Neuroticism; Number of sexual partners; Red blood cell count; General cognitive ability; Lung function (FVC); Male-pattern baldness; Alcohol consumption; Ease of getting up in the morning; Daytime nap; White matter microstructure (fractional anisotropy); Parkinson's disease; Alcohol use disorder (total score); Alcohol use disorder (consumption score); Osteoarthritis (hip); Sleep duration; Automobile speeding propensity; Brain region volumes; General factor of neuroticism; Primary biliary cirrhosis; Neuroticism; Irritable mood; Feeling guilty; Feeling miserable; Experiencing mood swings; Worry too long after an embarrassing experience; Feeling hurt; Feeling worry; Type 1 diabetes; Waist-hip ratio |
| rs3785884   | <i>LRR37A2</i>      | novel        | Interstitial lung disease; Progressive supranuclear palsy; Risk-taking tendency (4-domain principal component model); Depressed affect; Eosinophil counts; Worry; Neuroticism; Number of sexual partners; Red blood cell count; General cognitive ability; Lung function (FVC); Household income; Male-pattern baldness; Alcohol consumption; Ease of getting up in the morning; Daytime nap; White matter microstructure (fractional anisotropy); Parkinson's disease; Alcohol use disorder (total score); Alcohol use disorder (consumption score); Osteoarthritis (hip); Sleep duration; Automobile speeding propensity; Brain region volumes; General factor of neuroticism; Neuroticism; Irritable mood; Feeling guilty; Feeling miserable; Experiencing mood swings; Worry                                                                                                                   |

| eQTL rs ID  | Gene symbol          | confirmation | GWAS Catalog phenotypes                                                                                                                                                                                                                                                                                                                                                                                                                                                                                                                                                                                                                           |
|-------------|----------------------|--------------|---------------------------------------------------------------------------------------------------------------------------------------------------------------------------------------------------------------------------------------------------------------------------------------------------------------------------------------------------------------------------------------------------------------------------------------------------------------------------------------------------------------------------------------------------------------------------------------------------------------------------------------------------|
|             |                      |              | too long after an embarrassing experience; Feeling hurt; Feeling worry; Type 1 diabetes; Waist-hip ratio; Medication use (anilides)                                                                                                                                                                                                                                                                                                                                                                                                                                                                                                               |
| rs112534607 | <i>AC126544.4</i>    | novel        | Lung function in never smokers (low FEV1 vs high FEV1); Loneliness; White matter microstructure (radial diusivities); White matter microstructure (axial diusivities); White matter microstructure (mean diusivities); White matter microstructure (fractional anisotropy); General cognitive ability; Neuroticism; Feeling guilty; Feeling miserable; Experiencing mood swings; Red cell distribution width; Mood instability; Breast cancer                                                                                                                                                                                                     |
| rs2732617   | <i>RP11.359G22.2</i> | novel        | Lung function in never smokers (low FEV1 vs high FEV1); Loneliness; White matter microstructure (radial diusivities); White matter microstructure (axial diusivities); White matter microstructure (mean diusivities); White matter microstructure (fractional anisotropy); General cognitive ability; Neuroticism; Feeling guilty; Feeling miserable; Experiencing mood swings; Red cell distribution width; Mood instability; Breast cancer                                                                                                                                                                                                     |
| rs2732603   | <i>RP11.583F2.1</i>  | novel        | Lung function in never smokers (low FEV1 vs high FEV1); Loneliness; White matter microstructure (radial diusivities); White matter microstructure (axial diusivities); White matter microstructure (mean diusivities); White matter microstructure (fractional anisotropy); General cognitive ability; Neuroticism; Feeling guilty; Feeling miserable; Experiencing mood swings; Red cell distribution width; Mood instability; Breast cancer                                                                                                                                                                                                     |
| rs8073963   | <i>HOXB.AS1</i>      | novel        | Lung function (FEV1/FVC); Primary tooth development (number of teeth)                                                                                                                                                                                                                                                                                                                                                                                                                                                                                                                                                                             |
| rs35858034  | <i>CYP2T2P</i>       | novel        | Smoking behavior; Chronic obstructive pulmonary disease; Smoking behaviour (cigarettes smoked per day); Blood protein levels; Post bronchodilator FEV1/FVC ratio; Emphysema imaging phenotypes; Post bronchodilator FEV1; Hemoglobin concentration                                                                                                                                                                                                                                                                                                                                                                                                |
| rs2353408   | <i>U2SURP</i>        | novel        | Red cell distribution width; Lung function (FEV1/FVC); Urate levels                                                                                                                                                                                                                                                                                                                                                                                                                                                                                                                                                                               |
| rs9842198   | <i>PA2G4P4</i>       | novel        | Sunburns; Interleukin-2 levels; Nose size; Breast cancer; Chronic obstructive pulmonary disease or resting heart rate (pleiotropy)                                                                                                                                                                                                                                                                                                                                                                                                                                                                                                                |
| rs10079553  | <i>RUFY1</i>         | novel        | Lung cancer                                                                                                                                                                                                                                                                                                                                                                                                                                                                                                                                                                                                                                       |
| rs6925979   | <i>ADGRG6</i>        | novel        | Height; Scoliosis; Body fat distribution (trunk fat ratio); Body fat distribution (leg fat ratio); Body fat distribution (arm fat ratio); Heel bone mineral density; Chronic obstructive pulmonary disease; Adolescent idiopathic scoliosis; Waist circumference adjusted for body mass index; Waist circumference adjusted for BMI in non-smokers; Waist circumference adjusted for BMI in smokers; Waist circumference adjusted for BMI (adjusted for smoking behaviour); Waist circumference adjusted for BMI (joint analysis main effects and smoking interaction); Chronic obstructive pulmonary disease or high blood pressure (pleiotropy) |
| rs2769345   | <i>RP11.514O12.4</i> | novel        | Crohn's disease; Vitiligo; Autoimmune traits; Hypothyroidism; Graves' disease; Inflammatory bowel disease; Lung cancer; Lung adenocarcinoma; Basal cell carcinoma; Medication use (thyroid preparations)                                                                                                                                                                                                                                                                                                                                                                                                                                          |
| rs9272779   | <i>HLA.DQA1</i>      | novel        | Schizophrenia; Lung function in never smokers (low FEV1 vs high FEV1); Self-reported allergy; Composite immunoglobulin trait (IgA x IgG x IgM); Type 2 diabetes; Childhood steroid-sensitive nephrotic syndrome; Asthma and hay fever; Allergic sensitization; Epstein Barr virus nuclear antigen 1 IgG levels; Epstein Barr virus nuclear antigen 1 IgG seropositivity; Epstein-Barr virus immune response (multivariate analysis); Autism spectrum disorder or schizophrenia; Asthma or allergic disease (pleiotropy); Asthma; Hypothyroidism; Ulcerative colitis                                                                               |
| rs9273495   | <i>HLA.DQB2</i>      | novel        | Asthma; Ulcerative colitis; Chronic lymphocytic leukemia; Type 1 diabetes; Type 2 diabetes; Eosinophilic granulomatosis with polyangiitis; Asthma and hay fever; Epstein Barr virus nuclear antigen 1 IgG levels; Asthma or allergic disease (pleiotropy); Blood protein levels; Lung function (FEV1); Lung function (FEV1/FVC); Inflammatory                                                                                                                                                                                                                                                                                                     |

| eQTL rs ID | Gene symbol              | confirmation | GWAS Catalog phenotypes                                                                                                                                                                                                                                                                                                                                                                                                                                                                                                                                                                                                                                                                                                                                                                                                                                                                                                                                                                                                                                            |
|------------|--------------------------|--------------|--------------------------------------------------------------------------------------------------------------------------------------------------------------------------------------------------------------------------------------------------------------------------------------------------------------------------------------------------------------------------------------------------------------------------------------------------------------------------------------------------------------------------------------------------------------------------------------------------------------------------------------------------------------------------------------------------------------------------------------------------------------------------------------------------------------------------------------------------------------------------------------------------------------------------------------------------------------------------------------------------------------------------------------------------------------------|
|            |                          |              | bowel disease; Medication use (drugs used in diabetes)                                                                                                                                                                                                                                                                                                                                                                                                                                                                                                                                                                                                                                                                                                                                                                                                                                                                                                                                                                                                             |
| rs9273841  | <i>XXbac.BPG254F23.5</i> | novel        | Immunoglobulin A; Multiple sclerosis; Ulcerative colitis or Crohn's disease; Systemic lupus erythematosus; Lymphoma; Ulcerative colitis; Multiple sclerosis (OCB status); Appendicular lean mass; FEV1; Lung function (FEV1/FVC); Peak expiratory flow; Follicular lymphoma; Hypothyroidism; Blood protein levels; Hepatitis C (spontaneous viral clearance); Random C-peptide levels in type I diabetes; C-peptide levels in type I diabetes; Hepatocellular carcinoma in hepatitis C infection; Urinary tract infection frequency; Hepatitis B; Itch intensity from mosquito bite adjusted by bite size; Mosquito bite size; Perceived unattractiveness to mosquitoes; Itch intensity from mosquito bite; Crohn's disease; IgA nephropathy; Lupus nephritis in systemic lupus erythematosus; C-reactive protein levels or total cholesterol levels (pleiotropy); Oral cavity and pharyngeal cancer; Oropharynx cancer; Oral cavity cancer                                                                                                                        |
| rs13238996 | <i>GTF2IRD2B</i>         | novel        | Red cell distribution width; Cardiovascular disease; Lung function (FEV1/FVC); Body mass index; Menarche (age at onset); Chronic obstructive pulmonary disease or high blood pressure (pleiotropy); Diastolic blood pressure                                                                                                                                                                                                                                                                                                                                                                                                                                                                                                                                                                                                                                                                                                                                                                                                                                       |
| rs7543453  | <i>RP11.305E17.6</i>     | confirmed    | Lung cancer in ever smokers                                                                                                                                                                                                                                                                                                                                                                                                                                                                                                                                                                                                                                                                                                                                                                                                                                                                                                                                                                                                                                        |
| rs760077   | <i>THBS3</i>             | confirmed    | Renal function-related traits (BUN); Magnesium levels; Esophageal cancer and gastric cancer; Urate levels; Occipital lobe volume; General risk tolerance (MTAG); Red blood cell count; Serum urea levels; Lung function (FVC); Serum cancer antigen 15.3 levels; PR interval; Diastolic blood pressure; Mean arterial pressure; Systolic blood pressure; Dentures; Brain region volumes; Heel bone mineral density; Number of decayed; missing and filled tooth surfaces or use of dentures; Gastric cancer; Serum uric acid levels; Blood urea nitrogen levels; Estimated glomerular filtration rate; Non-cardia gastric cancer; Urinary albumin-to-creatinine ratio in non-diabetics; Urinary albumin-to-creatinine ratio; Gastric adenocarcinoma (histologically verified); Cancer (pleiotropy); Cancer; Hematocrit; Chronic inflammatory diseases (ankylosing spondylitis; Crohn's disease; psoriasis; primary sclerosing cholangitis; ulcerative colitis) (pleiotropy); Hemoglobin concentration; Urea levels; Serum magnesium levels; Gout; Microalbuminuria |
| rs6480781  | <i>C10orf11</i>          | confirmed    | Lung function (FEV1/FVC)                                                                                                                                                                                                                                                                                                                                                                                                                                                                                                                                                                                                                                                                                                                                                                                                                                                                                                                                                                                                                                           |
| rs2342607  | <i>TMEM254.AS1</i>       | confirmed    | Chronic obstructive pulmonary disease-related biomarkers                                                                                                                                                                                                                                                                                                                                                                                                                                                                                                                                                                                                                                                                                                                                                                                                                                                                                                                                                                                                           |
| rs2368238  | <i>MPZL2</i>             | confirmed    | Blood protein levels; Lung adenocarcinoma; Non-small cell lung cancer; Lung cancer                                                                                                                                                                                                                                                                                                                                                                                                                                                                                                                                                                                                                                                                                                                                                                                                                                                                                                                                                                                 |
| rs11231152 | <i>RP11.371A22.1</i>     | confirmed    | Waist-hip ratio; Heel bone mineral density; Waist-to-hip ratio adjusted for BMI; Lung function (FVC); FEV1; Peak expiratory flow; Blood protein levels; Waist-to-hip ratio adjusted for body mass index; Lung function (FEV1); Waist-to-hip ratio adjusted for BMI (joint analysis for main effect and physical activity interaction); Waist-to-hip ratio adjusted for BMI in active individuals; Waist-to-hip ratio adjusted for BMI x sex x age interaction (4df test)                                                                                                                                                                                                                                                                                                                                                                                                                                                                                                                                                                                           |
| rs61705659 | <i>ARHGEF17</i>          | confirmed    | Pulmonary function (smoking interaction); FEV1; Lung function (FEV1/FVC); Peak expiratory flow; GIP levels in response to oral glucose tolerance test (120 minutes)                                                                                                                                                                                                                                                                                                                                                                                                                                                                                                                                                                                                                                                                                                                                                                                                                                                                                                |
| rs10876864 | <i>RPS26</i>             | confirmed    | Type 1 diabetes; Vitiligo; Polycystic ovary syndrome; Appendicular lean mass; Smoking status (ever vs never smokers); Eosinophil counts; Red blood cell count; Respiratory diseases; Autoimmune traits; General cognitive ability; Lung function (FEV1/FVC); FEV1; Asthma; Eczema; Hypothyroidism; Menarche (age at onset); Hay fever and/or eczema; Household income (MTAG); Nasal polyps; Cognitive ability; years of educational attainment or schizophrenia (pleiotropy); Smoking status; Inflammatory skin disease; Alopecia areata; Lung function (FEV1);                                                                                                                                                                                                                                                                                                                                                                                                                                                                                                    |

| eQTL rs ID | Gene symbol         | confirmation | GWAS Catalog phenotypes                                                                                                                                                                                                                                                                                                                                                                                                                                                                                                                                                                                                                                                                                                                                                                                                                                                                                                                                                                                                                                                                                                                                                                                                                                                                                                                                                                                                                                                                                                                                                                                                                                                                                                               |
|------------|---------------------|--------------|---------------------------------------------------------------------------------------------------------------------------------------------------------------------------------------------------------------------------------------------------------------------------------------------------------------------------------------------------------------------------------------------------------------------------------------------------------------------------------------------------------------------------------------------------------------------------------------------------------------------------------------------------------------------------------------------------------------------------------------------------------------------------------------------------------------------------------------------------------------------------------------------------------------------------------------------------------------------------------------------------------------------------------------------------------------------------------------------------------------------------------------------------------------------------------------------------------------------------------------------------------------------------------------------------------------------------------------------------------------------------------------------------------------------------------------------------------------------------------------------------------------------------------------------------------------------------------------------------------------------------------------------------------------------------------------------------------------------------------------|
|            |                     |              | Body mass index; Rheumatoid arthritis; Heel bone mineral density; Age of smoking initiation (MTAG); Asthma (childhood onset); Intelligence (MTAG); Cognitive ability (MTAG); Educational attainment (years of education); Smoking initiation (ever regular vs never regular); Gastroesophageal reflux disease; Asthma or allergic disease (pleiotropy); Pediatric autoimmune diseases; Nonsyndromic cleft lip with cleft palate; Eosinophil percentage of white cells; Educational attainment (college completion); Eosinophil percentage of granulocytes; Sum eosinophil basophil counts; Neutrophil percentage of granulocytes; Allergic disease (asthma; hay fever or eczema); Asthma (adult onset); Medication use (drugs for peptic ulcer and gastro-oesophageal reflux disease); Medication use (glucocorticoids); Medication use (adrenergics; inhalants); Medication use (thyroid preparations); Asthma (moderate or severe); Educational attainment (MTAG); Self-reported math ability (MTAG); Highest math class taken; Cognitive performance; Cognitive performance (MTAG)                                                                                                                                                                                                                                                                                                                                                                                                                                                                                                                                                                                                                                                 |
| rs1131017  | <i>AC004057.1</i>   | confirmed    | Type 1 diabetes; Vitiligo; Polycystic ovary syndrome; Appendicular lean mass; Smoking status (ever vs never smokers); Red blood cell count; Respiratory diseases; General cognitive ability; Lung function (FEV1/FVC); FEV1; Asthma; Eczema; Hypothyroidism; Menarche (age at onset); Hay fever and/or eczema; Allergic rhinitis; Household income (MTAG); Nasal polyps; Cognitive ability; years of educational attainment or schizophrenia (pleiotropy); Smoking status; Inflammatory skin disease; Alopecia areata; Lung function (FEV1); Body mass index; Rheumatoid arthritis; Heel bone mineral density; Brain region volumes; Lifetime smoking index; Age of smoking initiation (MTAG); Smoking initiation (ever regular vs never regular); Asthma (childhood onset); Cognitive function; Intelligence (MTAG); Cognitive ability (MTAG); Anorexia nervosa; Educational attainment (years of education); Smoking initiation; Allergic disease (asthma; hay fever or eczema); Asthma or allergic disease (pleiotropy); Pediatric autoimmune diseases; Eosinophil counts; Nonsyndromic cleft lip with cleft palate; Eosinophil percentage of white cells; Educational attainment (college completion); Eosinophil percentage of granulocytes; Neutrophil percentage of granulocytes; Asthma (adult onset); Smoking initiation (ever regular vs never regular) (MTAG); Medication use (glucocorticoids); Medication use (adrenergics; inhalants); Medication use (thyroid preparations); Asthma (moderate or severe); Educational attainment (MTAG); Self-reported math ability (MTAG); Highest math class taken; Cognitive performance; Cognitive performance (MTAG); Self-reported math ability; Highest math class taken (MTAG) |
| rs7147394  | <i>HAUS4</i>        | confirmed    | Hypertension; Lung function (FEV1/FVC); Household income (MTAG); Cognitive ability; years of educational attainment or schizophrenia (pleiotropy); Cognitive ability (MTAG); Educational attainment (years of education); Educational attainment (MTAG); Highest math class taken; Cognitive performance (MTAG); Self-reported math ability; Highest math class taken (MTAG)                                                                                                                                                                                                                                                                                                                                                                                                                                                                                                                                                                                                                                                                                                                                                                                                                                                                                                                                                                                                                                                                                                                                                                                                                                                                                                                                                          |
| rs7183203  | <i>FBN1</i>         | confirmed    | Breast cancer; Lung function (FEV1/FVC); Heel bone mineral density; Intraocular pressure                                                                                                                                                                                                                                                                                                                                                                                                                                                                                                                                                                                                                                                                                                                                                                                                                                                                                                                                                                                                                                                                                                                                                                                                                                                                                                                                                                                                                                                                                                                                                                                                                                              |
| rs1628955  | <i>ANKDD1A</i>      | confirmed    | Lung function (FEV1/FVC); Pulse pressure                                                                                                                                                                                                                                                                                                                                                                                                                                                                                                                                                                                                                                                                                                                                                                                                                                                                                                                                                                                                                                                                                                                                                                                                                                                                                                                                                                                                                                                                                                                                                                                                                                                                                              |
| rs34443712 | <i>TSPAN3</i>       | confirmed    | Height; Red blood cell count; Lung function (FEV1/FVC)                                                                                                                                                                                                                                                                                                                                                                                                                                                                                                                                                                                                                                                                                                                                                                                                                                                                                                                                                                                                                                                                                                                                                                                                                                                                                                                                                                                                                                                                                                                                                                                                                                                                                |
| rs2668714  | <i>RP11.156P1.2</i> | confirmed    | Lung function in never smokers (low FEV1 vs high FEV1); Loneliness; White matter microstructure (radial diffusivities); White matter microstructure (axial diffusivities); White matter microstructure (mean diffusivities); White matter microstructure (fractional anisotropy); General cognitive ability; Neuroticism; Feeling guilty; Feeling miserable; Experiencing mood swings; Red cell distribution width; Mood instability; Breast cancer                                                                                                                                                                                                                                                                                                                                                                                                                                                                                                                                                                                                                                                                                                                                                                                                                                                                                                                                                                                                                                                                                                                                                                                                                                                                                   |
| rs2696506  | <i>RP11.44K6.4</i>  | confirmed    | Lung function in never smokers (low FEV1 vs high FEV1); Loneliness; White matter microstructure (radial                                                                                                                                                                                                                                                                                                                                                                                                                                                                                                                                                                                                                                                                                                                                                                                                                                                                                                                                                                                                                                                                                                                                                                                                                                                                                                                                                                                                                                                                                                                                                                                                                               |

| eQTL rs ID  | Gene symbol          | confirmation | GWAS Catalog phenotypes                                                                                                                                                                                                                                                                                                                                                                                                                                                                                                                                                                                                                                                                                                                            |
|-------------|----------------------|--------------|----------------------------------------------------------------------------------------------------------------------------------------------------------------------------------------------------------------------------------------------------------------------------------------------------------------------------------------------------------------------------------------------------------------------------------------------------------------------------------------------------------------------------------------------------------------------------------------------------------------------------------------------------------------------------------------------------------------------------------------------------|
|             |                      |              | diusivities); White matter microstructure (axial diusivities); White matter microstructure (mean diusivities); White matter microstructure (fractional anisotropy); General cognitive ability; Neuroticism; Feeling guilty; Feeling miserable; Experiencing mood swings; Red cell distribution width; Mood instability; Breast cancer                                                                                                                                                                                                                                                                                                                                                                                                              |
| rs113680823 | <i>DCXR</i>          | confirmed    | Lung function (FVC); FEV1                                                                                                                                                                                                                                                                                                                                                                                                                                                                                                                                                                                                                                                                                                                          |
| rs62113084  | <i>ZFP82</i>         | confirmed    | Lung function (FVC)                                                                                                                                                                                                                                                                                                                                                                                                                                                                                                                                                                                                                                                                                                                                |
| rs406133    | <i>SHKBP1</i>        | confirmed    | Age at loss of ambulation in Duchenne muscular dystrophy; Lung function (FVC); Smoking initiation (ever regular vs never regular) (MTAG)                                                                                                                                                                                                                                                                                                                                                                                                                                                                                                                                                                                                           |
| rs4569473   | <i>RP11.301O19.1</i> | confirmed    | Lung function (FEV1/FVC); Pulse pressure; Diastolic blood pressure; Systolic blood pressure                                                                                                                                                                                                                                                                                                                                                                                                                                                                                                                                                                                                                                                        |
| rs2735313   | <i>LCA5L</i>         | confirmed    | Lung function (FEV1/FVC); Platelet count                                                                                                                                                                                                                                                                                                                                                                                                                                                                                                                                                                                                                                                                                                           |
| rs13051949  | <i>WRB</i>           | confirmed    | Lung function (FEV1/FVC); Esotropia; Non-accommodative esotropia; Platelet count; Plateletcrit                                                                                                                                                                                                                                                                                                                                                                                                                                                                                                                                                                                                                                                     |
| rs1800818   | <i>PDGFB</i>         | confirmed    | Lung function (FEV1/FVC)                                                                                                                                                                                                                                                                                                                                                                                                                                                                                                                                                                                                                                                                                                                           |
| rs6775611   | <i>ANAPC13</i>       | confirmed    | Lung function (FVC); Height; Neurocognitive impairment in HIV-1 infection (dichotomous)                                                                                                                                                                                                                                                                                                                                                                                                                                                                                                                                                                                                                                                            |
| rs9852745   | <i>RSRC1</i>         | confirmed    | Lung function in heavy smokers (high FEV1 vs average FEV1); Waist-hip ratio; Depression; Body mass index                                                                                                                                                                                                                                                                                                                                                                                                                                                                                                                                                                                                                                           |
| rs11724788  | <i>CYTL1</i>         | confirmed    | Lung function (FVC); Height                                                                                                                                                                                                                                                                                                                                                                                                                                                                                                                                                                                                                                                                                                                        |
| rs10064943  | <i>RP11.43F13.1</i>  | confirmed    | Lung adenocarcinoma                                                                                                                                                                                                                                                                                                                                                                                                                                                                                                                                                                                                                                                                                                                                |
| rs12658646  | <i>PDE8B</i>         | confirmed    | Caudate nucleus volume; Lung function (FEV1/FVC); Estimated glomerular filtration rate                                                                                                                                                                                                                                                                                                                                                                                                                                                                                                                                                                                                                                                             |
| rs4869923   | <i>GINM1</i>         | confirmed    | Brainstem volume; Lung cancer                                                                                                                                                                                                                                                                                                                                                                                                                                                                                                                                                                                                                                                                                                                      |
| rs2393593   | <i>HIST1H4H</i>      | confirmed    | Parental longevity (father's age at death or father's attained age); Offspring birth weight; Birth weight; Hand grip strength; Lifetime smoking index; Chronotype; Smoking cessation (MTAG); Lung cancer; Height; Cisplatin-induced ototoxicity; Educational attainment; Educational attainment (years of education); Educational attainment (MTAG)                                                                                                                                                                                                                                                                                                                                                                                                |
| rs67509210  | <i>BTN3A2</i>        | confirmed    | Urinary metabolite modules (eigenmetabolites) in chronic kidney disease; General cognitive ability; Life satisfaction; Neuroticism; Hip circumference variance; Hip circumference; Intelligence (MTAG); Urinary tract infection frequency; Squamous cell lung carcinoma; Lung cancer in ever smokers; Headache; Urate levels                                                                                                                                                                                                                                                                                                                                                                                                                       |
| rs67859638  | <i>BTN3A2</i>        | confirmed    | Urinary tract infection frequency; Squamous cell lung carcinoma                                                                                                                                                                                                                                                                                                                                                                                                                                                                                                                                                                                                                                                                                    |
| rs192804591 | <i>HIST1H4L</i>      | confirmed    | Schizophrenia; White matter microstructure (radial diusivities); White matter microstructure (mean diusivities); Schizophrenia; schizoaffective disorder or bipolar disorder; Pulse pressure; Schizophrenia or bipolar disorder; Lung cancer; Urate levels                                                                                                                                                                                                                                                                                                                                                                                                                                                                                         |
| rs1811359   | <i>HLA.DPB2</i>      | confirmed    | Hepatitis B; Aspirin exacerbated respiratory disease in asthmatics; Hepatitis B (viral clearance); Severe aplastic anemia; Chronic hepatitis B infection; Hepatitis B vaccine response; Wegener's granulomatosis; Antineutrophil cytoplasmic antibody-associated vasculitis; Mouth ulcers; Response to hepatitis B vaccine; Knee osteoarthritis; Osteoarthritis of the hip or knee; Osteoarthritis; White coat effect (clinic diastolic blood pressure minus ambulatory diastolic blood pressure); Thyroid peroxidase antibody levels; Acute graft versus host disease in bone marrow transplantation (recipient effect); Susceptibility to persistent hepatitis B virus infection; EGFR mutation-positive lung adenocarcinoma; Sjögren's syndrome |

| eQTL rs ID | Gene symbol        | confirmation | GWAS Catalog phenotypes                                                                                                                                                                                                                                                                                                                                                                                                                                                                                                                                                                                                                                                                                                                                                                                                                             |
|------------|--------------------|--------------|-----------------------------------------------------------------------------------------------------------------------------------------------------------------------------------------------------------------------------------------------------------------------------------------------------------------------------------------------------------------------------------------------------------------------------------------------------------------------------------------------------------------------------------------------------------------------------------------------------------------------------------------------------------------------------------------------------------------------------------------------------------------------------------------------------------------------------------------------------|
| rs7797295  | <i>GNA12</i>       | confirmed    | Height; Ulcerative colitis; Birth weight; Body fat distribution (trunk fat ratio); Body fat distribution (leg fat ratio); Heel bone mineral density; White blood cell count; Chronic obstructive pulmonary disease; Lung function (FEV1/FVC); White matter microstructure (mode of anisotropy); Brain region volumes; Hip circumference; Hip circumference adjusted for BMI; Waist circumference adjusted for body mass index; Waist circumference adjusted for BMI in non-smokers; Waist circumference adjusted for BMI (joint analysis main effects and physical activity interaction); Inflammatory bowel disease; Waist circumference adjusted for BMI in active individuals; Waist circumference adjusted for BMI (adjusted for smoking behaviour); Waist circumference adjusted for BMI (joint analysis main effects and smoking interaction) |
| rs80233585 | <i>PPP1R16A</i>    | confirmed    | General cognitive ability; Reaction time; Lung function (FVC); Cognitive ability; years of educational attainment or schizophrenia (pleiotropy); Height; Blood metabolite levels; Age at first birth; Mean corpuscular hemoglobin concentration; Educational attainment (years of education); Smoking initiation (ever regular vs never regular) (MTAG); Self-reported math ability (MTAG); Self-reported math ability; Highest math class taken; Educational attainment (MTAG); Cognitive performance (MTAG); Highest math class taken (MTAG)                                                                                                                                                                                                                                                                                                      |
| rs1545837  | <i>KIAA1967</i>    | confirmed    | Parkinson's disease or first degree relation to individual with Parkinson's disease; Lung function (FVC); Triglycerides; Parkinson's disease; Exploratory eye movement dysfunction in schizophrenia (responsive search score); Exploratory eye movement dysfunction in schizophrenia (cognitive search score)                                                                                                                                                                                                                                                                                                                                                                                                                                                                                                                                       |
| rs11778927 | <i>RP11.51J9.5</i> | confirmed    | Lung function (FEV1/FVC); Migraine                                                                                                                                                                                                                                                                                                                                                                                                                                                                                                                                                                                                                                                                                                                                                                                                                  |
| rs3213849  | <i>FGFR1</i>       | confirmed    | Lung function (FEV1/FVC); PR interval; Body mass index; Age of smoking initiation (MTAG); Smoking initiation (ever regular vs never regular) (MTAG); Response to cognitive-behavioural therapy in anxiety disorder; Waist-to-hip ratio adjusted for BMI; Waist-hip ratio                                                                                                                                                                                                                                                                                                                                                                                                                                                                                                                                                                            |
| rs10870201 | <i>CARD9</i>       | confirmed    | Crohn's disease; Ulcerative colitis; Red cell distribution width; Lung function (FVC); FEV1; Type 2 diabetes; Glucose homeostasis traits; Ankylosing spondylitis; Inflammatory bowel disease; Peak insulin response (insulin secretion adjusted); Pediatric autoimmune diseases; IgA nephropathy; Granulocyte percentage of myeloid white cells; Chronic inflammatory diseases (ankylosing spondylitis; Crohn's disease; psoriasis; primary sclerosing cholangitis; ulcerative colitis) (pleiotropy)                                                                                                                                                                                                                                                                                                                                                |
| rs10870160 | <i>SDCCAG3</i>     | confirmed    | Crohn's disease; Ulcerative colitis; Red cell distribution width; White blood cell count; Lung function (FVC); Morningness; Morning person; Glucose homeostasis traits; Ankylosing spondylitis; Inflammatory bowel disease; Chronotype; Basal cell carcinoma; Squamous cell carcinoma; Cutaneous squamous cell carcinoma; Pediatric autoimmune diseases; IgA nephropathy; Eosinophil counts; Chronic inflammatory diseases (ankylosing spondylitis; Crohn's disease; psoriasis; primary sclerosing cholangitis; ulcerative colitis) (pleiotropy); Myeloid white cell count; Sum neutrophil eosinophil counts; Granulocyte count; Sum basophil neutrophil counts; Neutrophil count                                                                                                                                                                   |

Supplementary Table 4 Significant KEGG pathways from the enrichment analysis of genes with novel eQTL in the PAH Cohort.

Column names: eQTL chr:pos (REF/ALT) = eQTL chromosome: base pair position (reference/alternative) alleles in the Ensembl human genome reference

GRCh37; eQTL rs ID = dbSNP (150) variant identifier; eQTL type = variant annotation from ANNOVAR.

| Gene symbol                | Gene name                                                                         | eQTL chr:pos (REF/ALT) | eQTL rs ID | cis/trans | eQTL type      | eQTL P-value           |
|----------------------------|-----------------------------------------------------------------------------------|------------------------|------------|-----------|----------------|------------------------|
| Taste transduction         |                                                                                   |                        |            |           |                |                        |
| TAS2R13                    | taste 2 receptor member 13                                                        | 12:11331094 (T/C)      | rs7350611  | cis       | intergenic     | 5.99x10 <sup>-20</sup> |
| TAS2R19                    | taste 2 receptor member 19                                                        | 12:11138683 (C/T)      | rs10772397 | cis       | exonic         | 1.43x10 <sup>-16</sup> |
| TAS2R30                    | taste 2 receptor member 30                                                        | 12:11140444 (T/C)      | rs6488334  | cis       | ncRNA intronic | 9.02x10 <sup>-13</sup> |
| TAS2R31                    | taste 2 receptor member 31                                                        | 12:10944783 (A/G)      | rs2588347  | cis       | ncRNA intronic | 4.88x10 <sup>-19</sup> |
| TAS2R41                    | taste 2 receptor member 41                                                        | 7:143081942 (G/C)      | rs11772895 | cis       | ncRNA intronic | 3.57x10 <sup>-37</sup> |
| TAS2R43                    | taste 2 receptor member 43                                                        | 12:11226237 (A/G)      | rs67933574 | cis       | ncRNA intronic | 8.58x10 <sup>-65</sup> |
| TAS2R46                    | taste 2 receptor member 46                                                        | 12:11140444 (T/C)      | rs6488334  | cis       | ncRNA intronic | 5.15x10 <sup>-22</sup> |
| TAS2R50                    | taste 2 receptor member 50                                                        | 12:11138683 (C/T)      | rs10772397 | cis       | exonic         | 2.98x10 <sup>-28</sup> |
| Graft-versus-host disease  |                                                                                   |                        |            |           |                |                        |
| HLA-B                      | major histocompatibility complex, class I, B                                      | 6:31322782 (C/G)       | rs2596496  | cis       | intronic       | 6.12x10 <sup>-23</sup> |
| HLA-C                      | major histocompatibility complex, class I, C                                      | 6:31239681 (A/T)       | rs9264669  | cis       | intronic       | 4.11x10 <sup>-39</sup> |
| HLA-DQA1                   | major histocompatibility complex, class II, DQ alpha 1                            | 6:32610314 (T/C)       | rs9272779  | cis       | intronic       | 2.64x10 <sup>-19</sup> |
| HLA-DRB5                   | major histocompatibility complex, class II, DR beta 5                             | 6:32501347 (G/A)       | rs67851010 | cis       | intergenic     | 4.55x10 <sup>-42</sup> |
| HLA-G                      | major histocompatibility complex, class I, G                                      | 6:31242089 (A/T)       | rs2524080  | trans     | intergenic     | 8.51x10 <sup>-16</sup> |
| HLA-G                      | major histocompatibility complex, class I, G                                      | 6:29936065 (C/T)       | rs17180100 | cis       | intergenic     | 1.59x10 <sup>-28</sup> |
| KIR3DL1                    | killer cell immunoglobulin like receptor, three Ig domains and cytoplasmic tail 1 | 19:55338833 (G/A)      | rs3117640  | cis       | intronic       | 4.03x10 <sup>-22</sup> |
| Autoimmune thyroid disease |                                                                                   |                        |            |           |                |                        |
| HLA-B                      | major histocompatibility complex, class I, B                                      | 6:31322782 (C/G)       | rs2596496  | cis       | intronic       | 6.12x10 <sup>-23</sup> |
| HLA-C                      | major histocompatibility complex, class I, C                                      | 6:31239681 (A/T)       | rs9264669  | cis       | intronic       | 4.11x10 <sup>-39</sup> |
| HLA-DQA1                   | major histocompatibility complex, class II, DQ alpha 1                            | 6:32610314 (T/C)       | rs9272779  | cis       | intronic       | 2.64x10 <sup>-19</sup> |
| HLA-DRB5                   | major histocompatibility complex, class II, DR beta 5                             | 6:32501347 (G/A)       | rs67851010 | cis       | intergenic     | 4.55x10 <sup>-42</sup> |
| HLA-G                      | major histocompatibility complex, class I, G                                      | 6:31242089 (A/T)       | rs2524080  | trans     | intergenic     | 8.51x10 <sup>-16</sup> |
| HLA-G                      | major histocompatibility complex, class I, G                                      | 6:29936065 (C/T)       | rs17180100 | cis       | intergenic     | 1.59x10 <sup>-28</sup> |
| TG                         | thyroglobulin                                                                     | 8:133791175 (C/G)      | rs988067   | cis       | intronic       | 5.79x10 <sup>-25</sup> |
| Allograft rejection        |                                                                                   |                        |            |           |                |                        |
| HLA-B                      | major histocompatibility complex, class I, B                                      | 6:31322782 (C/G)       | rs2596496  | cis       | intronic       | 6.12x10 <sup>-23</sup> |
| HLA-C                      | major histocompatibility complex, class I, C                                      | 6:31239681 (A/T)       | rs9264669  | cis       | intronic       | 4.11x10 <sup>-39</sup> |
| HLA-DQA1                   | major histocompatibility complex, class II, DQ alpha 1                            | 6:32610314 (T/C)       | rs9272779  | cis       | intronic       | 2.64x10 <sup>-19</sup> |
| HLA-DRB5                   | major histocompatibility complex, class II, DR beta 5                             | 6:32501347 (G/A)       | rs67851010 | cis       | intergenic     | 4.55x10 <sup>-42</sup> |
| HLA-G                      | major histocompatibility complex, class I, G                                      | 6:31242089 (A/T)       | rs2524080  | trans     | intergenic     | 8.51x10 <sup>-16</sup> |
| HLA-G                      | major histocompatibility complex, class I, G                                      | 6:29936065 (C/T)       | rs17180100 | cis       | intergenic     | 1.59x10 <sup>-28</sup> |
| Type I diabetes            |                                                                                   |                        |            |           |                |                        |
| HLA-B                      | major histocompatibility complex, class I, B                                      | 6:31322782 (C/G)       | rs2596496  | cis       | intronic       | 6.12x10 <sup>-23</sup> |
| HLA-C                      | major histocompatibility complex, class I, C                                      | 6:31239681 (A/T)       | rs9264669  | cis       | intronic       | 4.11x10 <sup>-39</sup> |
| HLA-DQA1                   | major histocompatibility complex, class II, DQ alpha 1                            | 6:32610314 (T/C)       | rs9272779  | cis       | intronic       | 2.64x10 <sup>-19</sup> |
| HLA-DRB5                   | major histocompatibility complex, class II, DR beta 5                             | 6:32501347 (G/A)       | rs67851010 | cis       | intergenic     | 4.55x10 <sup>-42</sup> |

|              |                                              |                  |            |       |            |                        |
|--------------|----------------------------------------------|------------------|------------|-------|------------|------------------------|
| <i>HLA-G</i> | major histocompatibility complex, class I, G | 6:31242089 (A/T) | rs2524080  | trans | intergenic | $8.51 \times 10^{-16}$ |
| <i>HLA-G</i> | major histocompatibility complex, class I, G | 6:29936065 (C/T) | rs17180100 | cis   | intergenic | $1.59 \times 10^{-28}$ |

## NIHR BioResource Collaborators

NIHR BioResource – Rare Disease Consortium<sup>1</sup>, Julian Adlard<sup>2</sup>, Munaza Ahmed<sup>3</sup>, Tim Aitman<sup>4,5</sup>, Hana Alachkar<sup>6</sup>, David Allsup<sup>7</sup>, Jeff Almeida-King<sup>8</sup>, Philip Ancliff<sup>9</sup>, Richard Antrobus<sup>10</sup>, Ruth Armstrong<sup>11,12,13</sup>, Gavin Arno<sup>14,15</sup>, Sofie Ashford<sup>1,16</sup>, William Astle<sup>1,16,17</sup>, Anthony Attwood<sup>1,16</sup>, Chris Babbs<sup>18,19</sup>, Tamam Bakchoul<sup>20</sup>, Tadbir Bariana<sup>21,22</sup>, Julian Barwell<sup>23,24</sup>, David Bennett<sup>25</sup>, David Bentley<sup>26</sup>, Agnieszka Bierzynska<sup>27</sup>, Tina Biss<sup>28</sup>, Marta Bleda<sup>29</sup>, Harm Bogaard<sup>30</sup>, Christian Bourne<sup>26</sup>, Sara Boyce<sup>31</sup>, John Bradley<sup>1</sup>, Gerome Breen<sup>32,33</sup>, Paul Brennan<sup>34,35</sup>, Carole Brewer<sup>36</sup>, Matthew Brown<sup>1,16</sup>, Michael Browning<sup>37</sup>, Rachel Buchan<sup>38,39</sup>, Matthew Buckland<sup>40</sup>, Teofila Bueser<sup>41,42,43</sup>, Siobhan Burns<sup>40</sup>, Oliver Burren<sup>29</sup>, Paul Calleja<sup>44</sup>, Gerald Carr-White<sup>42</sup>, Keren Carss<sup>1,16</sup>, Ruth Casey<sup>11,12,13</sup>, Mark Caulfield<sup>45</sup>, John Chambers<sup>46,47</sup>, Jennifer Chambers<sup>48,49</sup>, Floria Cheng<sup>49</sup>, Patrick F Chinnery<sup>1,50,51</sup>, Martin Christian<sup>52</sup>, Colin Church<sup>53</sup>, Naomi Clements Brod<sup>1,16</sup>, Gerry Coghlan<sup>40</sup>, Elizabeth Colby<sup>27</sup>, Trevor Cole<sup>54</sup>, Janine Collins<sup>55</sup>, Peter Collins<sup>56</sup>, Camilla Colombo<sup>26</sup>, Robin Condliffe<sup>57</sup>, Stuart Cook<sup>38,58,59,60</sup>, Terry Cook<sup>61</sup>, Nichola Cooper<sup>62</sup>, Paul Corris<sup>63,64</sup>, Abigail Crisp-Hihn<sup>1,16</sup>, Nicola Curry<sup>65</sup>, Cesare Danesino<sup>66</sup>, Matthew Daniels<sup>67,68</sup>, Louise Daugherty<sup>1,16</sup>, John Davis<sup>1,16</sup>, Sri V V Deevi<sup>1,16</sup>, Timothy Dent<sup>68</sup>, Eleanor Dewhurst<sup>1,16</sup>, Peter Dixon<sup>48</sup>, Kate Downes<sup>1,16</sup>, Anna Drazyk<sup>69</sup>, Elizabeth Drewe<sup>70</sup>, Tina Dutt<sup>71</sup>, David Edgar<sup>72</sup>, Karen Edwards<sup>1,16</sup>, William Egner<sup>73</sup>, Wendy Erber<sup>74</sup>, Marie Erwood<sup>1,16</sup>, Maria C Estiu<sup>75</sup>, Gillian Evans<sup>76</sup>, Dafydd Gareth Evans<sup>77</sup>, Tamara Everington<sup>78</sup>, Mélanie Eyries<sup>79</sup>, Remi Favier<sup>80,81,82</sup>, Debra Fletcher<sup>1,16</sup>, James Fox<sup>1,16</sup>, Amy Frary<sup>1,16</sup>, Courtney French<sup>83</sup>, Kathleen Freson<sup>84</sup>, Mattia Frontini<sup>1,16</sup>, Daniel Gale<sup>85</sup>, Henning Gall<sup>86</sup>, Claire Geoghegan<sup>26</sup>, Terry Gerighty<sup>26</sup>, Stefano Ghio<sup>87</sup>, Hossein-Ardeschir Ghofrani<sup>62,86</sup>, Simon Gibbs<sup>38</sup>, Kimberley Gilmour<sup>88</sup>, Barbara Girerd<sup>89,90,91</sup>, Sarah Goddard<sup>92</sup>, Keith Gomez<sup>21,22</sup>, Pavels Gordins<sup>93</sup>, David Gosal<sup>6</sup>, Stefan Gräfl<sup>1,16,29</sup>, Luigi Grassi<sup>1,16</sup>, Daniel Greene<sup>1,16,17</sup>, Lynn Greenhalgh<sup>94</sup>, Andreas Greinacher<sup>95</sup>, Paolo Gresele<sup>96</sup>, Philip Griffiths<sup>97,98</sup>, Sofia Grigoriadou<sup>99</sup>, Russell Grocock<sup>26</sup>, Detelina Grozeva<sup>11</sup>, Scott Hackett<sup>100</sup>, Charaka Hadinnapola<sup>29</sup>, William Hague<sup>101</sup>, Matthias Haimel<sup>1,16,29</sup>, Matthew Hall<sup>70</sup>, Helen Hanson<sup>94</sup>, Kirsty Harkness<sup>102</sup>, Andrew Harper<sup>38,67,103</sup>, Claire Harris<sup>64</sup>, Daniel Hart<sup>55</sup>, Ahamad Hassan<sup>104</sup>, Grant Hayman<sup>105</sup>, Alex Henderson<sup>106</sup>, Jonathan Hoffmann<sup>54</sup>, Rita Horvath<sup>107,108</sup>, Arjan Houweling<sup>30</sup>, Luke Howard<sup>38</sup>, Fengyuan Hu<sup>1,16</sup>, Gavin Hudson<sup>107</sup>, Joseph Hughes<sup>26</sup>, Aarnoud Huissoon<sup>100</sup>, Marc Humbert<sup>89,90,91</sup>, Sean Humphray<sup>26</sup>, Sarah Hunter<sup>26</sup>, Matthew Hurles<sup>109</sup>, Louise Izatt<sup>110</sup>, Roger James<sup>1,16</sup>, Sally Johnson<sup>111</sup>, Stephen Jolles<sup>112,113</sup>, Jennifer Jolley<sup>1,16</sup>, Neringa Jurkute<sup>14,22</sup>, Mary Kasanicki<sup>114</sup>, Hanadi Kazkaz<sup>115</sup>, Rashid Kazmi<sup>31</sup>, Peter Kelleher<sup>39</sup>, David Kiely<sup>57</sup>, Nathalie Kingston<sup>1</sup>, Robert Klima<sup>44</sup>, Myrto Kostadima<sup>1,16</sup>, Gabor Kovacs<sup>116,117</sup>, Ania Koziell<sup>118,119</sup>, Roman Kreuzhuber<sup>1,16</sup>, Taco Kuijpers<sup>120,121</sup>, Ajith Kumar<sup>3</sup>, Dinakantha Kumararatne<sup>114</sup>, Manju Kurian<sup>122,123</sup>, Michael Laffan<sup>124,125</sup>, Fiona Lalloo<sup>77</sup>, Michele Lambert<sup>126,127</sup>, Hana Lango Allen<sup>1,16</sup>, Allan Lawrie<sup>128</sup>, Mark Layton<sup>124</sup>, Claire Lentaigne<sup>124,125</sup>, Adam Levine<sup>85</sup>, Rachel Linger<sup>1,16</sup>, Hilary Longhurst<sup>99</sup>, Eleni Louka<sup>18,19</sup>, Robert MacKenzie Ross<sup>129</sup>, Bella Madan<sup>130</sup>, Eamonn Maher<sup>11,131</sup>, Jesmeen Maimaris<sup>88</sup>, Sarah Mangles<sup>132</sup>, Rutendo Mapeta<sup>1,16</sup>, Kevin Marchbank<sup>64</sup>, Stephen Marks<sup>9</sup>, Hugh S Markus<sup>69</sup>, Hanns-Ulrich Marschall<sup>133</sup>, Andrew Marshall<sup>134,135,136</sup>, Jennifer Martin<sup>1,16,29</sup>, Mary Mathias<sup>137</sup>, Emma Matthews<sup>22,138</sup>, Heather Maxwell<sup>139</sup>, Paul McAlinden<sup>64</sup>, Mark McCarthy<sup>19,103,140</sup>, Stuart Meacham<sup>1,16</sup>, Adam Mead<sup>141</sup>, Karyn Megy<sup>1,16</sup>, Sarju Mehta<sup>142</sup>, Michel Michaelides<sup>14</sup>, Carolyn Millar<sup>124,125</sup>, Shahin Moledina<sup>9</sup>, David Montani<sup>89,90,91</sup>, Tony Moore<sup>14,15</sup>, Nicholas Morrell<sup>1,29</sup>, Monika Mozere<sup>85</sup>, MPGN/C3 Glomerulopathy Rare Renal Disease group<sup>143</sup>, Keith Muir<sup>144</sup>, Andrew Mumford<sup>145,146</sup>, Michael Newnham<sup>29</sup>, Jennifer O'Sullivan<sup>130</sup>, Samya Obaji<sup>56</sup>, Steven Okoli<sup>18,19</sup>, Andrea Olschewski<sup>116</sup>, Horst Olschewski<sup>116,117</sup>, Kai Ren Ong<sup>54</sup>, Elizabeth Ormondroyd<sup>67,68</sup>, Willem Ouwehand<sup>1,16</sup>, Sofia Papadia<sup>1,16</sup>, Soo-Mi Park<sup>12,13,147</sup>, David Parry<sup>5</sup>, Joan Paterson<sup>11,12,13</sup>, Andrew Peacock<sup>53</sup>, John Peden<sup>26</sup>, Kathelijne Peerlinck<sup>84</sup>, Christopher Penkett<sup>1,16</sup>, Joanna Pepke-Zaba<sup>148</sup>, Romina Petersen<sup>1,16</sup>, Angela Pyle<sup>107</sup>, Stuart Rankin<sup>44</sup>, Anupama Rao<sup>9</sup>, F Lucy Raymond<sup>1,11</sup>, Paula Rayner-Matthews<sup>1,16</sup>, Christine Rees<sup>26</sup>, Augusto Rendon<sup>45</sup>, Tara Renton<sup>43</sup>, Andrew Rice<sup>149,150</sup>, Sylvia Richardson<sup>17</sup>, Alex Richter<sup>10</sup>, Irene Roberts<sup>18,19,151</sup>, Catherine Roughley<sup>76</sup>, Noemi Roy<sup>18,19,151</sup>, Omid Sadeghi-Alavijeh<sup>85</sup>, Moin Saleem<sup>27</sup>, Nilesh Samani<sup>152</sup>, Alba Sanchis-Juan<sup>1,16</sup>, Ravishankar Sargur<sup>73</sup>, Simon Satchell<sup>27</sup>, Sinisa Savic<sup>153</sup>, Laura Scelsi<sup>87</sup>, Sol Schulman<sup>154</sup>, Marie Scully<sup>115</sup>, Claire Searle<sup>155</sup>, Werner Seeger<sup>86</sup>, Carrock Sewell<sup>156</sup>, Denis Seyres<sup>1,16</sup>, Susie Shapiro<sup>65</sup>, Olga Sharmardina<sup>1,16</sup>, Rakefet

Shtoyerman<sup>157</sup>, Keith Sibson<sup>137</sup>, Lucy Side<sup>3</sup>, Ilenia Simeoni<sup>1,16</sup>, Michael Simpson<sup>158</sup>, Suthesh Sivapalaratnam<sup>55</sup>, Anne-Bine Skytte<sup>159</sup>, Katherine Smith<sup>45</sup>, Kenneth G C Smith<sup>29,160</sup>, Katie Snape<sup>161</sup>, Florent Soubrier<sup>79</sup>, Simon Staines<sup>1,16</sup>, Emily Staples<sup>29</sup>, Hannah Stark<sup>1,16</sup>, Jonathan Stephens<sup>1,16</sup>, Kathleen Stirrups<sup>1,16</sup>, Sophie Stock<sup>1,16</sup>, Jay Suntharalingam<sup>129</sup>, Emilia Swietlik<sup>29</sup>, R Campbell Tait<sup>162</sup>, Kate Talks<sup>28</sup>, Rhea Tan<sup>69</sup>, James Thaventhiran<sup>29</sup>, Andreas Themistocleous<sup>25</sup>, Moira Thomas<sup>163</sup>, Kate Thomson<sup>67,68</sup>, Adrian Thrasher<sup>9</sup>, Chantal Thys<sup>84</sup>, Marc Tischkowitz<sup>164</sup>, Catherine Titterton<sup>1,16</sup>, Cheng-Hock Toh<sup>71</sup>, Mark Toshner<sup>29</sup>, Matthew Traylor<sup>69</sup>, Carmen Treacy<sup>29,148</sup>, Richard Trembath<sup>41</sup>, Salih Tuna<sup>1,16</sup>, Wojciech Turek<sup>44</sup>, Ernest Turro<sup>1,16,17</sup>, Tom Vale<sup>25</sup>, Chris Van Geet<sup>84</sup>, Natalie Van Zuydam<sup>25</sup>, Marta Vazquez-Lopez<sup>49</sup>, Julie von Ziegenweidt<sup>1,16</sup>, Anton Vonk Noordegraaf<sup>30</sup>, Quintin Waisfisz<sup>30</sup>, Suellen Walker<sup>9</sup>, James Ware<sup>38,39,58</sup>, Hugh Watkins<sup>67,68,103</sup>, Christopher Watt<sup>1,16</sup>, Andrew Webster<sup>14,15</sup>, Wei Wei<sup>50</sup>, Steven Welch<sup>100</sup>, Julie Wessels<sup>92</sup>, Sarah Westbury<sup>145,146</sup>, John-Paul Westwood<sup>115</sup>, John Wharton<sup>62</sup>, Deborah Whitehorn<sup>1,16</sup>, James Whitworth<sup>11,12,13</sup>, Martin R Wilkins<sup>62</sup>, Catherine Williamson<sup>48,165</sup>, Edwin Wong<sup>98</sup>, Nicholas Wood<sup>166,167</sup>, Yvette Wood<sup>1,16</sup>, Geoff Woods<sup>11,114</sup>, Emma Woodward<sup>77</sup>, Stephen Wort<sup>39,41</sup>, Austen Worth<sup>9</sup>, Katherine Yates<sup>1,16,29</sup>, Patrick Yong<sup>168</sup>, Tim Young<sup>1,16</sup>, Ping Yu<sup>1,16</sup>, Patrick Yu-Wai-Man<sup>50</sup>

## Affiliations

<sup>1</sup>NIHR BioResource, Cambridge University Hospitals NHS Foundation, Cambridge Biomedical Campus, Cambridge, UK. <sup>2</sup>Chapel Allerton Hospital, Leeds Teaching Hospitals NHS Trust, Leeds, UK. <sup>3</sup>North East Thames Regional Genetics Service, Great Ormond Street Hospital for Children NHS Foundation Trust, London, UK. <sup>4</sup>MRC Clinical Sciences Centre, Faculty of Medicine, Imperial College London, London, UK. <sup>5</sup>Institute of Genetics and Molecular Medicine, University of Edinburgh, Edinburgh, UK. <sup>6</sup>Salford Royal NHS Foundation Trust, Salford, UK. <sup>7</sup>Queens Centre for Haematology and Oncology, Castle Hill Hospital, Hull and East Yorkshire NHS Trust, Cottingham, UK. <sup>8</sup>European Molecular Biology Laboratory, European Bioinformatics Institute (EMBL-EBI), Wellcome Genome Campus, Hinxton, Cambridge, UK. <sup>9</sup>Great Ormond Street Hospital for Children NHS Foundation Trust, London, UK. <sup>10</sup>University Hospitals Birmingham NHS Foundation Trust, Birmingham, UK. <sup>11</sup>Department of Medical Genetics, Cambridge Institute for Medical Research, University of Cambridge, Cambridge Biomedical Campus, Cambridge, UK. <sup>12</sup>Cancer Research UK Cambridge Centre, Cambridge Biomedical Campus, Cambridge, UK. <sup>13</sup>NIHR Cambridge Biomedical Research Centre, Cambridge Biomedical Campus, Cambridge, UK. <sup>14</sup>Moorfields Eye Hospital NHS Foundation Trust, London, UK. <sup>15</sup>UCL Institute of Ophthalmology, University College London, London, UK. <sup>16</sup>Department of Haematology, University of Cambridge, Cambridge Biomedical Campus, Cambridge, UK. <sup>17</sup>MRC Biostatistics Unit, Cambridge Institute of Public Health, University of Cambridge, Cambridge, UK. <sup>18</sup>MRC Molecular Haematology Unit, Weatherall Institute of Molecular Medicine, University of Oxford, Oxford, UK. <sup>19</sup>NIHR Oxford Biomedical Research Centre, Oxford University Hospitals Trust, Oxford, UK. <sup>20</sup>Center for Clinical Transfusion Medicine, University Hospital of Tübingen, Tübingen, Germany. <sup>21</sup>The Katharine Dormandy Haemophilia Centre and Thrombosis Unit, Royal Free London NHS Foundation Trust, London, UK. <sup>22</sup>University College London, London, UK. <sup>23</sup>Department of Clinical Genetics, Leicester Royal Infirmary, University Hospitals of Leicester, Leicester, UK. <sup>24</sup>University of Leicester, Leicester, UK. <sup>25</sup>The Nuffield Department of Clinical Neurosciences, University of Oxford, John Radcliffe Hospital, Oxford, UK. <sup>26</sup>Illumina Limited, Chesterford Research Park, Little Chesterford, Nr Saffron Walden, UK. <sup>27</sup>Bristol Renal, University of Bristol, Bristol, UK. <sup>28</sup>Haematology Department, Royal Victoria Infirmary, The Newcastle upon Tyne Hospitals NHS Foundation Trust, Newcastle upon Tyne, UK. <sup>29</sup>Department of Medicine, School of Clinical Medicine, University of Cambridge, Cambridge Biomedical Campus, Cambridge, UK. <sup>30</sup>Department of Pulmonary Medicine, VU University Medical Centre, Amsterdam, The Netherlands. <sup>31</sup>Southampton General Hospital, University Hospital Southampton NHS Foundation Trust, Southampton, UK. <sup>32</sup>MRC Social, Genetic & Developmental Psychiatry Centre, Institute of Psychiatry, Psychology & Neuroscience, King's College London,

London, UK. <sup>33</sup>NIHR Biomedical Research Centre for Mental Health, Maudsley Hospital, London, UK. <sup>34</sup>Newcastle University, Newcastle upon Tyne, UK. <sup>35</sup>Newcastle upon Tyne Hospitals NHS Foundation Trust, Newcastle upon Tyne, UK. <sup>36</sup>Department of Clinical Genetics, Royal Devon & Exeter Hospital, Royal Devon and Exeter NHS Foundation Trust, Exeter, UK. <sup>37</sup>Department of Immunology, Leicester Royal Infirmary, Leicester, UK. <sup>38</sup>National Heart and Lung Institute, Imperial College London, Royal Brompton Hospital, London, UK. <sup>39</sup>Royal Brompton Hospital, Royal Brompton and Harefield NHS Foundation Trust, London, UK. <sup>40</sup>Royal Free London NHS Foundation Trust, London, UK. <sup>41</sup>King's College London, London, UK. <sup>42</sup>Guy's and St Thomas' Hospital, Guy's and St Thomas' NHS Foundation Trust, London, UK. <sup>43</sup>King's College Hospital NHS Foundation Trust, London, UK. <sup>44</sup>High Performance Computing Service, University of Cambridge, Cambridge, UK. <sup>45</sup>Genomics England Ltd, London, UK. <sup>46</sup>Epidemiology and Biostatistics, Imperial College London, London, UK. <sup>47</sup>Imperial College Healthcare NHS Trust, London, UK. <sup>48</sup>Division of Women's Health, King's College London, London, UK. <sup>49</sup>Women's Health Research Centre, Surgery and Cancer, Faculty of Medicine, Hammersmith Hospital, Imperial College Healthcare NHS Trust, London, UK. <sup>50</sup>Department of Clinical Neurosciences, School of Clinical Medicine, University of Cambridge, Cambridge Biomedical Campus, Cambridge, UK. <sup>51</sup>Medical Research Council Mitochondrial Biology Unit, Cambridge Biomedical Campus, Cambridge, UK. <sup>52</sup>Children's Renal and Urology Unit, Nottingham Children's Hospital, QMC, Nottingham University Hospitals NHS Trust, Nottingham, UK. <sup>53</sup>Golden Jubilee National Hospital, Glasgow, UK. <sup>54</sup>West Midlands Regional Genetics Service, Birmingham Women's and Children's NHS Foundation Trust, Birmingham, UK. <sup>55</sup>The Royal London Hospital, Barts Health NHS Foundation Trust, London, UK. <sup>56</sup>The Arthur Bloom Haemophilia Centre, University Hospital of Wales, Cardiff, UK. <sup>57</sup>Sheffield Pulmonary Vascular Disease Unit, Royal Hallamshire Hospital NHS Foundation Trust, Sheffield, UK. <sup>58</sup>MRC London Institute of Medical Sciences, Imperial College London, London, UK. <sup>59</sup>National Heart Research Institute Singapore, National Heart Centre Singapore, Singapore, Singapore. <sup>60</sup>Division of Cardiovascular & Metabolic Disorders, Duke-National University of Singapore, Singapore, Singapore. <sup>61</sup>Imperial College Renal and Transplant Centre, Hammersmith Hospital, Imperial College Healthcare NHS Trust, London, UK. <sup>62</sup>Department of Medicine, Imperial College London, London, UK. <sup>63</sup>National Pulmonary Hypertension Service (Newcastle), The Newcastle upon Tyne Hospitals NHS Foundation Trust, Newcastle upon Tyne, UK. <sup>64</sup>Institute of Cellular Medicine, Faculty of Medical Sciences, Newcastle University, Newcastle upon Tyne, UK. <sup>65</sup>Oxford Haemophilia and Thrombosis Centre, The Churchill Hospital, Oxford University Hospitals NHS Trust, Oxford, UK. <sup>66</sup>Department of Molecular Medicine, General Biology, and Medical Genetics Unit, University of Pavia, Pavia, Italy. <sup>67</sup>Department of Cardiovascular Medicine, Radcliffe Department of Medicine, University of Oxford, Oxford, UK. <sup>68</sup>Oxford University Hospitals NHS Foundation Trust, Oxford, UK. <sup>69</sup>Stroke Research Group, Department of Clinical Neurosciences, University of Cambridge, Cambridge Biomedical Campus, Cambridge, UK. <sup>70</sup>Nottingham University Hospitals NHS Trust, Nottingham, UK. <sup>71</sup>The Roald Dahl Haemostasis and Thrombosis Centre, The Royal Liverpool Hospital, Liverpool, UK. <sup>72</sup>Regional Immunology Service, Kelvin Building, Royal Victoria Hospital, Belfast, UK. <sup>73</sup>Sheffield Teaching Hospitals NHS Foundation Trust, Sheffield, UK. <sup>74</sup>Pathology and Laboratory Medicine, University of Western Australia, Crawley, Australia. <sup>75</sup>Ramón Sardá Mother's and Children's Hospital, Buenos Aires, Argentina. <sup>76</sup>Haemophilia Centre, Kent & Canterbury Hospital, East Kent Hospitals University Foundation Trust, Canterbury, UK. <sup>77</sup>Manchester Centre for Genomic Medicine, Saint Mary's Hospital, Manchester, UK. <sup>78</sup>Salisbury District Hospital, Salisbury NHS Foundation Trust, Salisbury, UK. <sup>79</sup>Département de génétique, Hôpital Pitie-Salpetrière, Paris, France. <sup>80</sup>Service d'Hématologie Biologique, Hôpital d'enfants Armand Trousseau, Paris, France, Paris, France. <sup>81</sup>Inserm U1170, Villejuif, France. <sup>82</sup>Assistance Publique-Hôpitaux de Paris, Département d'Hématologie, Hôpital Armand Trousseau, Paris, France. <sup>83</sup>Department of Paediatrics, School of Clinical Medicine, University of Cambridge, Cambridge Biomedical Campus, Cambridge, UK. <sup>84</sup>Department of Cardiovascular Sciences, Center for Molecular and Vascular Biology, University of Leuven, Leuven, Belgium. <sup>85</sup>UCL Centre for Nephrology, University College London, London, UK. <sup>86</sup>University of Giessen and Marburg Lung Center (UGMLC), Giessen, Germany. <sup>87</sup>Division of Cardiology, Fondazione IRCCS Policlinico S. Matteo, Pavia, Italy. <sup>88</sup>UCL Great Ormond

Street Institute of Child Health, London, UK. <sup>89</sup>Universite Paris-Sud, Le Kremlin-Bicêtre, France. <sup>90</sup>Service de Pneumologie, DHU Thorax Innovation, Hôpital Bicêtre, Le Kremlin-Bicêtre, France. <sup>91</sup>INSERM U999, LabEx LERMIT, Centre Chirurgical Marie Lannelongue, Le Plessis Robinson, France. <sup>92</sup>University Hospitals of North Midlands NHS Trust, Stoke-on-Trent, UK. <sup>93</sup>East Yorkshire Regional Adult Immunology and Allergy Unit, Hull Royal Infirmary, Hull & East Yorkshire Hospitals NHS Trust, Hull, UK. <sup>94</sup>Department of Clinical Genetics, Liverpool Women's NHS Foundation, Liverpool, UK. <sup>95</sup>Institute for Immunology and Transfusion Medicine, University of Greifswald, Greifswald, Germany. <sup>96</sup>Section of Internal and Cardiovascular Medicine, University of Perugia, Perugia, Italy. <sup>97</sup>Mitochondrial Research Group, Institute of Genetic Medicine, Newcastle University, Newcastle upon Tyne, UK. <sup>98</sup>Institute of Genetic Medicine, Newcastle University, Newcastle upon Tyne, UK. <sup>99</sup>Barts Health NHS Foundation Trust, London, UK. <sup>100</sup>Birmingham Heartlands Hospital, Heart of England NHS Foundation Trust, Birmingham, UK. <sup>101</sup>ARCH: Australian Research Centre for Health of Women and Babies, Robinson Research Institute, Discipline of Obstetrics and Gynaecology, The University of Adelaide, Women's and Children's Hospital, Adelaide, Australia. <sup>102</sup>Department of Neurology, Sheffield Teaching Hospitals NHS Foundation Trust, Sheffield, UK. <sup>103</sup>Wellcome Trust Centre for Human Genetics, University of Oxford, Oxford, UK. <sup>104</sup>Department of Neurology, Leeds Teaching Hospital NHS Trust, Leeds, UK. <sup>105</sup>Epsom & St Helier University Hospitals NHS Trust, London, UK. <sup>106</sup>Northern Genetics Service, The Newcastle upon Tyne Hospitals NHS Foundation Trust, International Centre for Life, Newcastle upon Tyne, UK. <sup>107</sup>Wellcome Centre for Mitochondrial Research, Institute of Genetic Medicine, Newcastle University, Newcastle upon Tyne, UK. <sup>108</sup>John Walton Muscular Dystrophy Research Centre, Institute of Genetic Medicine, Newcastle University, Newcastle upon Tyne, UK. <sup>109</sup>Wellcome Trust Sanger Institute, Hinxton, Cambridge, UK. <sup>110</sup>Department of Clinical Genetics, Guy's and St Thomas' NHS Foundation Trust, London, UK. <sup>111</sup>Department of Paediatric Nephrology, Great North Children's Hospital, Newcastle upon Tyne Hospitals NHS Foundation Trust, Newcastle upon Tyne, UK. <sup>112</sup>University Hospital of Wales, Cardiff, UK. <sup>113</sup>Cardiff & Vale University LHB, Cardiff, UK. <sup>114</sup>Addenbrookes Hospital, Cambridge University Hospitals NHS Foundation Trust, Cambridge, UK. <sup>115</sup>University College London Hospitals NHS Foundation Trust, London, UK. <sup>116</sup>Ludwig Boltzmann Institute for Lung Vascular Research, Graz, Austria. <sup>117</sup>Dept of Internal Medicine, Division of Pulmonology, Medical University of Graz, Graz, Austria. <sup>118</sup>Division of Transplantation Immunology and Mucosal Biology, Department of Experimental Immunobiology, Faculty of Life Sciences and Medicine, King's College London, London, UK. <sup>119</sup>Department of Paediatric Nephrology, Evelina London Children's Hospital, Guy's & St Thomas' NHS Foundation Trust, London, UK. <sup>120</sup>Department of Pediatric Hematology, Immunology, Rheumatology and Infectious Diseases, Emma Children's Hospital, Academic Medical Center (AMC), University of Amsterdam, Amsterdam, The Netherlands. <sup>121</sup>Department of Clinical Genetics, Academic Medical Center (AMC), University of Amsterdam, Amsterdam, The Netherlands. <sup>122</sup>Molecular Neurosciences, Developmental Neurosciences, UCL Great Ormond Street Institute of Child Health, London, UK. <sup>123</sup>Department of Neurology, Great Ormond Street Hospital for Children NHS Foundation Trust, London, UK. <sup>124</sup>Department of Haematology, Hammersmith Hospital, Imperial College Healthcare NHS Trust, London, UK. <sup>125</sup>Department of Haematology, Imperial College London, London, UK. <sup>126</sup>Division of Hematology, The Children's Hospital of Philadelphia, Philadelphia, USA. <sup>127</sup>Department of Pediatrics, Perelman School of Medicine at the University of Pennsylvania, Philadelphia, USA. <sup>128</sup>Department of Infection, Immunity & Cardiovascular Disease, University of Sheffield, Sheffield, UK. <sup>129</sup>Royal United Hospitals Bath NHS Foundation Trust, Bath, UK. <sup>130</sup>Department of Haematology, Guy's and St Thomas' NHS Foundation Trust, London, UK. <sup>131</sup>Cambridge NIHR Biomedical Research Centre, Cambridge Biomedical Campus, Cambridge, UK. <sup>132</sup>Haemophilia, Haemostasis and Thrombosis Centre, Hampshire Hospitals NHS Foundation Trust, Basingstoke, UK. <sup>133</sup>Wallenberg Laboratory, Department of Molecular and Clinical Medicine, Sahlgrenska Academy, University of Gothenburg, Gothenburg, Sweden. <sup>134</sup>Faculty of Medical and Human Sciences, Centre for Endocrinology and Diabetes, Institute of Human Development, University of Manchester, Manchester, UK. <sup>135</sup>Department of Clinical Neurophysiology, Manchester Royal Infirmary, Central Manchester University Hospitals National Health Service Foundation Trust, Manchester Academic Health

Science Centre, Manchester, UK. <sup>136</sup>National Institute for Health Research/Wellcome Trust Clinical Research Facility, Manchester, UK. <sup>137</sup>Department of Haematology, Great Ormond Street Hospital for Children NHS Foundation Trust, London, UK. <sup>138</sup>The National Hospital for Neurology and Neurosurgery, University College London Hospitals NHS Foundation Trust, London, UK. <sup>139</sup>Royal Hospital for Children, NHS Greater Glasgow and Clyde, Glasgow, UK. <sup>140</sup>Oxford Centre for Diabetes, Endocrinology and Metabolism, University of Oxford, Churchill Hospital, Oxford, UK. <sup>141</sup>Centre for Haematology, Department of Medicine, Hammersmith Hospital, Imperial College Healthcare NHS Trust, London, UK. <sup>142</sup>Department of Clinical Genetics, Addenbrookes Hospital, Cambridge University Hospitals NHS Foundation Trust, Cambridge, UK. <sup>143</sup>MPGN/C3 Glomerulopathy Rare Renal Disease group, , UK. <sup>144</sup>Institute of Neuroscience and Psychology, University of Glasgow, Glasgow, UK. <sup>145</sup>School of Cellular and Molecular Medicine, University of Bristol, Bristol, UK. <sup>146</sup>University Hospitals Bristol NHS Foundation Trust, Bristol, UK. <sup>147</sup>East Anglian Regional Genetics Service, Cambridge University Hospitals NHS Foundation Trust, Cambridge, UK. <sup>148</sup>Royal Papworth Hospital NHS Foundation Trust, Cambridge, UK. <sup>149</sup>Pain Research, Department of Surgery and Cancer, Faculty of Medicine, Imperial College London, London, UK. <sup>150</sup>Chelsea and Westminster Hospital NHS Foundation Trust, London, UK. <sup>151</sup>Department of Paediatrics, Weatherall Institute of Molecular Medicine, University of Oxford, Oxford, UK. <sup>152</sup>Departments of Cardiovascular Sciences and NIHR Leicester Cardiovascular Biomedical Research Unit, University of Leicester, Leicester, UK. <sup>153</sup>The Leeds Teaching Hospitals NHS Trust, Leeds, UK. <sup>154</sup>Beth Israel Deaconess Medical Centre and Harvard Medical School, Boston, USA. <sup>155</sup>Department of Clinical Genetics, Nottingham University Hospitals NHS Trust, Nottingham, UK. <sup>156</sup>Scunthorpe General Hospital, Northern Lincolnshire and Goole NHS Foundation Trust, Scunthorpe, UK. <sup>157</sup>Clinical Genetics Institute, Kaplan Medical Center, Rehovot, Israel. <sup>158</sup>Genetics and Molecular Medicine, King's College London, London, UK. <sup>159</sup>Aarhus University Hospital, Aarhus, Denmark. <sup>160</sup>Cambridge Institute for Medical Research, University of Cambridge, Cambridge Biomedical Campus, Cambridge, UK. <sup>161</sup>Department of Clinical Genetics, St George's University Hospitals NHS Foundation Trust, London, UK. <sup>162</sup>Glasgow Royal Infirmary, NHS Greater Glasgow and Clyde, Glasgow, UK. <sup>163</sup>Gartnavel General Hospital, NHS Greater Glasgow and Clyde, Glasgow, UK. <sup>164</sup>Addenbrooke's Treatment Centre, Addenbrooke's Hospital, Cambridge University Hospitals NHS Foundation Trust, Cambridge, UK. <sup>165</sup>Institute of Reproductive and Developmental Biology, Surgery and Cancer, Hammersmith Hospital, Imperial College Healthcare NHS Trust, London, UK. <sup>166</sup>Department of Molecular Neuroscience, UCL Institute of Neurology, London, UK. <sup>167</sup>UCL Genetics Institute, London, UK. <sup>168</sup>Frimley Park Hospital, NHS Frimley Health Foundation Trust, Camberley, UK.
